# Supplementary material for: Quantitative microbial risk assessment of the impact of drought and seasonality on a de facto reuse system in Southern Nevada, USA
Source: Royal Society of Chemistry journal article supplement (doi:10.1039/d5ew00514k), 2025-12-22
Supplement: d5ew00514k2.xlsx [file d5ew00514k2.xlsx]

## Sheet: parameters
parameter	pathogen	mean_or_value	stdev	alpha	beta	r	facility	season	lakelevel	min	max	distribution	measurement	reference	note
C	AdV	5.649	1.20335	NA	NA	NA	3	all	all	NA	NA	normal	Concentration (log10gc/L)	Crank et al. 2024
C	AdV.culture	3.44025	0.550945	NA	NA	NA	3	all	all	NA	NA	normal	Concentration (log10gc/L)	Crank et al. 2024
C	Crypto	2.22064	0.436775	NA	NA	NA	3	all	all	NA	NA	normal	Concentration (log10gc/L)	Crank et al. 2024
C	EnV	5.41055	0.646002	NA	NA	NA	3	all	all	NA	NA	normal	Concentration (log10gc/L)	Crank et al. 2024
C	EnV.culture	3.99082	0.867927	NA	NA	NA	3	all	all	NA	NA	normal	Concentration (log10gc/L)	Crank et al. 2024
C	Giardia	4.01469	0.274408	NA	NA	NA	3	all	all	NA	NA	normal	Concentration (log10gc/L)	Crank et al. 2024
C	NoV	6.46204	1.01616	NA	NA	NA	3	all	all	NA	NA	normal	Concentration (log10gc/L)	raw from Crank et al. 2024, summed from this study
C	NoV	6.10388	2.27336	NA	NA	NA	1	fall	all	NA	NA	normal	Concentration (log10gc/L)	raw from Crank et al. 2024, summed from this study
C	NoV	7.14117	2.25195	NA	NA	NA	1	spring	all	NA	NA	normal	Concentration (log10gc/L)	raw from Crank et al. 2024, summed from this study
C	NoV	5.66153	2.29347	NA	NA	NA	1	summer	all	NA	NA	normal	Concentration (log10gc/L)	raw from Crank et al. 2024, summed from this study
C	NoV	7.05454	1.77751	NA	NA	NA	1	winter	all	NA	NA	normal	Concentration (log10gc/L)	raw from Crank et al. 2024, summed from this study
C	AdV	7.11823	0.962953	NA	NA	NA	2	all	all	NA	NA	normal	Concentration (log10gc/L)	Crank et al. 2024
C	AdV.culture	3.53875	0.815383	NA	NA	NA	2	all	all	NA	NA	normal	Concentration (log10gc/L)	Crank et al. 2024
C	Crypto	2.29313	0.423774	NA	NA	NA	2	all	all	NA	NA	normal	Concentration (log10gc/L)	Crank et al. 2024
C	EnV	5.91738	1.29321	NA	NA	NA	2	all	all	NA	NA	normal	Concentration (log10gc/L)	Crank et al. 2024
C	EnV.culture	4.59822	0.481062	NA	NA	NA	2	all	all	NA	NA	normal	Concentration (log10gc/L)	Crank et al. 2024
C	Giardia	3.89651	0.122389	NA	NA	NA	2	all	all	NA	NA	normal	Concentration (log10gc/L)	Crank et al. 2024
C	NoV	6.97191	1.64231	NA	NA	NA	2	all	all	NA	NA	normal	Concentration (log10gc/L)	raw from Crank et al. 2024, summed from this study
C	NoV	6.97531	1.57922	NA	NA	NA	2	fall	all	NA	NA	normal	Concentration (log10gc/L)	raw from Crank et al. 2024, summed from this study
C	NoV	7.35109	1.60029	NA	NA	NA	2	spring	all	NA	NA	normal	Concentration (log10gc/L)	raw from Crank et al. 2024, summed from this study
C	NoV	5.91789	2.0639	NA	NA	NA	2	summer	all	NA	NA	normal	Concentration (log10gc/L)	raw from Crank et al. 2024, summed from this study
C	NoV	7.53121	1.64148	NA	NA	NA	2	winter	all	NA	NA	normal	Concentration (log10gc/L)	raw from Crank et al. 2024, summed from this study
C	AdV	7.008	0.891584	NA	NA	NA	4	all	all	NA	NA	normal	Concentration (log10gc/L)	Crank et al. 2024
C	AdV.culture	3.23676	0.598521	NA	NA	NA	4	all	all	NA	NA	normal	Concentration (log10gc/L)	Crank et al. 2024
C	Crypto	1.92038	0.562749	NA	NA	NA	4	all	all	NA	NA	normal	Concentration (log10gc/L)	Crank et al. 2024
C	EnV	5.82301	1.12728	NA	NA	NA	4	all	all	NA	NA	normal	Concentration (log10gc/L)	Crank et al. 2024
C	EnV.culture	4.01796	0.436591	NA	NA	NA	4	all	all	NA	NA	normal	Concentration (log10gc/L)	Crank et al. 2024
C	Giardia	3.58434	0.144155	NA	NA	NA	4	all	all	NA	NA	normal	Concentration (log10gc/L)	Crank et al. 2024
C	NoV	6.91408	1.43333	NA	NA	NA	4	all	all	NA	NA	normal	Concentration (log10gc/L)	raw from Crank et al. 2024, summed from this study
C	NoV	6.30028	1.31648	NA	NA	NA	3	fall	all	NA	NA	normal	Concentration (log10gc/L)	raw from Crank et al. 2024, summed from this study
C	NoV	6.07208	1.70751	NA	NA	NA	3	spring	all	NA	NA	normal	Concentration (log10gc/L)	raw from Crank et al. 2024, summed from this study
C	NoV	6.18666	0.899594	NA	NA	NA	3	summer	all	NA	NA	normal	Concentration (log10gc/L)	raw from Crank et al. 2024, summed from this study
C	NoV	6.75903	1.19604	NA	NA	NA	3	winter	all	NA	NA	normal	Concentration (log10gc/L)	raw from Crank et al. 2024, summed from this study
C	AdV	6.8387	1.07322	NA	NA	NA	1	all	all	NA	NA	normal	Concentration (log10gc/L)	Crank et al. 2024
C	AdV.culture	3.83775	0.950276	NA	NA	NA	1	all	all	NA	NA	normal	Concentration (log10gc/L)	Crank et al. 2024
C	Crypto	2.21118	0.424432	NA	NA	NA	1	all	all	NA	NA	normal	Concentration (log10gc/L)	Crank et al. 2024
C	EnV	5.75794	1.40778	NA	NA	NA	1	all	all	NA	NA	normal	Concentration (log10gc/L)	Crank et al. 2024
C	EnV.culture	4.07857	0.452536	NA	NA	NA	1	all	all	NA	NA	normal	Concentration (log10gc/L)	Crank et al. 2024
C	Giardia	3.81206	0.108026	NA	NA	NA	1	all	all	NA	NA	normal	Concentration (log10gc/L)	Crank et al. 2024
C	NoV	6.50465	2.12794	NA	NA	NA	1	all	all	NA	NA	normal	Concentration (log10gc/L)	raw from Crank et al. 2024, summed from this study
C	NoV	6.78249	1.70695	NA	NA	NA	4	fall	all	NA	NA	normal	Concentration (log10gc/L)	raw from Crank et al. 2024, summed from this study
C	NoV	7.41201	1.0507	NA	NA	NA	4	spring	all	NA	NA	normal	Concentration (log10gc/L)	raw from Crank et al. 2024, summed from this study
C	NoV	5.8627	1.59526	NA	NA	NA	4	summer	all	NA	NA	normal	Concentration (log10gc/L)	raw from Crank et al. 2024, summed from this study
C	NoV	7.48779	1.02512	NA	NA	NA	4	winter	all	NA	NA	normal	Concentration (log10gc/L)	raw from Crank et al. 2024, summed from this study
dr	AdV	NA	NA	5.11	2.8	NA	NA	noseason	all	NA	NA	exact beta-Poisson	Dose-Response	Teunis et al. 2016
dr	Crypto	NA	NA	0.116	0.121	NA	NA	noseason	all	NA	NA	beta-Poisson	Dose-Response	Messner and Berger, 2016
dr	EnV	NA	NA	0.253	0.426	NA	NA	noseason	all	NA	NA	beta-Poisson	Dose-Response	Ward et al. 1986
dr	Giardia	NA	NA	NA	NA	0.0199	NA	noseason	all	NA	NA	exponential	Dose-Response	Teunis et al. 1997
dr	NoV	NA	NA	0.04	0.055	NA	NA	noseason	all	NA	NA	hypergeometric	Dose-Response	Teunis et al. 2008	Identical for GI & GII
GC:IU	AdV	3.67	1.12	NA	NA	NA	NA	noseason	all	NA	NA	normal	GC:IU ratio (log10)	Crank et al. 2024
GC:IU	EnV	2.45	0.84	NA	NA	NA	NA	noseason	all	NA	NA	normal	GC:IU ratio (log10)	Crank et al. 2024
GC:IU	NoV	NA	NA	NA	NA	NA	NA	noseason	all	0	2.30103	uniform	GC:IU ratio (log10)	Gerrity et al. 2023;Donia et al., 2010	Identical for GI & GII
k	AdV	-0.442343	0.978938	NA	NA	NA	NA	noseason	all	NA	NA	normal	Decay (1/day) (log10k)	fitted here from Boehm et al. 2019
k	Crypto	-1.37628	0.861476	NA	NA	NA	NA	noseason	all	NA	NA	normal	Decay (1/day) (log10k)	fitted here from Boehm et al. 2018
k	EnV	-0.07	0.57	NA	NA	NA	NA	noseason	all	NA	NA	normal	Decay (1/day) (log10k)	Boehm et al. 2019
k	Giardia	-1.36	0.96	NA	NA	NA	NA	noseason	all	NA	NA	normal	Decay (1/day) (log10k)	Boehm et al. 2018
k	NoV	-0.868677	0.474109	NA	NA	NA	NA	noseason	all	NA	NA	normal	Decay (1/day) (log10k)	fitted here from Boehm et al. 2019	Identical for GI & GII
lrv_dw	Crypto	5.44	NA	NA	NA	NA	NA	noseason	all	NA	NA	point	Log-Reduction Value (AMS)	from SCADA- live value, DWTP and observed LRV (3.47 DWTP, 1.97 is difference at median, total of 5.44 LRVs)
lrv_dw	Giardia	13.77	NA	NA	NA	NA	NA	noseason	all	NA	NA	point	Log-Reduction Value (AMS)	from SCADA- live value
lrv_dw	Virus	13	NA	NA	NA	NA	NA	noseason	all	NA	NA	point	Log-Reduction Value (AMS)	from SCADA- live value
lrv_ww	Crypto	5.274					3	noseason	all			point	Log-Reduction Value (Facility specific)	see table for references	excludes secondary treatment (0.084 without UV, 5.274 with UV)
lrv_ww	Giardia	6.081					3	noseason	all			point	Log-Reduction Value (Facility specific)	see table for references	excludes secondary treatment
lrv_ww	Virus	0.5					3	noseason	all			point	Log-Reduction Value (Facility specific)	see table for references	excludes secondary treatment
lrv_ww	Crypto	0					2	noseason	all			point	Log-Reduction Value (Facility specific)	see table for references	excludes secondary treatment
lrv_ww	Giardia	6					2	noseason	all			point	Log-Reduction Value (Facility specific)	see table for references	with chlorine, excludes secondary treatment
lrv_ww	Virus	4					2	noseason	all			point	Log-Reduction Value (Facility specific)	see table for references	with chlorine, excludes secondary treatment
lrv_ww	Crypto	6					4	noseason	all			point	Log-Reduction Value (Facility specific)	see table for references	excludes secondary treatment (6 with UV, 0 without)
lrv_ww	Giardia	6					4	noseason	all			point	Log-Reduction Value (Facility specific)	see table for references	excludes secondary treatment
lrv_ww	Virus	0.738					4	noseason	all			point	Log-Reduction Value (Facility specific)	see table for references	excludes secondary treatment
lrv_ww	Crypto	2					1	noseason	all			point	Log-Reduction Value (Facility specific)	see table for references	2 is credited
lrv_ww	Giardia	2.34					1	noseason	all			point	Log-Reduction Value (Facility specific)	see table for references	with chlorine
lrv_ww	Virus	5.5					1	noseason	all			point	Log-Reduction Value (Facility specific)	see table for references	with chlorine
lrv_ww_secondary	AdV	2.3	0.8				2, 3, 4		all	0.6	3.6	truncated normal	Log-Reduction Value (Facility specific)	Hill et al. 2025
lrv_ww_secondary	EnV	1.3	0.8				2, 3, 4		all	0.3	3.5	truncated normal	Log-Reduction Value (Facility specific)	Hill et al. 2025
lrv_ww_secondary	NoV	1.1	0.7				2, 3, 4		all	0	2.7	truncated normal	Log-Reduction Value (Facility specific)	Hill et al. 2025
lrv_ww_secondary	Giardia						2, 3, 4		all			2.5156 + Z × 0.1070	Log-Reduction Value (Facility specific)	Tchobanoglous et al. 2021	Z-score/value from standardized normal distribution
lrv_ww_secondary	Crypto						2, 3, 4		all			2.0962 + Z × 0.1085	Log-Reduction Value (Facility specific)	Tchobanoglous et al. 2021	Z-score/value from standardized normal distribution
LVW_perc		0.493151					3					point		Thompson et al. 2024 and Gerrity et al. 2022
LVW_perc		0.20548					2					point		Thompson et al. 2024 and Gerrity et al. 2022
LVW_perc		0.113699					4					point		Thompson et al. 2024 and Gerrity et al. 2022
LVW_perc		0.0876712					1					point		Thompson et al. 2024 and Gerrity et al. 2022
rwc	NA							all	329	1.918	5.4177	uniform	Percent Recycled Water Contribution	van der Nagel et al. 2025
rwc	NA							all	312	2.766	6.8914	uniform	Percent Recycled Water Contribution	van der Nagel et al. 2025
rwc	NA							all	297	2.6367	5.2758	uniform	Percent Recycled Water Contribution	van der Nagel et al. 2025
rwc	NA							fall	329	4.3443	5.4177	uniform	Percent Recycled Water Contribution	van der Nagel et al. 2025
rwc	NA							fall	312	4.3627	5.3564	uniform	Percent Recycled Water Contribution	van der Nagel et al. 2025
rwc	NA							fall	297	3.5313	3.6326	uniform	Percent Recycled Water Contribution	van der Nagel et al. 2025
rwc	NA							spring	329	1.918	2.3944	uniform	Percent Recycled Water Contribution	van der Nagel et al. 2025
rwc	NA							spring	312	2.766	3.1635	uniform	Percent Recycled Water Contribution	van der Nagel et al. 2025
rwc	NA							spring	297	4.101	4.707	uniform	Percent Recycled Water Contribution	van der Nagel et al. 2025
rwc	NA							summer	329	3.4801	4.7571	uniform	Percent Recycled Water Contribution	van der Nagel et al. 2025
rwc	NA							summer	312	5.3145	6.8914	uniform	Percent Recycled Water Contribution	van der Nagel et al. 2025
rwc	NA							summer	297	4.4563	5.2758	uniform	Percent Recycled Water Contribution	van der Nagel et al. 2025
rwc	NA							winter	329	3.3963	3.564	uniform	Percent Recycled Water Contribution	van der Nagel et al. 2025
rwc	NA							winter	312	2.9914	3.5593	uniform	Percent Recycled Water Contribution	van der Nagel et al. 2025
rwc	NA							winter	297	2.6367	3.2719	uniform	Percent Recycled Water Contribution	van der Nagel et al. 2025
t_lm	NA	defined separately	defined separately					all	329			empirical	LM Travel Time (h) - lake level 1	this study
t_lm	NA	defined separately	defined separately					all	312			empirical	LM Travel Time (h) - lake level 2	this study
t_lm	NA	defined separately	defined separately					all	297			empirical	LM Travel Time (h) - lake level 3	this study
t_lm	NA	defined separately	defined separately					fall	329			empirical	LM Travel Time (h) - lake level 1	this study
t_lm	NA	defined separately	defined separately					spring	329			empirical	LM Travel Time (h) - lake level 1	this study
t_lm	NA	defined separately	defined separately					winter	329			empirical	LM Travel Time (h) - lake level 1	this study
t_lm	NA	defined separately	defined separately					summer	329			empirical	LM Travel Time (h) - lake level 1	this study
t_lvw	NA	11.98		NA	NA	NA	3	noseason	all	NA	NA	point	LVW Travel Time (h)	Blasius et al. 2016
t_lvw	NA	13.48		NA	NA	NA	2	noseason	all	NA	NA	point	LVW Travel Time (h)	Blasius et al. 2016
t_lvw	NA	7.48		NA	NA	NA	4	noseason	all	NA	NA	point	LVW Travel Time (h)	Blasius et al. 2016
t_lvw	NA	15.48		NA	NA	NA	1	noseason	all	NA	NA	point	LVW Travel Time (h)	Blasius et al. 2016
