# Supplementary material for: Quantitative microbial risk assessment of the impact of drought and seasonality on a de facto reuse system in Southern Nevada, USA
Source: Royal Society of Chemistry journal article supplement (doi:10.1039/d5ew00514k), 2025-12-22
Supplement: d5ew00514k4.xlsx [file d5ew00514k4.xlsx]

## Sheet: 329m
hours	concentration
0	0
1	0
2	1.58327e-29
3	7.15294e-23
4	7.34115e-23
5	8.0994e-23
6	1.28176e-17
7	6.94525e-16
8	1.75598e-15
9	3.18434e-15
10	3.93048e-15
11	4.19186e-15
12	4.82121e-15
13	6.06905e-15
14	8.01176e-15
15	9.79045e-15
16	1.07905e-14
17	9.00441e-15
18	6.99828e-15
19	5.7547e-15
20	3.3981e-15
21	9.3581e-16
22	6.04597e-16
23	3.47168e-15
24	5.47942e-15
25	7.82279e-15
26	2.52634e-14
27	1.26911e-10
28	5.05073e-09
29	3.71028e-08
30	7.38892e-08
31	6.36713e-08
32	6.16371e-08
33	6.61738e-08
34	7.34063e-08
35	8.78054e-08
36	1.05558e-07
37	1.42803e-07
38	2.0139e-07
39	3.00355e-07
40	5.87264e-07
41	1.35012e-06
42	2.92441e-06
43	5.54937e-06
44	9.40197e-06
45	1.4025e-05
46	1.84e-05
47	1.71682e-05
48	1.3032e-05
49	1.07555e-05
50	8.99396e-06
51	7.78543e-06
52	8.72847e-06
53	9.99463e-06
54	1.22332e-05
55	1.68369e-05
56	2.31239e-05
57	3.0674e-05
58	3.78085e-05
59	4.17542e-05
60	4.29382e-05
61	4.20705e-05
62	4.23537e-05
63	4.58919e-05
64	4.81678e-05
65	4.83916e-05
66	4.81107e-05
67	4.86005e-05
68	4.94797e-05
69	5.02637e-05
70	5.09666e-05
71	5.16231e-05
72	5.20509e-05
73	5.18739e-05
74	5.07822e-05
75	4.86916e-05
76	4.59488e-05
77	4.37786e-05
78	4.30075e-05
79	4.20947e-05
80	4.07655e-05
81	3.9819e-05
82	3.91033e-05
83	3.82374e-05
84	3.69144e-05
85	3.28439e-05
86	2.56025e-05
87	2.09084e-05
88	1.88718e-05
89	1.75741e-05
90	1.57674e-05
91	1.50345e-05
92	1.78373e-05
93	5.46912e-05
94	0.000110531
95	0.000148003
96	0.000165979
97	0.000171416
98	0.000172482
99	0.000200142
100	0.00022941
101	0.000234694
102	0.000237685
103	0.000244541
104	0.000237126
105	0.000207913
106	0.000178031
107	0.000157689
108	0.000159176
109	0.000160239
110	0.000151561
111	0.000149768
112	0.00016141
113	0.000168579
114	0.000168105
115	0.000170542
116	0.000185571
117	0.000208629
118	0.000251351
119	0.000285485
120	0.000296725
121	0.000302016
122	0.000305237
123	0.000298566
124	0.000278486
125	0.00025176
126	0.000227264
127	0.000211163
128	0.000208609
129	0.000206486
130	0.000199763
131	0.000193696
132	0.000192747
133	0.000195928
134	0.000197739
135	0.000196611
136	0.000192352
137	0.000182232
138	0.000164654
139	0.000144368
140	0.000136854
141	0.000134787
142	0.000140386
143	0.000158234
144	0.000177812
145	0.000187417
146	0.000186633
147	0.000184822
148	0.000172895
149	0.000152375
150	0.000141182
151	0.000135179
152	0.000131951
153	0.00012604
154	0.000122546
155	0.000124128
156	0.000124675
157	0.00011981
158	0.000112727
159	0.000105133
160	0.000101193
161	9.90603e-05
162	9.49448e-05
163	9.44136e-05
164	0.000118477
165	0.000160356
166	0.000207095
167	0.00027873
168	0.000392671
169	0.000506998
170	0.000541635
171	0.000527016
172	0.000458961
173	0.000363586
174	0.000351492
175	0.00040904
176	0.000547781
177	0.00077173
178	0.00101787
179	0.00122041
180	0.00137812
181	0.0014385
182	0.00144596
183	0.00139722
184	0.00150804
185	0.00168608
186	0.00187432
187	0.00191577
188	0.00180971
189	0.00183121
190	0.00199358
191	0.00215232
192	0.00230494
193	0.00239004
194	0.00246866
195	0.00250764
196	0.00249892
197	0.00246404
198	0.00244102
199	0.00242623
200	0.00240757
201	0.00237492
202	0.00231204
203	0.00226038
204	0.0022477
205	0.0021839
206	0.00213597
207	0.00209954
208	0.00205975
209	0.00203127
210	0.00200766
211	0.00197467
212	0.00191075
213	0.00184488
214	0.00180354
215	0.00176406
216	0.00173212
217	0.00170503
218	0.00167628
219	0.00163499
220	0.00163632
221	0.00163711
222	0.00164192
223	0.00157588
224	0.00145576
225	0.00133111
226	0.00126628
227	0.00122562
228	0.00123168
229	0.00120292
230	0.0011359
231	0.00105079
232	0.00102491
233	0.00105335
234	0.00101587
235	0.000944734
236	0.000913287
237	0.000879864
238	0.000813536
239	0.000757598
240	0.000746351
241	0.000771758
242	0.000820636
243	0.000856332
244	0.000887294
245	0.00089441
246	0.000926355
247	0.000990501
248	0.00101605
249	0.00097106
250	0.000946308
251	0.000934861
252	0.000773417
253	0.00071019
254	0.000729024
255	0.000755793
256	0.000837668
257	0.00107139
258	0.00129613
259	0.00147329
260	0.00150386
261	0.00137735
262	0.00124036
263	0.00119002
264	0.00115594
265	0.00136698
266	0.0015471
267	0.00157384
268	0.00156506
269	0.00161844
270	0.00170795
271	0.00169952
272	0.00172926
273	0.00182541
274	0.00182807
275	0.00183376
276	0.00187328
277	0.00194545
278	0.00185016
279	0.00170554
280	0.00162211
281	0.00156515
282	0.00154748
283	0.00154611
284	0.0015906
285	0.00163279
286	0.00165315
287	0.00184597
288	0.00195996
289	0.00186544
290	0.00193855
291	0.0020934
292	0.00218881
293	0.00237906
294	0.00249216
295	0.00249565
296	0.00240189
297	0.0024449
298	0.00252208
299	0.00253664
300	0.00245903
301	0.00240389
302	0.00249999
303	0.00260825
304	0.00280765
305	0.00281264
306	0.0027243
307	0.00257449
308	0.00260828
309	0.00270466
310	0.00264791
311	0.00262572
312	0.00264831
313	0.00257253
314	0.00254915
315	0.00252536
316	0.00246019
317	0.00237597
318	0.00228221
319	0.00227534
320	0.0022294
321	0.00222214
322	0.0022279
323	0.00219828
324	0.00207238
325	0.0018832
326	0.00173158
327	0.00168088
328	0.00169002
329	0.00180032
330	0.00191008
331	0.00196759
332	0.0019902
333	0.00204819
334	0.00208
335	0.00209434
336	0.0021509
337	0.00224784
338	0.00235782
339	0.00249124
340	0.00259083
341	0.00257278
342	0.00253438
343	0.00252539
344	0.00251922
345	0.00251871
346	0.00258955
347	0.00266765
348	0.0027048
349	0.00267025
350	0.00263778
351	0.00260974
352	0.00258902
353	0.00258673
354	0.00260915
355	0.00262383
356	0.00262396
357	0.00259082
358	0.00255955
359	0.0025138
360	0.00251699
361	0.00255683
362	0.00261596
363	0.00268192
364	0.00267621
365	0.00263676
366	0.0026096
367	0.00255312
368	0.00247737
369	0.00239925
370	0.00229816
371	0.00226184
372	0.00219607
373	0.00201994
374	0.00192695
375	0.00187231
376	0.00170538
377	0.00161016
378	0.00161792
379	0.00159609
380	0.0015734
381	0.00156596
382	0.00160026
383	0.00182502
384	0.00196064
385	0.00205315
386	0.00207184
387	0.00200856
388	0.00171834
389	0.00148936
390	0.00157284
391	0.00156716
392	0.00154292
393	0.00150217
394	0.00137718
395	0.00144747
396	0.00163359
397	0.00156779
398	0.00145086
399	0.0014997
400	0.00150396
401	0.00148602
402	0.00150217
403	0.00150411
404	0.0016042
405	0.0017718
406	0.00183688
407	0.00179261
408	0.00163628
409	0.00151952
410	0.00152471
411	0.00155576
412	0.00168489
413	0.00178171
414	0.00181604
415	0.00182577
416	0.00180688
417	0.00173875
418	0.00160141
419	0.00149087
420	0.00155353
421	0.00171964
422	0.00178566
423	0.00180336
424	0.00177588
425	0.00171757
426	0.00169531
427	0.0017016
428	0.00170533
429	0.00171768
430	0.00174214
431	0.00175018
432	0.00178424
433	0.00179146
434	0.00176596
435	0.0017391
436	0.00171026
437	0.00167712
438	0.0016653
439	0.00178276
440	0.00205299
441	0.00219462
442	0.00214801
443	0.00205024
444	0.00209614
445	0.00200261
446	0.00183721
447	0.00166513
448	0.00163595
449	0.0016453
450	0.00169559
451	0.00170402
452	0.00163003
453	0.00154229
454	0.00148215
455	0.00148733
456	0.00152777
457	0.00157927
458	0.00158172
459	0.00162299
460	0.00165147
461	0.00165637
462	0.00161819
463	0.00160126
464	0.00167038
465	0.00165389
466	0.00158203
467	0.00155676
468	0.00149378
469	0.00138122
470	0.00135765
471	0.00138308
472	0.00142764
473	0.0014566
474	0.00147985
475	0.0015546
476	0.00158809
477	0.00152051
478	0.00142119
479	0.00129224
480	0.00124717
481	0.00128993
482	0.00134981
483	0.00135313
484	0.00132209
485	0.00130103
486	0.00130698
487	0.0013222
488	0.0013194
489	0.00133414
490	0.00138075
491	0.00140856
492	0.00141703
493	0.00140779
494	0.00138498
495	0.00134962
496	0.00129047
497	0.00124652
498	0.0012399
499	0.00122641
500	0.00120849
501	0.00121031
502	0.00123951
503	0.00124051
504	0.00124303
505	0.00137034
506	0.00149991
507	0.00148152
508	0.00150213
509	0.00151237
510	0.00152446
511	0.00161374
512	0.00168964
513	0.00160305
514	0.00152996
515	0.00154442
516	0.00160521
517	0.00157816
518	0.00161732
519	0.00171191
520	0.00177412
521	0.00175958
522	0.00168487
523	0.00159641
524	0.00160593
525	0.00155628
526	0.00157039
527	0.00160403
528	0.00159492
529	0.00161572
530	0.00164984
531	0.00167124
532	0.00173566
533	0.00174831
534	0.00184006
535	0.00184595
536	0.00173622
537	0.00164398
538	0.00161467
539	0.00159449
540	0.00155046
541	0.00153067
542	0.00159886
543	0.00164341
544	0.00169066
545	0.00172989
546	0.00174601
547	0.00166473
548	0.00150932
549	0.00140252
550	0.00137381
551	0.00142403
552	0.00152107
553	0.00154889
554	0.00154054
555	0.00161345
556	0.00166515
557	0.00168422
558	0.00158187
559	0.0015805
560	0.00166072
561	0.00175491
562	0.00183599
563	0.001847
564	0.0018348
565	0.00175269
566	0.00171678
567	0.00179834
568	0.00185335
569	0.00182679
570	0.00174735
571	0.00168117
572	0.00167347
573	0.00164496
574	0.0016516
575	0.00168959
576	0.00168114
577	0.00165221
578	0.00162965
579	0.00168496
580	0.00175987
581	0.00179395
582	0.00178616
583	0.00177157
584	0.00174261
585	0.00171519
586	0.00171665
587	0.00173256
588	0.0017032
589	0.00170374
590	0.00174185
591	0.00174075
592	0.00174549
593	0.0016493
594	0.0015941
595	0.00157679
596	0.00157359
597	0.00161343
598	0.00166002
599	0.00168103
600	0.00167039
601	0.00164709
602	0.00161572
603	0.00159252
604	0.00160625
605	0.0016444
606	0.00165497
607	0.00165061
608	0.0016473
609	0.00163086
610	0.0015937
611	0.00156082
612	0.00153436
613	0.00151888
614	0.00148064
615	0.00145062
616	0.00143879
617	0.00142547
618	0.00143397
619	0.00143896
620	0.00143164
621	0.00143113
622	0.00140115
623	0.00133039
624	0.00127533
625	0.00127927
626	0.00131371
627	0.00133961
628	0.00137675
629	0.00142079
630	0.00141468
631	0.00139804
632	0.00134905
633	0.00135832
634	0.00134418
635	0.00132744
636	0.00139607
637	0.00144908
638	0.0014729
639	0.00147881
640	0.00149336
641	0.00149572
642	0.00151724
643	0.00154022
644	0.00154957
645	0.00157153
646	0.00159262
647	0.00160639
648	0.00160394
649	0.00159498
650	0.0015935
651	0.00158523
652	0.00156311
653	0.00155233
654	0.00156751
655	0.00159793
656	0.00161462
657	0.0016261
658	0.00163323
659	0.0016869
660	0.00169975
661	0.00165923
662	0.00157341
663	0.00150893
664	0.00151686
665	0.00156942
666	0.00158795
667	0.00159268
668	0.00158653
669	0.00157569
670	0.00162839
671	0.00164374
672	0.00159372
673	0.0015232
674	0.00143515
675	0.00138799
676	0.00137915
677	0.00140541
678	0.0014457
679	0.00150035
680	0.0015151
681	0.00150983
682	0.00147319
683	0.00140805
684	0.00138372
685	0.00137556
686	0.00136968
687	0.00136318
688	0.00135493
689	0.00134857
690	0.00133641
691	0.00130976
692	0.00128501
693	0.00127326
694	0.00125924
695	0.00123236
696	0.00120423
697	0.00118281
698	0.00116937
699	0.00115965
700	0.00115411
701	0.00115576
702	0.00115202
703	0.00114973
704	0.00115919
705	0.00116248
706	0.0011543
707	0.00115998
708	0.00117574
709	0.00121171
710	0.00124529
711	0.00125913
712	0.00130523
713	0.00132134
714	0.00125643
715	0.00119189
716	0.00121466
717	0.00124399
718	0.00125908
719	0.00126109
720	0.00126024
721	0.00123414
722	0.00120791
723	0.00119244
724	0.0011625
725	0.00113653
726	0.0011377
727	0.00115565
728	0.00117058
729	0.00116605
730	0.00115435
731	0.00114536
732	0.00113696
733	0.0011196
734	0.00108502
735	0.00106152
736	0.00106274
737	0.00104649
738	0.00103158
739	0.00102424
740	0.00102624
741	0.00102758
742	0.001022
743	0.00101298
744	0.00100343
745	0.000995885
746	0.000992473
747	0.000982945
748	0.000969902
749	0.000963713
750	0.000956822
751	0.0009469
752	0.000939449
753	0.000935648
754	0.000922251
755	0.000918589
756	0.000954012
757	0.000981451
758	0.00100797
759	0.00103336
760	0.00104719
761	0.00105005
762	0.00105679
763	0.00107177
764	0.00106645
765	0.0010467
766	0.00104336
767	0.00104689
768	0.00105027
769	0.00105376
770	0.00106108
771	0.00107783
772	0.00110887
773	0.00114149
774	0.00117279
775	0.00119828
776	0.00121741
777	0.00123136
778	0.00125038
779	0.00126268
780	0.00125236
781	0.00124212
782	0.00125278
783	0.00126452
784	0.00126786
785	0.00127893
786	0.0013135
787	0.00134103
788	0.00134994
789	0.00135578
790	0.00136295
791	0.00137018
792	0.00136941
793	0.00137609
794	0.0013876
795	0.00139379
796	0.00139315
797	0.001399
798	0.00140479
799	0.00139132
800	0.00139413
801	0.00140568
802	0.00140333
803	0.00140274
804	0.00141065
805	0.00141878
806	0.00142443
807	0.00142521
808	0.00141885
809	0.00139826
810	0.0013837
811	0.00137132
812	0.0013599
813	0.00135449
814	0.00135506
815	0.00135936
816	0.00137161
817	0.00138406
818	0.00138553
819	0.00137411
820	0.00135147
821	0.00134633
822	0.00133762
823	0.00131879
824	0.00132663
825	0.00132815
826	0.00132867
827	0.00132969
828	0.00132175
829	0.001313
830	0.0013131
831	0.00131461
832	0.00131035
833	0.0012961
834	0.00127815
835	0.00126386
836	0.00125998
837	0.001252
838	0.00124536
839	0.00124206
840	0.00123392
841	0.00122276
842	0.00121311
843	0.00120828
844	0.00120205
845	0.00118785
846	0.00117604
847	0.00116656
848	0.00115154
849	0.00113346
850	0.00112472
851	0.00111425
852	0.00110016
853	0.00109047
854	0.00107874
855	0.0010603
856	0.00103541
857	0.00103045
858	0.00103483
859	0.00103873
860	0.00103992
861	0.00104557
862	0.00104588
863	0.00104845
864	0.00104156
865	0.00103608
866	0.0010359
867	0.00103631
868	0.00104434
869	0.00105448
870	0.00106066
871	0.0010643
872	0.00106863
873	0.0010571
874	0.00104414
875	0.00104495
876	0.00104572
877	0.0010357
878	0.00102041
879	0.00101187
880	0.00100299
881	0.000989707
882	0.000986735
883	0.000988338
884	0.000984106
885	0.000985452
886	0.00100963
887	0.00100727
888	0.000996003
889	0.000992151
890	0.00095767
891	0.000994995
892	0.00101013
893	0.00100595
894	0.00100682
895	0.00100661
896	0.00100722
897	0.00100417
898	0.000998665
899	0.000986451
900	0.00097877
901	0.000970423
902	0.000949896
903	0.000951923
904	0.000956978
905	0.000959077
906	0.000961581
907	0.000974806
908	0.0009954
909	0.00100584
910	0.00100906
911	0.000980761
912	0.000949954
913	0.000952819
914	0.000934153
915	0.000837713
916	0.000755787
917	0.000832762
918	0.000939109
919	0.000949272
920	0.00094205
921	0.000944968
922	0.000931899
923	0.000903491
924	0.000906376
925	0.000918151
926	0.00089016
927	0.000880443
928	0.000888875
929	0.000896202
930	0.000902786
931	0.000909723
932	0.00092264
933	0.000923713
934	0.000926224
935	0.000918873
936	0.000916054
937	0.000913975
938	0.00090822
939	0.000918734
940	0.000929446
941	0.000933185
942	0.000925292
943	0.000914633
944	0.00090294
945	0.000881398
946	0.000853925
947	0.000836603
948	0.000834518
949	0.000832845
950	0.000855408
951	0.000916958
952	0.000939924
953	0.000941147
954	0.000937251
955	0.000921547
956	0.000895782
957	0.00086079
958	0.000837772
959	0.000830158
960	0.000822896
961	0.000841444
962	0.00090213
963	0.00094327
964	0.000944242
965	0.000933635
966	0.000918956
967	0.000891803
968	0.000882262
969	0.000886698
970	0.000879109
971	0.000867618
972	0.000858982
973	0.000851347
974	0.000844665
975	0.00083552
976	0.000826971
977	0.000818441
978	0.000808001
979	0.000812279
980	0.000819508
981	0.0008169
982	0.000812352
983	0.000808227
984	0.00080338
985	0.000787229
986	0.000766658
987	0.00076786
988	0.000771952
989	0.000775688
990	0.000784968
991	0.000796648
992	0.000807696
993	0.000816073
994	0.00081125
995	0.000794644
996	0.000777946
997	0.000777025
998	0.000776437
999	0.000770725
1000	0.000764065
1001	0.000762037
1002	0.000763946
1003	0.000768534
1004	0.000773274
1005	0.000771952
1006	0.000762778
1007	0.000747078
1008	0.000734385
1009	0.000719947
1010	0.000717996
1011	0.000715757
1012	0.00072082
1013	0.000735462
1014	0.000751291
1015	0.000767664
1016	0.000779885
1017	0.000785356
1018	0.000800431
1019	0.000808825
1020	0.000812312
1021	0.000814422
1022	0.000820957
1023	0.000826993
1024	0.000834495
1025	0.000847739
1026	0.00085646
1027	0.000861297
1028	0.00086416
1029	0.000871125
1030	0.000878718
1031	0.000882309
1032	0.000875107
1033	0.00086636
1034	0.000893341
1035	0.000929365
1036	0.000950452
1037	0.000960942
1038	0.000975294
1039	0.000967519
1040	0.000956557
1041	0.000946665
1042	0.000947704
1043	0.00094173
1044	0.000944584
1045	0.0009612
1046	0.000995555
1047	0.0010156
1048	0.00101481
1049	0.0010089
1050	0.000993121
1051	0.000983319
1052	0.000969884
1053	0.000937101
1054	0.000920901
1055	0.000932994
1056	0.000952002
1057	0.000968587
1058	0.000972252
1059	0.000965254
1060	0.000949492
1061	0.0009247
1062	0.000925342
1063	0.000953183
1064	0.000949504
1065	0.000936688
1066	0.000924786
1067	0.000913832
1068	0.000902593
1069	0.00088641
1070	0.000865468
1071	0.000865636
1072	0.000865099
1073	0.000865491
1074	0.000867256
1075	0.000866249
1076	0.000863846
1077	0.000861522
1078	0.000857449
1079	0.000842132
1080	0.000838108
1081	0.000842281
1082	0.0008422
1083	0.000842929
1084	0.000840566
1085	0.000835773
1086	0.000828719
1087	0.000820767
1088	0.000823822
1089	0.000823468
1090	0.000819173
1091	0.000816611
1092	0.000816132
1093	0.00080895
1094	0.000798074
1095	0.000795449
1096	0.000804323
1097	0.00080937
1098	0.000812956
1099	0.000816703
1100	0.000819196
1101	0.000823239
1102	0.000828905
1103	0.000837142
1104	0.000849013
1105	0.000860855
1106	0.000862916
1107	0.000844957
1108	0.000818778
1109	0.000817933
1110	0.000826242
1111	0.000824105
1112	0.000823397
1113	0.000831608
1114	0.00083606
1115	0.000836441
1116	0.00083231
1117	0.000814412
1118	0.000807937
1119	0.000795963
1120	0.000779647
1121	0.000785489
1122	0.000805026
1123	0.000820962
1124	0.000832225
1125	0.000834656
1126	0.000838193
1127	0.000844816
1128	0.000843001
1129	0.000836972
1130	0.000832262
1131	0.000828653
1132	0.000823299
1133	0.0008158
1134	0.000802297
1135	0.000789006
1136	0.000783851
1137	0.000782913
1138	0.000785668
1139	0.000791736
1140	0.000794869
1141	0.000791173
1142	0.000784102
1143	0.000776332
1144	0.000779862
1145	0.000791568
1146	0.0007974
1147	0.000790272
1148	0.000771616
1149	0.000750966
1150	0.000757202
1151	0.000754617
1152	0.000749201
1153	0.000746942
1154	0.000760552
1155	0.000776067
1156	0.00078424
1157	0.000783363
1158	0.000777765
1159	0.000772139
1160	0.000765093
1161	0.000753949
1162	0.000743032
1163	0.00072477
1164	0.000714558
1165	0.000715829
1166	0.000711957
1167	0.000710237
1168	0.000710235
1169	0.000704975
1170	0.000690524
1171	0.000668275
1172	0.000658724
1173	0.000669084
1174	0.000691123
1175	0.000727473
1176	0.000754564
1177	0.000764976
1178	0.00076726
1179	0.00076658
1180	0.000766825
1181	0.00076667
1182	0.000765234
1183	0.000765098
1184	0.00076405
1185	0.000761252
1186	0.000739283
1187	0.000716414
1188	0.000710541
1189	0.000708776
1190	0.000712016
1191	0.000709984
1192	0.00071217
1193	0.0007201
1194	0.000738492
1195	0.000752323
1196	0.000758701
1197	0.000762424
1198	0.00076735
1199	0.000764093
1200	0.000761363
1201	0.000754833
1202	0.000747313
1203	0.00074259
1204	0.000721893
1205	0.000705203
1206	0.000692531
1207	0.000674593
1208	0.000662151
1209	0.000671639
1210	0.000684066
1211	0.000690547
1212	0.000682776
1213	0.000665887
1214	0.000670454
1215	0.000683893
1216	0.000686469
1217	0.000678619
1218	0.000667894
1219	0.000675411
1220	0.000689767
1221	0.00069498
1222	0.000686113
1223	0.000668782
1224	0.000645606
1225	0.00064465
1226	0.0006216
1227	0.000626758
1228	0.000624705
1229	0.000623742
1230	0.000599906
1231	0.000551499
1232	0.000516603
1233	0.000494552
1234	0.000472425
1235	0.000476463
1236	0.000482527
1237	0.000471879
1238	0.000472135
1239	0.000477273
1240	0.000504157
1241	0.000518195
1242	0.000523209
1243	0.000541564
1244	0.000585106
1245	0.000604683
1246	0.000641078
1247	0.000687842
1248	0.000698209
1249	0.000710502
1250	0.00071745
1251	0.000700437
1252	0.000695542
1253	0.000713704
1254	0.000733968
1255	0.000737708
1256	0.00073636
1257	0.000725931
1258	0.000710147
1259	0.000703358
1260	0.00070066
1261	0.000690029
1262	0.000693078
1263	0.000686274
1264	0.000680154
1265	0.000684664
1266	0.000697589
1267	0.000701423
1268	0.00071097
1269	0.000723209
1270	0.000725989
1271	0.000722434
1272	0.000719714
1273	0.000716613
1274	0.000717144
1275	0.000716535
1276	0.000707755
1277	0.000669555
1278	0.00064875
1279	0.000629186
1280	0.000614958
1281	0.000605954
1282	0.000602161
1283	0.000609057
1284	0.000606529
1285	0.000596871
1286	0.000584558
1287	0.000576156
1288	0.000562281
1289	0.000555074
1290	0.000557337
1291	0.000556641
1292	0.000556494
1293	0.000557047
1294	0.000563639
1295	0.000570388
1296	0.000570348
1297	0.000571635
1298	0.000583436
1299	0.000572483
1300	0.000559543
1301	0.000544412
1302	0.000542452
1303	0.000559697
1304	0.000574916
1305	0.00057801
1306	0.000587214
1307	0.000596158
1308	0.000597665
1309	0.000596478
1310	0.000592055
1311	0.00058351
1312	0.000572947
1313	0.000570271
1314	0.00056777
1315	0.000565313
1316	0.000564895
1317	0.000571253
1318	0.000583025
1319	0.000588949
1320	0.000590813
1321	0.000593414
1322	0.000588362
1323	0.000575505
1324	0.000559264
1325	0.000549515
1326	0.000548724
1327	0.00055612
1328	0.000568386
1329	0.00055047
1330	0.000505598
1331	0.000482311
1332	0.000470888
1333	0.000465274
1334	0.000469703
1335	0.000478209
1336	0.000476703
1337	0.000471156
1338	0.000465467
1339	0.000461895
1340	0.000455179
1341	0.000459728
1342	0.000460555
1343	0.000451989
1344	0.000442773
1345	0.000435569
1346	0.000429626
1347	0.000423897
1348	0.000417413
1349	0.000410966
1350	0.000418251
1351	0.000427547
1352	0.00043096
1353	0.000431159
1354	0.000428098
1355	0.000416223
1356	0.000402076
1357	0.000383773
1358	0.000381522
1359	0.000387656
1360	0.000398916
1361	0.000418113
1362	0.000427798
1363	0.000432814
1364	0.000435318
1365	0.000435769
1366	0.000435304
1367	0.000437256
1368	0.000436116
1369	0.000423331
1370	0.000402843
1371	0.000397665
1372	0.000400598
1373	0.000406244
1374	0.000423071
1375	0.000443217
1376	0.00043887
1377	0.000435757
1378	0.000437925
1379	0.000433519
1380	0.000435056
1381	0.000441984
1382	0.000442234
1383	0.000440425
1384	0.000436486
1385	0.000431809
1386	0.000427256
1387	0.000429445
1388	0.000435039
1389	0.000437224
1390	0.000436607
1391	0.000434523
1392	0.000432465
1393	0.000427794
1394	0.000417518
1395	0.00041207
1396	0.00041854
1397	0.000405632
1398	0.000388828
1399	0.000405689
1400	0.000425182
1401	0.000427801
1402	0.000435302
1403	0.000441081
1404	0.000445924
1405	0.000445865
1406	0.00044362
1407	0.000442134
1408	0.000423293
1409	0.000417099
1410	0.000428229
1411	0.000429761
1412	0.000435082
1413	0.000445996
1414	0.000454106
1415	0.000457251
1416	0.000462577
1417	0.000463782
1418	0.000462208
1419	0.000476897
1420	0.000500746
1421	0.000522203
1422	0.000533215
1423	0.000535376
1424	0.000527282
1425	0.000515319
1426	0.000509092
1427	0.000514191
1428	0.000525781
1429	0.000535195
1430	0.000543917
1431	0.000549533
1432	0.000552567
1433	0.000554912
1434	0.000561055
1435	0.000564966
1436	0.000563676
1437	0.0005607
1438	0.00055938
1439	0.000558337
1440	0.000558136
1441	0.000561592
1442	0.000564397
1443	0.000566453
1444	0.000568177
1445	0.000571119
1446	0.000572271
1447	0.000572319
1448	0.000570009
1449	0.000565676
1450	0.000563149
1451	0.000563266
1452	0.000562449
1453	0.000559675
1454	0.000553885
1455	0.000548676
1456	0.000546991
1457	0.000547139
1458	0.000548904
1459	0.000553323
1460	0.000556728
1461	0.000557629
1462	0.000554912
1463	0.000551486
1464	0.000547026
1465	0.000541086
1466	0.000534893
1467	0.000530056
1468	0.000527997
1469	0.000530979
1470	0.000542514
1471	0.000550912
1472	0.00054855
1473	0.000540621
1474	0.000535814
1475	0.000537413
1476	0.000539144
1477	0.000536557
1478	0.000531455
1479	0.000525428
1480	0.000521964
1481	0.000521319
1482	0.000521273
1483	0.000528353
1484	0.000533191
1485	0.000535184
1486	0.000532989
1487	0.000526801
1488	0.000522712
1489	0.000520362
1490	0.000517177
1491	0.000513045
1492	0.000508387
1493	0.000507146
1494	0.000511021
1495	0.000514127
1496	0.000509723
1497	0.000510821
1498	0.000515295
1499	0.000517625
1500	0.000518032
1501	0.000520018
1502	0.000521027
1503	0.0005216
1504	0.00051917
1505	0.000516036
1506	0.000516165
1507	0.000518268
1508	0.000519476
1509	0.000522299
1510	0.000525538
1511	0.000528654
1512	0.000530566
1513	0.000530294
1514	0.000532187
1515	0.0005341
1516	0.000535217
1517	0.00053653
1518	0.000537457
1519	0.000536879
1520	0.000535776
1521	0.000534487
1522	0.000532185
1523	0.000529523
1524	0.00052639
1525	0.000523794
1526	0.00052327
1527	0.000523717
1528	0.000524424
1529	0.000526962
1530	0.000531548
1531	0.000535394
1532	0.000538075
1533	0.000541023
1534	0.000543262
1535	0.000544053
1536	0.000544325
1537	0.000543863
1538	0.000541687
1539	0.000536352
1540	0.000531779
1541	0.0005311
1542	0.000533554
1543	0.000537037
1544	0.000539061
1545	0.000538333
1546	0.000536698
1547	0.000534726
1548	0.000531416
1549	0.000525419
1550	0.000521129
1551	0.000518209
1552	0.000516151
1553	0.000515091
1554	0.000516843
1555	0.000520713
1556	0.000527225
1557	0.000531744
1558	0.000532951
1559	0.000533137
1560	0.000531405
1561	0.000529757
1562	0.000528043
1563	0.000526181
1564	0.000523778
1565	0.000519898
1566	0.000519981
1567	0.000517847
1568	0.00050942
1569	0.000495497
1570	0.000503988
1571	0.000509785
1572	0.00050651
1573	0.000502329
1574	0.000507066
1575	0.000513482
1576	0.000517444
1577	0.000513547
1578	0.000510302
1579	0.00051546
1580	0.000516099
1581	0.000494567
1582	0.00054966
1583	0.000505793
1584	0.000523327
1585	0.000519817
1586	0.0005116
1587	0.000514159
1588	0.000499543
1589	0.000499897
1590	0.000481925
1591	0.00047627
1592	0.000485328
1593	0.000488267
1594	0.000493378
1595	0.000491233
1596	0.000482643
1597	0.000472375
1598	0.000461774
1599	0.000468254
1600	0.000467025
1601	0.00047735
1602	0.000475206
1603	0.00048184
1604	0.000477231
1605	0.000474887
1606	0.00047115
1607	0.000476111
1608	0.000462075
1609	0.00045278
1610	0.000437006
1611	0.000424473
1612	0.000411101
1613	0.00040582
1614	0.000406238
1615	0.000416688
1616	0.000428657
1617	0.00044086
1618	0.000436975
1619	0.000430443
1620	0.000418783
1621	0.000405744
1622	0.000392432
1623	0.000384921
1624	0.000385507
1625	0.000388371
1626	0.000394576
1627	0.00039652
1628	0.000395233
1629	0.000395799
1630	0.000399141
1631	0.000405518
1632	0.000410343
1633	0.000413588
1634	0.000413324
1635	0.000406658
1636	0.000403492
1637	0.000400973
1638	0.000394338
1639	0.000389136
1640	0.000388755
1641	0.000392738
1642	0.000402641
1643	0.000402443
1644	0.000399352
1645	0.000394664
1646	0.000393463
1647	0.000403078
1648	0.000416166
1649	0.000415791
1650	0.000402779
1651	0.000394706
1652	0.000399117
1653	0.000400448
1654	0.000400762
1655	0.000403372
1656	0.0004015
1657	0.000399322
1658	0.000397923
1659	0.000397824
1660	0.000399975
1661	0.000400681
1662	0.00039781
1663	0.000392707
1664	0.000386394
1665	0.000380257
1666	0.000377248
1667	0.00037593
1668	0.000376229
1669	0.000378549
1670	0.000377902
1671	0.000382498
1672	0.000389381
1673	0.000391628
1674	0.000389398
1675	0.00038561
1676	0.000382708
1677	0.00037857
1678	0.000375108
1679	0.000371356
1680	0.000367651
1681	0.000366336
1682	0.000365058
1683	0.000360535
1684	0.000355123
1685	0.000355995
1686	0.000360457
1687	0.000360599
1688	0.000349315
1689	0.000329869
1690	0.000317702
1691	0.000313136
1692	0.000312352
1693	0.000311674
1694	0.000310698
1695	0.00031043
1696	0.000312693
1697	0.000308874
1698	0.000296159
1699	0.000285116
1700	0.000278983
1701	0.000275065
1702	0.000271889
1703	0.000269255
1704	0.000268651
1705	0.000275359
1706	0.00029468
1707	0.000309743
1708	0.00032214
1709	0.000324807
1710	0.000316951
1711	0.000309665
1712	0.00031233
1713	0.000314785
1714	0.000314981
1715	0.000317345
1716	0.000318593
1717	0.000318607
1718	0.000322912
1719	0.000334984
1720	0.000343559
1721	0.000350057
1722	0.000355551
1723	0.00035814
1724	0.000357676
1725	0.000357923
1726	0.000361102
1727	0.00036553
1728	0.000369139
1729	0.000373482
1730	0.000373851
1731	0.000371889
1732	0.00037505
1733	0.00037699
1734	0.000376177
1735	0.000373184
1736	0.000368519
1737	0.00036038
1738	0.000354284
1739	0.000356758
1740	0.000360825
1741	0.000365111
1742	0.000369917
1743	0.000373139
1744	0.000374635
1745	0.000373487
1746	0.000369317
1747	0.000363187
1748	0.000359642
1749	0.000358494
1750	0.000358715
1751	0.000360436
1752	0.000362703
1753	0.000363606
1754	0.00036527
1755	0.000366253
1756	0.000366005
1757	0.000364612
1758	0.000362355
1759	0.000361665
1760	0.0003607
1761	0.000357612
1762	0.000352911
1763	0.000350851
1764	0.000353365
1765	0.000360065
1766	0.000365679
1767	0.00036721
1768	0.000366466
1769	0.00036547
1770	0.000365104
1771	0.000364978
1772	0.000364517
1773	0.000364439
1774	0.000368198
1775	0.000371316
1776	0.000372173
1777	0.000369337
1778	0.000361871
1779	0.000352752
1780	0.000346504
1781	0.000346899
1782	0.000353587
1783	0.000359899
1784	0.000361426
1785	0.000364924
1786	0.000365647
1787	0.00036731
1788	0.000368227
1789	0.000382712
1790	0.000388923
1791	0.000378667
1792	0.000370433
1793	0.000372641
1794	0.000375229
1795	0.000366447
1796	0.000355858
1797	0.000354291
1798	0.000360954
1799	0.00036759
1800	0.000375777
1801	0.000390272
1802	0.000387072
1803	0.000375589
1804	0.000372
1805	0.000370306
1806	0.00036506
1807	0.000361296
1808	0.000360705
1809	0.000364513
1810	0.000372469
1811	0.00037942
1812	0.000383352
1813	0.000388097
1814	0.000385744
1815	0.000383772
1816	0.000383765
1817	0.000382782
1818	0.000382421
1819	0.000381617
1820	0.000382205
1821	0.000385801
1822	0.000384167
1823	0.000384594
1824	0.000391071
1825	0.000395549
1826	0.000398971
1827	0.000403604
1828	0.000416197
1829	0.000439865
1830	0.000446727
1831	0.000434168
1832	0.000421236
1833	0.000407227
1834	0.000397205
1835	0.000396807
1836	0.000411194
1837	0.00042243
1838	0.000399888
1839	0.0003772
1840	0.000367603
1841	0.000364499
1842	0.000366557
1843	0.000372937
1844	0.000380795
1845	0.000384026
1846	0.000382868
1847	0.000379295
1848	0.000373624
1849	0.000377067
1850	0.000385812
1851	0.000388737
1852	0.000387585
1853	0.000375737
1854	0.000362005
1855	0.000352828
1856	0.000350957
1857	0.000356326
1858	0.000360543
1859	0.000367335
1860	0.000378208
1861	0.000389589
1862	0.000395134
1863	0.000400692
1864	0.000414699
1865	0.000422781
1866	0.00041232
1867	0.000407639
1868	0.000382026
1869	0.00038767
1870	0.000417556
1871	0.000454325
1872	0.000454535
1873	0.000504425
1874	0.00051164
1875	0.000512784
1876	0.000512435
1877	0.000509464
1878	0.000502709
1879	0.000499921
1880	0.000493923
1881	0.000455019
1882	0.000428415
1883	0.00039921
1884	0.000373795
1885	0.000361054
1886	0.000367888
1887	0.000413848
1888	0.000443595
1889	0.000464897
1890	0.000465656
1891	0.000456141
1892	0.000445086
1893	0.000448956
1894	0.00045426
1895	0.000454931
1896	0.000456234
1897	0.000446525
1898	0.000435327
1899	0.000432068
1900	0.000427292
1901	0.000428777
1902	0.000446829
1903	0.000457977
1904	0.00045183
1905	0.000446164
1906	0.000447691
1907	0.000447202
1908	0.000450206
1909	0.000444843
1910	0.000429047
1911	0.00041074
1912	0.000393704
1913	0.000378253
1914	0.000373615
1915	0.000383448
1916	0.000391945
1917	0.00039979
1918	0.000409099
1919	0.000419966
1920	0.000432031
1921	0.000438647
1922	0.000438759
1923	0.00043979
1924	0.000441089
1925	0.000446104
1926	0.000443642
1927	0.000437688
1928	0.000442203
1929	0.000435055
1930	0.000419662
1931	0.000416117
1932	0.000418422
1933	0.000422746
1934	0.00041911
1935	0.000422216
1936	0.000430692
1937	0.000422819
1938	0.000416527
1939	0.000421095
1940	0.000424647
1941	0.000430699
1942	0.000436522
1943	0.0004343
1944	0.000429757
1945	0.000426621
1946	0.000422337
1947	0.000414922
1948	0.000410828
1949	0.00040608
1950	0.000399773
1951	0.00039536
1952	0.000396712
1953	0.000407744
1954	0.000419001
1955	0.000428104
1956	0.000423246
1957	0.000418116
1958	0.000420075
1959	0.000426096
1960	0.000429551
1961	0.000426787
1962	0.000416334
1963	0.000405033
1964	0.000406385
1965	0.000408099
1966	0.00040497
1967	0.000402173
1968	0.000405792
1969	0.000409979
1970	0.000410957
1971	0.00041862
1972	0.000426051
1973	0.000425461
1974	0.000414298
1975	0.000404662
1976	0.000393763
1977	0.000401325
1978	0.00041855
1979	0.000428951
1980	0.000428495
1981	0.000416972
1982	0.000412025
1983	0.000423194
1984	0.00044077
1985	0.000451327
1986	0.000450837
1987	0.000435758
1988	0.000417538
1989	0.000408109
1990	0.000403752
1991	0.000411067
1992	0.000414983
1993	0.000416415
1994	0.000419825
1995	0.000428189
1996	0.000436956
1997	0.000436708
1998	0.000433029
[truncated: 15,521 more rows]

## Sheet: 312m
hours	concentration
0	0
1	0
2	5.20027e-26
3	1.16575e-25
4	1.38406e-25
5	4.16335e-15
6	1.54142e-14
7	1.77503e-14
8	7.46196e-15
9	1.76935e-15
10	4.02141e-16
11	4.86343e-14
12	1.0419e-12
13	2.2431e-12
14	2.36114e-12
15	4.06662e-12
16	2.12251e-11
17	5.13708e-11
18	7.04133e-11
19	7.32286e-11
20	3.25528e-11
21	1.83627e-11
22	1.16287e-11
23	8.19122e-12
24	6.92386e-12
25	6.04818e-12
26	4.9511e-12
27	3.26643e-12
28	3.00499e-12
29	4.81199e-12
30	4.95917e-12
31	3.29747e-12
32	7.759e-13
33	2.35353e-13
34	1.54796e-13
35	3.63411e-13
36	1.36658e-09
37	6.07408e-08
38	3.38329e-07
39	8.37903e-07
40	1.27287e-06
41	1.42651e-06
42	1.4445e-06
43	1.60255e-06
44	1.59008e-06
45	9.53213e-07
46	6.51266e-07
47	4.09443e-07
48	2.87018e-07
49	2.25902e-07
50	1.92645e-07
51	1.66754e-07
52	1.55907e-07
53	1.65298e-07
54	2.07908e-07
55	4.68275e-07
56	3.55325e-06
57	1.37436e-05
58	2.72373e-05
59	4.59288e-05
60	9.77968e-05
61	0.000185062
62	0.000191686
63	0.000167532
64	0.000142662
65	8.38379e-05
66	6.97022e-05
67	7.97866e-05
68	8.26459e-05
69	8.40238e-05
70	8.67429e-05
71	8.56875e-05
72	8.87309e-05
73	9.54257e-05
74	0.000103393
75	0.000104077
76	9.17113e-05
77	9.04655e-05
78	9.06636e-05
79	8.83848e-05
80	8.60144e-05
81	8.31152e-05
82	8.00436e-05
83	7.54259e-05
84	6.99676e-05
85	6.44911e-05
86	5.84149e-05
87	5.32089e-05
88	5.13596e-05
89	5.20197e-05
90	5.29114e-05
91	5.30248e-05
92	6.08228e-05
93	6.68664e-05
94	6.89836e-05
95	7.36759e-05
96	7.89276e-05
97	8.66284e-05
98	9.54582e-05
99	0.000105816
100	0.000115849
101	0.000114754
102	0.000109312
103	0.000104219
104	9.85487e-05
105	9.89589e-05
106	9.99412e-05
107	0.000105547
108	0.000122753
109	0.000131009
110	0.000123043
111	0.000120619
112	0.000122949
113	0.000123484
114	0.000129264
115	0.000166603
116	0.000188255
117	0.000232801
118	0.00031484
119	0.000333581
120	0.000285304
121	0.000263962
122	0.000501345
123	0.000814012
124	0.00088341
125	0.000934212
126	0.000964907
127	0.000940448
128	0.000885232
129	0.000873138
130	0.000872769
131	0.000871071
132	0.000872979
133	0.000879524
134	0.000829703
135	0.000677899
136	0.000607236
137	0.000636503
138	0.000656589
139	0.000639285
140	0.000587607
141	0.000535668
142	0.000520423
143	0.000529123
144	0.000547219
145	0.000584049
146	0.000632302
147	0.000626949
148	0.000546725
149	0.000441413
150	0.000419559
151	0.000473399
152	0.00047088
153	0.00044967
154	0.000418955
155	0.000387805
156	0.000357407
157	0.000325082
158	0.000289549
159	0.000256445
160	0.00021993
161	0.000201585
162	0.000198432
163	0.000202527
164	0.00022166
165	0.000256786
166	0.000309933
167	0.000404601
168	0.000504288
169	0.000614268
170	0.000697632
171	0.000733488
172	0.000788038
173	0.000865031
174	0.000873859
175	0.000863086
176	0.000776918
177	0.00078768
178	0.000833255
179	0.00104961
180	0.00137424
181	0.00155734
182	0.00150378
183	0.00125356
184	0.00101619
185	0.000816674
186	0.000742423
187	0.000725606
188	0.000829571
189	0.00126394
190	0.00157017
191	0.00169472
192	0.00176031
193	0.00169933
194	0.00168858
195	0.00180591
196	0.00188626
197	0.00186286
198	0.00184195
199	0.00188256
200	0.00190564
201	0.00186806
202	0.00184231
203	0.00178694
204	0.00168969
205	0.00157754
206	0.00146846
207	0.00137833
208	0.00134333
209	0.00133962
210	0.00142078
211	0.0014705
212	0.00130539
213	0.00118246
214	0.00114918
215	0.00123535
216	0.00139163
217	0.00147463
218	0.00144532
219	0.00153887
220	0.00153442
221	0.0015298
222	0.00163502
223	0.00180153
224	0.00198614
225	0.00220733
226	0.00231608
227	0.00222516
228	0.00209481
229	0.00208763
230	0.00213722
231	0.00224253
232	0.00225811
233	0.0021738
234	0.00202009
235	0.00196426
236	0.00192231
237	0.0019161
238	0.00188266
239	0.00190142
240	0.00198643
241	0.00216384
242	0.00220981
243	0.00208728
244	0.00194423
245	0.0018667
246	0.00187094
247	0.00196137
248	0.00205368
249	0.00206832
250	0.00192007
251	0.00178041
252	0.00154437
253	0.00139284
254	0.00139961
255	0.00140774
256	0.00149966
257	0.00169231
258	0.00200241
259	0.00211576
260	0.0022829
261	0.00253827
262	0.00237827
263	0.00198961
264	0.0019222
265	0.00260054
266	0.003118
267	0.00325728
268	0.00313596
269	0.00304199
270	0.00304832
271	0.00318016
272	0.00321737
273	0.00295886
274	0.00273945
275	0.00268476
276	0.00260348
277	0.00258794
278	0.00260701
279	0.00262915
280	0.00294428
281	0.00336852
282	0.00353757
283	0.00359203
284	0.0033948
285	0.00300758
286	0.00307299
287	0.00321276
288	0.00332965
289	0.00334382
290	0.00343387
291	0.00344648
292	0.00339236
293	0.00316308
294	0.00279484
295	0.00244353
296	0.00209386
297	0.00194961
298	0.00184366
299	0.00164808
300	0.00172139
301	0.00172665
302	0.00170034
303	0.00214165
304	0.00280602
305	0.00277843
306	0.00238243
307	0.00264902
308	0.00317122
309	0.00321278
310	0.00314513
311	0.00309791
312	0.00304322
313	0.00291602
314	0.00268478
315	0.00275255
316	0.00281461
317	0.00280343
318	0.00277527
319	0.00271608
320	0.00263487
321	0.00255473
322	0.00244887
323	0.00223948
324	0.0019562
325	0.00167853
326	0.00143031
327	0.0013131
328	0.00130898
329	0.00135983
330	0.0013796
331	0.00137077
332	0.00135802
333	0.00133131
334	0.00131253
335	0.00131172
336	0.0013102
337	0.00136422
338	0.00147837
339	0.0016587
340	0.00189963
341	0.00218863
342	0.00247827
343	0.00274666
344	0.00296746
345	0.00316376
346	0.00325558
347	0.00324039
348	0.00321712
349	0.00323396
350	0.00319549
351	0.00314731
352	0.00317576
353	0.00326421
354	0.00333462
355	0.00337033
356	0.00337433
357	0.00334615
358	0.00328438
359	0.00324969
360	0.00323651
361	0.00324032
362	0.00326357
363	0.00326677
364	0.0032736
365	0.0032712
366	0.00322377
367	0.00316319
368	0.0030911
369	0.00301968
370	0.00286265
371	0.00264291
372	0.00265781
373	0.00258728
374	0.00260562
375	0.00256782
376	0.00253744
377	0.00259136
378	0.00251759
379	0.00227433
380	0.00208697
381	0.00194608
382	0.00190698
383	0.00194032
384	0.00203025
385	0.00227236
386	0.00242516
387	0.00209029
388	0.00201083
389	0.00215109
390	0.00253372
391	0.00216758
392	0.00202076
393	0.00229451
394	0.00232023
395	0.00239978
396	0.00231917
397	0.00250433
398	0.00245662
399	0.00232383
400	0.00237265
401	0.00214689
402	0.00203596
403	0.0021402
404	0.0024029
405	0.00250786
406	0.00265311
407	0.00279228
408	0.00288537
409	0.00302766
410	0.00290047
411	0.00277573
412	0.00269592
413	0.0027819
414	0.00300264
415	0.00321137
416	0.00329981
417	0.00316038
418	0.00322351
419	0.00337351
420	0.00343558
421	0.00342881
422	0.0034085
423	0.00336511
424	0.00335062
425	0.00321739
426	0.00313183
427	0.00289383
428	0.00272074
429	0.00282604
430	0.0029853
431	0.00304852
432	0.00305887
433	0.00308558
434	0.00313968
435	0.00320255
436	0.00325151
437	0.00318183
438	0.00308695
439	0.00321527
440	0.00354504
441	0.00366354
442	0.00347394
443	0.00347593
444	0.00354899
445	0.00337993
446	0.00294717
447	0.00288911
448	0.00324345
449	0.00345711
450	0.00351434
451	0.00345779
452	0.00345775
453	0.00327419
454	0.00317424
455	0.00317088
456	0.00318067
457	0.00317204
458	0.00305424
459	0.0029696
460	0.00287193
461	0.0028605
462	0.00279357
463	0.00275051
464	0.00277127
465	0.00276883
466	0.00287138
467	0.00304435
468	0.00312833
469	0.00313403
470	0.00317567
471	0.00310339
472	0.00295777
473	0.0028788
474	0.00287898
475	0.00287357
476	0.00288175
477	0.00285051
478	0.00286177
479	0.0029164
480	0.00304574
481	0.0031889
482	0.00328068
483	0.00329047
484	0.00319631
485	0.00309795
486	0.00312143
487	0.00313892
488	0.00312429
489	0.00308451
490	0.00304809
491	0.00297955
492	0.00289626
493	0.00285347
494	0.0028337
495	0.00281156
496	0.00275563
497	0.00268831
498	0.00259911
499	0.00256237
500	0.00257708
501	0.00255143
502	0.00260098
503	0.00262255
504	0.00261603
505	0.00258484
506	0.00256835
507	0.00264947
508	0.00266629
509	0.00264349
510	0.00260784
511	0.00258089
512	0.00258356
513	0.00257974
514	0.00256298
515	0.00252635
516	0.00247263
517	0.00241471
518	0.00235995
519	0.00232025
520	0.00229459
521	0.00227097
522	0.0022601
523	0.00225888
524	0.00224569
525	0.00224615
526	0.00224221
527	0.00226989
528	0.00228152
529	0.00232372
530	0.00233812
531	0.00234928
532	0.00233607
533	0.00232844
534	0.00234436
535	0.00234111
536	0.00232807
537	0.00229389
538	0.00225896
539	0.00221809
540	0.0021783
541	0.00214675
542	0.00211313
543	0.00208444
544	0.00207535
545	0.00206652
546	0.00202641
547	0.00195358
548	0.00188926
549	0.00184267
550	0.00184986
551	0.00185543
552	0.00187312
553	0.00193694
554	0.00202597
555	0.00207214
556	0.00209194
557	0.00209497
558	0.00208587
559	0.00207082
560	0.00206272
561	0.00209734
562	0.00211872
563	0.00214778
564	0.00217728
565	0.00218337
566	0.00217997
567	0.00217673
568	0.0021756
569	0.00217688
570	0.00216637
571	0.00217073
572	0.00215976
573	0.00212941
574	0.0020995
575	0.00206404
576	0.00203777
577	0.00204309
578	0.0020745
579	0.00212043
580	0.00216547
581	0.00217422
582	0.00217206
583	0.0021688
584	0.00216879
585	0.00216247
586	0.00214904
587	0.0021273
588	0.00210744
589	0.00208847
590	0.0020791
591	0.00206988
592	0.00211222
593	0.00204809
594	0.00199719
595	0.00201433
596	0.00201694
597	0.00201789
598	0.00201937
599	0.00199356
600	0.00198863
601	0.00198427
602	0.00197088
603	0.00195771
604	0.00193561
605	0.00191168
606	0.00189124
607	0.00187595
608	0.00186821
609	0.00185667
610	0.00184411
611	0.00182111
612	0.00178984
613	0.00177176
614	0.00175782
615	0.00172318
616	0.00169061
617	0.00166075
618	0.00163936
619	0.00161545
620	0.00158516
621	0.00154543
622	0.0014858
623	0.00141989
624	0.00135991
625	0.00131675
626	0.00130324
627	0.00129373
628	0.00130891
629	0.00129241
630	0.00123163
631	0.00119811
632	0.00110755
633	0.00110486
634	0.00113172
635	0.00112838
636	0.00114054
637	0.00117297
638	0.0011823
639	0.00112722
640	0.00104439
641	0.00101095
642	0.00100158
643	0.00101424
644	0.00103101
645	0.00101601
646	0.000969862
647	0.000956186
648	0.00102894
649	0.00118113
650	0.00131734
651	0.00138088
652	0.00146533
653	0.00153581
654	0.0015349
655	0.00148646
656	0.00142756
657	0.00146309
658	0.00163722
659	0.00171507
660	0.00172546
661	0.00173198
662	0.0017262
663	0.00167897
664	0.00161386
665	0.00163903
666	0.00170377
667	0.00182319
668	0.00189126
669	0.00191795
670	0.00192204
671	0.00194264
672	0.00197742
673	0.0020107
674	0.00205871
675	0.00208785
676	0.00208947
677	0.00210209
678	0.00212543
679	0.00218515
680	0.00225862
681	0.00234872
682	0.00239436
683	0.00240205
684	0.00237234
685	0.00234873
686	0.00232435
687	0.002303
688	0.00227094
689	0.00224984
690	0.00226461
691	0.00226011
692	0.00234159
693	0.00252864
694	0.0026756
695	0.00255235
696	0.00255677
697	0.00248663
698	0.00243801
699	0.00237924
700	0.00205743
701	0.00211939
702	0.0020553
703	0.00188055
704	0.00187306
705	0.00176565
706	0.00171232
707	0.00191909
708	0.00198831
709	0.00204832
710	0.00210508
711	0.00212909
712	0.00214547
713	0.00208889
714	0.00207021
715	0.00213591
716	0.00215221
717	0.00215697
718	0.00215061
719	0.00212494
720	0.00214752
721	0.0021811
722	0.00223805
723	0.00230463
724	0.00233679
725	0.00236366
726	0.0023531
727	0.00232229
728	0.00228277
729	0.00222838
730	0.00217883
731	0.0021475
732	0.00212228
733	0.00209885
734	0.00208728
735	0.00205659
736	0.00202569
737	0.00200286
738	0.0019758
739	0.00195433
740	0.00193526
741	0.00191374
742	0.00190514
743	0.00186354
744	0.00184271
745	0.00182837
746	0.00180433
747	0.00179241
748	0.00178793
749	0.00179006
750	0.00176314
751	0.00171697
752	0.00170765
753	0.00170314
754	0.00169044
755	0.00167192
756	0.00165184
757	0.00163466
758	0.00162231
759	0.00161437
760	0.0015985
761	0.00157822
762	0.00156298
763	0.00155629
764	0.00154555
765	0.00151573
766	0.00146553
767	0.00140476
768	0.00144524
769	0.00147364
770	0.00148643
771	0.00148871
772	0.00148593
773	0.00149999
774	0.00149133
775	0.00150482
776	0.00151267
777	0.0015235
778	0.00154878
779	0.00155356
780	0.00154776
781	0.0015391
782	0.00150331
783	0.00144724
784	0.00143896
785	0.00147242
786	0.00148588
787	0.00147029
788	0.00143058
789	0.00138789
790	0.00135306
791	0.00132908
792	0.00132444
793	0.0012896
794	0.00125689
795	0.00128652
796	0.00129738
797	0.00127441
798	0.00125438
799	0.00123219
800	0.00118592
801	0.00119532
802	0.00125931
803	0.00130026
804	0.00132778
805	0.00138586
806	0.00139455
807	0.00134426
808	0.00128842
809	0.00124098
810	0.00121717
811	0.00122206
812	0.00125685
813	0.00125888
814	0.00123402
815	0.00123981
816	0.00132886
817	0.00137628
818	0.00137239
819	0.00141317
820	0.00143237
821	0.00143412
822	0.00143213
823	0.00144265
824	0.0014592
825	0.00145678
826	0.00144689
827	0.00144168
828	0.00142697
829	0.00143058
830	0.00145056
831	0.00144791
832	0.00143496
833	0.00144366
834	0.00145935
835	0.00145832
836	0.00145408
837	0.00146031
838	0.00146355
839	0.00146738
840	0.00146861
841	0.0014646
842	0.00147546
843	0.0014578
844	0.00144173
845	0.00144468
846	0.00144231
847	0.00144853
848	0.00143487
849	0.00141953
850	0.00139155
851	0.00134914
852	0.00133154
853	0.00134806
854	0.0013409
855	0.00132482
856	0.00131003
857	0.00129725
858	0.00128047
859	0.00125944
860	0.00123894
861	0.00123757
862	0.00124647
863	0.00124093
864	0.00122605
865	0.00120693
866	0.00119932
867	0.00119393
868	0.00120104
869	0.00120863
870	0.0012162
871	0.0012182
872	0.00121082
873	0.00117157
874	0.00117953
875	0.00115535
876	0.00112685
877	0.00110492
878	0.00107554
879	0.00104026
880	0.00101351
881	0.000973649
882	0.00093812
883	0.00091971
884	0.000903861
885	0.000895597
886	0.000891736
887	0.000851812
888	0.000803285
889	0.000872862
890	0.000891951
891	0.000931497
892	0.000976066
893	0.000978141
894	0.000961261
895	0.000962702
896	0.00098718
897	0.000996467
898	0.000981696
899	0.00100092
900	0.000957375
901	0.000925428
902	0.000870789
903	0.000908599
904	0.00089552
905	0.000866022
906	0.000860591
907	0.000795724
908	0.000752573
909	0.000695521
910	0.000686444
911	0.000674655
912	0.000773004
913	0.000815128
914	0.000878454
915	0.000885208
916	0.000852483
917	0.00081271
918	0.000778992
919	0.00072529
920	0.000605367
921	0.000549894
922	0.00054915
923	0.000476138
924	0.000460332
925	0.00047684
926	0.000504191
927	0.00053329
928	0.00055973
929	0.000553806
930	0.000531665
931	0.000539986
932	0.000547353
933	0.000515088
934	0.000498248
935	0.000507464
936	0.000554104
937	0.000598539
938	0.000643812
939	0.000699883
940	0.000743296
941	0.000826318
942	0.000920486
943	0.00105573
944	0.00114111
945	0.00119442
946	0.00122003
947	0.00120116
948	0.00115564
949	0.00116831
950	0.00122113
951	0.00126037
952	0.00126472
953	0.00127601
954	0.00130266
955	0.00132214
956	0.00134276
957	0.00134508
958	0.00135078
959	0.0013591
960	0.00137715
961	0.00138666
962	0.0013846
963	0.00137918
964	0.00137476
965	0.0013632
966	0.00134017
967	0.00130699
968	0.00128494
969	0.00129407
970	0.00130214
971	0.0012856
972	0.00127301
973	0.00125326
974	0.001223
975	0.00120298
976	0.00118645
977	0.0011832
978	0.00116984
979	0.00114908
980	0.00113712
981	0.00113199
982	0.00111961
983	0.00109985
984	0.00108579
985	0.0010662
986	0.00106013
987	0.00107609
988	0.00106779
989	0.00104418
990	0.00103912
991	0.00105175
992	0.00104683
993	0.00103561
994	0.00102957
995	0.00102324
996	0.00101636
997	0.00101481
998	0.00101172
999	0.0010089
1000	0.00100806
1001	0.00100379
1002	0.00099209
1003	0.000981351
1004	0.000958691
1005	0.000933799
1006	0.000908345
1007	0.000881274
1008	0.000858965
1009	0.000848142
1010	0.000850075
1011	0.000843962
1012	0.000825208
1013	0.000802927
1014	0.000782022
1015	0.000764721
1016	0.000754938
1017	0.000745718
1018	0.000733426
1019	0.000712125
1020	0.000665462
1021	0.000614541
1022	0.000596863
1023	0.000590814
1024	0.000581674
1025	0.000569841
1026	0.000557317
1027	0.000543242
1028	0.000520391
1029	0.000504616
1030	0.000479836
1031	0.000444899
1032	0.000423722
1033	0.000408547
1034	0.000404605
1035	0.000426865
1036	0.000483858
1037	0.000564614
1038	0.000601166
1039	0.000652457
1040	0.000654687
1041	0.000594901
1042	0.000612893
1043	0.000688933
1044	0.000766067
1045	0.000798835
1046	0.000794708
1047	0.000750426
1048	0.000729426
1049	0.000752833
1050	0.000779714
1051	0.00079349
1052	0.0008415
1053	0.000865221
1054	0.000889996
1055	0.000909912
1056	0.000925315
1057	0.000961765
1058	0.000977118
1059	0.000946586
1060	0.000911867
1061	0.000910393
1062	0.000938094
1063	0.000970917
1064	0.00097399
1065	0.000957241
1066	0.00093874
1067	0.00092094
1068	0.000906922
1069	0.000896649
1070	0.000880698
1071	0.000856058
1072	0.000846132
1073	0.000851967
1074	0.000865685
1075	0.000866387
1076	0.000858149
1077	0.00084705
1078	0.000835319
1079	0.000813898
1080	0.000800435
1081	0.000807755
1082	0.000821127
1083	0.000829003
1084	0.000830575
1085	0.000814267
1086	0.000791121
1087	0.000731439
1088	0.000706073
1089	0.000726105
1090	0.00072784
1091	0.00072582
1092	0.000712963
1093	0.000715196
1094	0.000698708
1095	0.000670813
1096	0.000660281
1097	0.000647616
1098	0.000632555
1099	0.000605013
1100	0.000600533
1101	0.000652529
1102	0.00067901
1103	0.000696583
1104	0.000706088
1105	0.000701042
1106	0.000682039
1107	0.000661764
1108	0.00068136
1109	0.000729764
1110	0.000750854
1111	0.000767688
1112	0.000798322
1113	0.000810718
1114	0.000797658
1115	0.000802869
1116	0.00080081
1117	0.000799843
1118	0.000796503
1119	0.000780783
1120	0.000774763
1121	0.000789402
1122	0.000814707
1123	0.000798039
1124	0.000748244
1125	0.000716572
1126	0.000708954
1127	0.00074195
1128	0.000794792
1129	0.000822905
1130	0.000831538
1131	0.000811173
1132	0.000811136
1133	0.00081383
1134	0.0008159
1135	0.000817925
1136	0.000814781
1137	0.000811564
1138	0.000802983
1139	0.000804492
1140	0.000837296
1141	0.000815177
1142	0.000761974
1143	0.000745952
1144	0.000808591
1145	0.000881862
1146	0.000912557
1147	0.000902027
1148	0.000888676
1149	0.000879062
1150	0.00085326
1151	0.000836917
1152	0.000837765
1153	0.000837755
1154	0.000838088
1155	0.000839479
1156	0.000842586
1157	0.000833086
1158	0.000806249
1159	0.000787883
1160	0.000758461
1161	0.000731511
1162	0.000709306
1163	0.000702161
1164	0.000695444
1165	0.0006865
1166	0.000663116
1167	0.000623446
1168	0.000590914
1169	0.000577796
1170	0.000562137
1171	0.000530731
1172	0.000518224
1173	0.000510656
1174	0.000495088
1175	0.000506649
1176	0.000520662
1177	0.000521253
1178	0.000518296
1179	0.000515073
1180	0.000520732
1181	0.000542029
1182	0.000562073
1183	0.000542811
1184	0.000551716
1185	0.00058053
1186	0.000605773
1187	0.000611636
1188	0.000606309
1189	0.000590324
1190	0.000569237
1191	0.000570117
1192	0.000578873
1193	0.000589217
1194	0.000603019
1195	0.000621673
1196	0.000643791
1197	0.000665355
1198	0.000680093
1199	0.000691256
1200	0.000705476
1201	0.000720301
1202	0.000738226
1203	0.000762315
1204	0.000752401
1205	0.000743911
1206	0.000739115
1207	0.000721323
1208	0.000723967
1209	0.000730836
1210	0.000744694
1211	0.000749524
1212	0.000746328
1213	0.000762643
1214	0.000790514
1215	0.000788503
1216	0.00077378
1217	0.000745267
1218	0.000732093
1219	0.000774438
1220	0.000784634
1221	0.000753503
1222	0.000729157
1223	0.000710807
1224	0.000681861
1225	0.000690214
1226	0.000722311
1227	0.000728632
1228	0.000713494
1229	0.0006893
1230	0.000669283
1231	0.000647145
1232	0.000625218
1233	0.000619642
1234	0.000649614
1235	0.000669785
1236	0.000649185
1237	0.000626559
1238	0.000608428
1239	0.00060176
1240	0.000580757
1241	0.000589925
1242	0.000584679
1243	0.000566189
1244	0.000555341
1245	0.000561237
1246	0.000559959
1247	0.000556871
1248	0.000562415
1249	0.000589144
1250	0.000612421
1251	0.000584123
1252	0.000558219
1253	0.000533424
1254	0.000521478
1255	0.00052874
1256	0.000532682
1257	0.000542891
1258	0.00055363
1259	0.0005616
1260	0.000547462
1261	0.000538854
1262	0.000531149
1263	0.000521596
1264	0.000515994
1265	0.000514373
1266	0.0005132
1267	0.000515165
1268	0.000527991
1269	0.000539246
1270	0.000547133
1271	0.000549492
1272	0.000540562
1273	0.000527257
1274	0.000518312
1275	0.000527387
1276	0.000522679
1277	0.000509255
1278	0.000499025
1279	0.000498622
1280	0.00051671
1281	0.000541684
1282	0.000577781
1283	0.000618837
1284	0.000653965
1285	0.000656491
1286	0.000636528
1287	0.000609012
1288	0.000607285
1289	0.000596751
1290	0.000578894
1291	0.000580882
1292	0.000587518
1293	0.00061868
1294	0.000624842
1295	0.000583288
1296	0.000554155
1297	0.00055482
1298	0.000582309
1299	0.00062224
1300	0.000620437
1301	0.000668856
1302	0.000729018
1303	0.000777222
1304	0.00080121
1305	0.000826001
1306	0.000843319
1307	0.000850502
1308	0.000854555
1309	0.00085483
1310	0.0008642
1311	0.000875949
1312	0.000878024
1313	0.000874929
1314	0.000862395
1315	0.000851711
1316	0.000850176
1317	0.000861815
1318	0.000869892
1319	0.000870413
1320	0.000863719
1321	0.000860171
1322	0.000856919
1323	0.000854882
1324	0.000853502
1325	0.000850417
1326	0.000856461
1327	0.000866159
1328	0.000867463
1329	0.000861477
1330	0.000846434
1331	0.000834217
1332	0.000833778
1333	0.000831762
1334	0.000830238
1335	0.000827009
1336	0.000829925
1337	0.000836966
1338	0.000842288
1339	0.000844068
1340	0.000842503
1341	0.000837764
1342	0.000818073
1343	0.000793
1344	0.000781727
1345	0.000773299
1346	0.000765696
1347	0.000756783
1348	0.000741871
1349	0.000738271
1350	0.000736591
1351	0.000745205
1352	0.00075027
1353	0.000745251
1354	0.000740596
1355	0.000711594
1356	0.000693435
1357	0.000679237
1358	0.000677961
1359	0.000683145
1360	0.000689726
1361	0.000694563
1362	0.000699773
1363	0.000700251
1364	0.000699817
1365	0.000699882
1366	0.000706568
1367	0.000698846
1368	0.000692133
1369	0.000681469
1370	0.000661012
1371	0.000651766
1372	0.000655962
1373	0.000663642
1374	0.000663847
1375	0.000652185
1376	0.000634975
1377	0.000613677
1378	0.000601493
1379	0.000601155
1380	0.000599045
1381	0.000606746
1382	0.000606307
1383	0.000609043
1384	0.000583167
1385	0.00056819
1386	0.000559922
1387	0.000570264
1388	0.000564839
1389	0.00056315
1390	0.000579166
1391	0.000602374
1392	0.000595549
1393	0.000606921
1394	0.000625426
1395	0.000649954
1396	0.000661787
1397	0.000671929
1398	0.000671688
1399	0.000673169
1400	0.000682645
1401	0.00072369
1402	0.000735118
1403	0.000738568
1404	0.00073679
1405	0.00072993
1406	0.000712892
1407	0.0007114
1408	0.000709089
1409	0.000712019
1410	0.00071015
1411	0.000713864
1412	0.000715323
1413	0.000709848
1414	0.00070168
1415	0.00070303
1416	0.000719315
1417	0.000710552
1418	0.000726294
1419	0.000734721
1420	0.000739986
1421	0.000731601
1422	0.000720249
1423	0.000708172
1424	0.000702838
1425	0.000699589
1426	0.00069596
1427	0.00068977
1428	0.000685719
1429	0.000683859
1430	0.000685808
1431	0.000691008
1432	0.000689986
1433	0.000682584
1434	0.000674482
1435	0.000669592
1436	0.000664306
1437	0.000658204
1438	0.000651557
1439	0.00064657
1440	0.000650844
1441	0.000663956
1442	0.000675498
1443	0.000678664
1444	0.000678523
1445	0.000673768
1446	0.00066999
1447	0.00066594
1448	0.000656779
1449	0.000646671
1450	0.000641951
1451	0.000641153
1452	0.000632191
1453	0.000623272
1454	0.00061831
1455	0.000610617
1456	0.000617607
1457	0.000636231
1458	0.000648132
1459	0.00065979
1460	0.000659993
1461	0.000656327
1462	0.00065874
1463	0.000662794
1464	0.000656947
1465	0.000656551
1466	0.000664023
1467	0.000676534
1468	0.000685047
1469	0.000689915
1470	0.000691885
1471	0.000698762
1472	0.00070055
1473	0.000700703
1474	0.000697742
1475	0.000688909
1476	0.000678899
1477	0.000672968
1478	0.000675213
1479	0.000683521
1480	0.00070012
1481	0.000711919
1482	0.000717778
1483	0.000723116
1484	0.000729379
1485	0.000734041
1486	0.000733626
1487	0.000732552
1488	0.00073491
1489	0.000736628
1490	0.000720869
1491	0.000705597
1492	0.00071036
1493	0.000719604
1494	0.00072367
1495	0.000724427
1496	0.00071987
1497	0.000711705
1498	0.000697755
1499	0.000680846
1500	0.000665004
1501	0.000655919
1502	0.000654244
1503	0.000650163
1504	0.000649699
1505	0.000650511
1506	0.000649193
1507	0.000646685
1508	0.000642795
1509	0.000640921
1510	0.000639125
1511	0.00064466
1512	0.000653933
1513	0.000661212
1514	0.000662782
1515	0.000658908
1516	0.000653234
1517	0.000646329
1518	0.000642486
1519	0.000643118
1520	0.00064324
1521	0.000642341
1522	0.000638141
1523	0.000629714
1524	0.000621573
1525	0.000610197
1526	0.000599582
1527	0.000591779
1528	0.000588142
1529	0.000576118
1530	0.000569731
1531	0.000574444
1532	0.000582604
1533	0.000590693
1534	0.000593829
1535	0.00059026
1536	0.000588158
1537	0.000588738
1538	0.000586939
1539	0.000572901
1540	0.000557401
1541	0.000543051
1542	0.000534703
1543	0.000533386
1544	0.000532838
1545	0.000533125
1546	0.000531959
1547	0.000530225
1548	0.000528373
1549	0.000524319
1550	0.000519404
1551	0.000516839
1552	0.000517667
1553	0.000518682
1554	0.000520491
1555	0.000523611
1556	0.000523757
1557	0.000522047
1558	0.000520279
1559	0.000519126
1560	0.000518991
1561	0.000520994
1562	0.000522465
1563	0.000522582
1564	0.000526726
1565	0.000533685
1566	0.000526992
1567	0.000529433
1568	0.000531303
1569	0.000540139
1570	0.000534252
1571	0.000523246
1572	0.000509733
1573	0.000498328
1574	0.000504873
1575	0.000517536
1576	0.000497013
1577	0.000478245
1578	0.000464598
1579	0.000472468
1580	0.00050874
1581	0.000610013
1582	0.000652808
1583	0.000606073
1584	0.000545279
1585	0.000547705
1586	0.000579754
1587	0.000636494
1588	0.000649817
1589	0.000633306
1590	0.00062799
1591	0.000618545
1592	0.000614101
1593	0.000602523
1594	0.000578162
1595	0.000570525
1596	0.000546071
1597	0.000546332
1598	0.000583102
1599	0.000666539
1600	0.000718578
1601	0.00072872
1602	0.000730902
1603	0.000728604
1604	0.000717244
1605	0.000718732
1606	0.000724922
1607	0.000730811
1608	0.000729779
1609	0.000729061
1610	0.000729512
1611	0.000716222
1612	0.000696807
1613	0.000676718
1614	0.000676443
1615	0.000679381
1616	0.000683876
1617	0.000680068
1618	0.000672712
1619	0.000659145
1620	0.000631399
1621	0.000604779
1622	0.000590076
1623	0.000584556
1624	0.000576039
1625	0.000572199
1626	0.000585717
1627	0.000601845
1628	0.000602214
1629	0.000597195
1630	0.000608801
1631	0.00061787
1632	0.000576455
1633	0.00057743
1634	0.000605289
1635	0.000640895
1636	0.000652636
1637	0.000661517
1638	0.000675013
1639	0.000689839
1640	0.000699597
1641	0.000713164
1642	0.000712547
1643	0.000705261
1644	0.000699472
1645	0.000693496
1646	0.000690468
1647	0.000693391
1648	0.000695663
1649	0.000686195
1650	0.000678308
1651	0.000689435
1652	0.000695076
1653	0.000695564
1654	0.000693211
1655	0.000696656
1656	0.000700762
1657	0.000713313
1658	0.000720113
1659	0.000721404
1660	0.000714999
1661	0.000718764
1662	0.000732293
1663	0.000737969
1664	0.000733624
1665	0.000735349
1666	0.000724453
1667	0.000712135
1668	0.000714322
1669	0.000726198
1670	0.000751524
1671	0.000762816
1672	0.000770353
1673	0.000774733
1674	0.000775778
1675	0.00077428
1676	0.000774424
1677	0.000772973
1678	0.000769259
1679	0.000767634
1680	0.000768398
1681	0.000762844
1682	0.000755372
1683	0.00074363
1684	0.000732946
1685	0.000732279
1686	0.000735662
1687	0.000726911
1688	0.000697344
1689	0.000673954
1690	0.000668454
1691	0.000681097
1692	0.000694835
1693	0.000692173
1694	0.000684562
1695	0.000677086
1696	0.000665708
1697	0.000654523
1698	0.000646699
1699	0.000641599
1700	0.000629832
1701	0.000601229
1702	0.000560151
1703	0.00053343
1704	0.000530765
1705	0.000539114
1706	0.000545175
1707	0.000552035
1708	0.000551473
1709	0.000547217
1710	0.000547686
1711	0.000546268
1712	0.00054471
1713	0.000545917
1714	0.000547575
1715	0.000547688
1716	0.000546859
1717	0.000543492
1718	0.000541313
1719	0.000542497
1720	0.000541508
1721	0.000543628
1722	0.000548373
1723	0.000547333
1724	0.000551032
1725	0.000564997
1726	0.000578493
1727	0.000581179
1728	0.000583678
1729	0.000588435
1730	0.000591593
1731	0.00059284
1732	0.000592105
1733	0.000590846
1734	0.000590029
1735	0.000589265
1736	0.000588893
1737	0.000587099
1738	0.000589464
1739	0.000602581
1740	0.000614823
1741	0.000622048
1742	0.000631669
1743	0.000643964
1744	0.000652369
1745	0.000652477
1746	0.000649753
1747	0.000644343
1748	0.000640229
1749	0.000644009
1750	0.000649596
1751	0.000650698
1752	0.000649106
1753	0.000645705
1754	0.000643632
1755	0.000646373
1756	0.000649827
1757	0.000650938
1758	0.000650801
1759	0.000652377
1760	0.000652611
1761	0.000651339
1762	0.000644494
1763	0.000638627
1764	0.000639487
1765	0.000646177
1766	0.000655245
1767	0.000662237
1768	0.000666781
1769	0.000672028
1770	0.000677024
1771	0.000677052
1772	0.000675678
1773	0.000675563
1774	0.000675673
1775	0.000676134
1776	0.000677651
1777	0.000679994
1778	0.000680479
1779	0.000663696
1780	0.000649685
1781	0.000643452
1782	0.000644938
1783	0.000654117
1784	0.000663651
1785	0.000671578
1786	0.000675157
1787	0.000673682
1788	0.000676129
1789	0.000678889
1790	0.000679223
1791	0.000678669
1792	0.00067786
1793	0.000676844
1794	0.000676229
1795	0.000677104
1796	0.00067279
1797	0.000664729
1798	0.00066233
1799	0.000663522
1800	0.000661588
1801	0.000660638
1802	0.00066368
1803	0.000657928
1804	0.000650269
1805	0.000640915
1806	0.000640064
1807	0.000658128
1808	0.000671738
1809	0.00066321
1810	0.000642271
1811	0.000643189
1812	0.00064987
1813	0.000670871
1814	0.000678919
1815	0.000680375
1816	0.000677414
1817	0.00067543
1818	0.000674416
1819	0.000669451
1820	0.000649039
1821	0.000640238
1822	0.000642297
1823	0.000648038
1824	0.000654461
1825	0.000657878
1826	0.000655328
1827	0.00066026
1828	0.000663841
1829	0.000659267
1830	0.000656128
1831	0.000654832
1832	0.000652053
1833	0.000650792
1834	0.000632039
1835	0.000628911
1836	0.000634439
1837	0.000637379
1838	0.000637593
1839	0.000627768
1840	0.000610443
1841	0.000598294
1842	0.000598061
1843	0.000595913
1844	0.000575576
1845	0.000543989
1846	0.000537141
1847	0.000560549
1848	0.000586166
1849	0.000593993
1850	0.000595187
1851	0.000590546
1852	0.000573413
1853	0.000540927
1854	0.000520164
1855	0.000532028
1856	0.000567089
1857	0.000602722
1858	0.000624878
1859	0.000636163
1860	0.000640153
1861	0.00063503
1862	0.000621373
1863	0.000604714
1864	0.000594093
1865	0.000602254
1866	0.000616426
1867	0.000613037
1868	0.000581547
1869	0.00056455
1870	0.000558797
1871	0.000553991
1872	0.000560682
1873	0.000577612
1874	0.00059403
1875	0.0006139
1876	0.000618837
1877	0.000615791
1878	0.000613364
1879	0.000606573
1880	0.000600837
1881	0.000592618
1882	0.000574372
1883	0.000554122
1884	0.000542655
1885	0.000556053
1886	0.000575008
1887	0.000593821
1888	0.000612176
1889	0.000616161
1890	0.000615502
1891	0.000614927
1892	0.00060881
1893	0.000609382
1894	0.000624067
1895	0.000630331
1896	0.000628157
1897	0.000622017
1898	0.000602617
1899	0.000576378
1900	0.000552617
1901	0.000536802
1902	0.000533366
1903	0.000541725
1904	0.000546175
1905	0.000544777
1906	0.000551234
1907	0.000568528
1908	0.000588281
1909	0.000585564
1910	0.000589202
1911	0.000597388
1912	0.000595672
1913	0.00058742
1914	0.00058252
1915	0.00057305
1916	0.000561672
1917	0.000563278
1918	0.000570271
1919	0.000577598
1920	0.000579449
1921	0.000578322
1922	0.000573187
1923	0.000562093
1924	0.000555834
1925	0.00056701
1926	0.000573195
1927	0.00057028
1928	0.000562533
1929	0.00056159
1930	0.000561918
1931	0.000560417
1932	0.000557653
1933	0.00056001
1934	0.000570661
1935	0.000574363
1936	0.000564214
1937	0.000548547
1938	0.000530997
1939	0.000527303
1940	0.000551581
1941	0.000565386
1942	0.000562404
1943	0.000559716
1944	0.000560321
1945	0.000559159
1946	0.000554961
1947	0.000546877
1948	0.000532852
1949	0.000525095
1950	0.000529068
1951	0.000537837
1952	0.000557553
1953	0.000569393
1954	0.000570548
1955	0.000565012
1956	0.000550323
1957	0.000533881
1958	0.000528048
1959	0.00053054
1960	0.000537938
1961	0.000552917
1962	0.000558553
1963	0.000550829
1964	0.000541213
1965	0.000532629
1966	0.000519708
1967	0.000505751
1968	0.000500526
1969	0.000496459
1970	0.000510364
1971	0.000516709
1972	0.00052361
1973	0.000523493
1974	0.000520915
1975	0.000521506
1976	0.000523674
1977	0.000522781
1978	0.000514602
1979	0.00049973
1980	0.000482393
1981	0.000475004
1982	0.000475786
1983	0.000478221
1984	0.000488698
1985	0.000505112
1986	0.000516268
1987	0.000520634
1988	0.000528138
1989	0.000535424
1990	0.000540871
1991	0.000546912
1992	0.000553988
1993	0.00055542
1994	0.000553188
1995	0.000550844
1996	0.000549585
1997	0.000546752
1998	0.000546775
[truncated: 15,521 more rows]

## Sheet: 297m
hours	concentration
0	0
1	0
2	0
3	0
4	1.0057e-28
5	2.44769e-28
6	3.69071e-28
7	4.5941e-25
8	2.45903e-17
9	5.11784e-15
10	2.02631e-12
11	3.43631e-12
12	2.31307e-12
13	1.94382e-12
14	1.60264e-12
15	1.14339e-12
16	1.06848e-12
17	3.55878e-12
18	6.21866e-12
19	7.18168e-12
20	7.78019e-12
21	8.29633e-12
22	8.78384e-12
23	9.31004e-12
24	1.04043e-11
25	1.91215e-08
26	1.08547e-07
27	1.19184e-07
28	1.09473e-12
29	1.23762e-12
30	1.2045e-12
31	8.42077e-13
32	2.06363e-11
33	2.16766e-09
34	1.02802e-07
35	4.19993e-07
36	8.70694e-07
37	1.60004e-06
38	2.9672e-06
39	4.12388e-06
40	4.02062e-06
41	3.75445e-06
42	3.89298e-06
43	3.59993e-06
44	1.31661e-05
45	5.42252e-05
46	6.07485e-05
47	5.30025e-05
48	1.64765e-05
49	2.44554e-05
50	0.000266038
51	0.000601208
52	0.000562311
53	0.000286795
54	0.000249759
55	0.000293948
56	0.00035698
57	0.000405823
58	0.00040514
59	0.000403863
60	0.000396793
61	0.000352779
62	0.000322241
63	0.000230756
64	9.11798e-05
65	6.83206e-05
66	7.00976e-05
67	7.25335e-05
68	8.04044e-05
69	8.1332e-05
70	8.78244e-05
71	0.000112353
72	0.000155849
73	0.000172516
74	0.000174266
75	0.000171122
76	0.000166114
77	0.000158121
78	0.000144913
79	0.000128646
80	0.000120981
81	0.000120362
82	0.00011853
83	0.000111161
84	0.000104939
85	9.83405e-05
86	9.47201e-05
87	9.14979e-05
88	8.81469e-05
89	8.45852e-05
90	8.42424e-05
91	8.43924e-05
92	8.34556e-05
93	8.31702e-05
94	8.11465e-05
95	7.82798e-05
96	8.84777e-05
97	0.000109101
98	0.000122172
99	0.000130616
100	0.000130826
101	0.000126934
102	0.000123239
103	0.000120921
104	0.000119803
105	0.000120274
106	0.000122401
107	0.000125144
108	0.000129184
109	0.000134983
110	0.000142122
111	0.000147224
112	0.000146906
113	0.000139248
114	0.000129245
115	0.000125893
116	0.000126148
117	0.000131825
118	0.000138924
119	0.000137592
120	0.000134128
121	0.000129765
122	0.000134416
123	0.00018332
124	0.000204219
125	0.00022107
126	0.000267951
127	0.000288154
128	0.000226339
129	0.00030056
130	0.000537571
131	0.000831556
132	0.00118174
133	0.00140502
134	0.0013953
135	0.0012741
136	0.00118396
137	0.00125566
138	0.00156036
139	0.00154624
140	0.00146457
141	0.0011977
142	0.000983331
143	0.00106991
144	0.00138833
145	0.00177693
146	0.00219177
147	0.00257857
148	0.00260182
149	0.00242964
150	0.00239541
151	0.00222208
152	0.00189436
153	0.00154017
154	0.00123238
155	0.000991776
156	0.000978185
157	0.00112755
158	0.00137524
159	0.00160226
160	0.00164649
161	0.00155376
162	0.00138053
163	0.00120058
164	0.0010327
165	0.000948693
166	0.000963531
167	0.00101719
168	0.0010507
169	0.0010166
170	0.000928334
171	0.000835409
172	0.000724986
173	0.000639608
174	0.000657457
175	0.000842878
176	0.00112071
177	0.00141848
178	0.00170533
179	0.00193188
180	0.00205216
181	0.00200803
182	0.00178264
183	0.0015227
184	0.00138938
185	0.00136681
186	0.00144251
187	0.00151654
188	0.00152656
189	0.00150608
190	0.00151022
191	0.00146728
192	0.00136722
193	0.001351
194	0.00141289
195	0.0014964
196	0.00160517
197	0.00162399
198	0.00144261
199	0.00126914
200	0.0011776
201	0.00119295
202	0.00126943
203	0.00138094
204	0.00154377
205	0.00161006
206	0.00143805
207	0.00128125
208	0.00126565
209	0.00122506
210	0.00120183
211	0.00118376
212	0.00124533
213	0.00133309
214	0.0014037
215	0.00132879
216	0.0012231
217	0.00121523
218	0.00167358
219	0.00162644
220	0.00130284
221	0.00139895
222	0.00152421
223	0.00137667
224	0.00125929
225	0.00117426
226	0.00107582
227	0.000862534
228	0.000726211
229	0.000685192
230	0.000713439
231	0.000714078
232	0.000781322
233	0.000795184
234	0.00105542
235	0.00147066
236	0.00159663
237	0.00154292
238	0.00154345
239	0.0015109
240	0.00145968
241	0.00139177
242	0.001378
243	0.00143097
244	0.00146557
245	0.00147199
246	0.00147791
247	0.00148681
248	0.00144781
249	0.00140358
250	0.00133689
251	0.00120955
252	0.000996495
253	0.000839379
254	0.000744014
255	0.000700334
256	0.000693015
257	0.000730827
258	0.000695724
259	0.000692584
260	0.000683112
261	0.000652176
262	0.000712419
263	0.000770133
264	0.00100939
265	0.00100586
266	0.00125388
267	0.001629
268	0.0018359
269	0.00201224
270	0.00238454
271	0.00261508
272	0.00317737
273	0.003095
274	0.00349354
275	0.00363945
276	0.00396613
277	0.0041722
278	0.00462573
279	0.00501299
280	0.00535599
281	0.00570626
282	0.00529717
283	0.00485045
284	0.00431798
285	0.00378728
286	0.0038268
287	0.00385546
288	0.00360721
289	0.00337078
290	0.0030802
291	0.00308027
292	0.0031426
293	0.00327598
294	0.00351261
295	0.00378594
296	0.00369055
297	0.00359411
298	0.00351973
299	0.00356239
300	0.00391429
301	0.0042631
302	0.00451069
303	0.00474544
304	0.0048986
305	0.0048166
306	0.00470085
307	0.00480978
308	0.00508924
309	0.0050402
310	0.0052065
311	0.00535127
312	0.0055607
313	0.00606064
314	0.00653985
315	0.00671458
316	0.00697551
317	0.00722207
318	0.00744355
319	0.00731967
320	0.00697589
321	0.00687229
322	0.00682044
323	0.0065401
324	0.00623434
325	0.00591801
326	0.00569968
327	0.0055367
328	0.00528625
329	0.00503452
330	0.00492847
331	0.00484025
332	0.00474188
333	0.00464019
334	0.00448911
335	0.00432576
336	0.00419745
337	0.00396859
338	0.00376442
339	0.00378073
340	0.00390081
341	0.00407116
342	0.00414447
343	0.00409885
344	0.00403385
345	0.00398679
346	0.00385306
347	0.00364671
348	0.00370488
349	0.0038591
350	0.00383621
351	0.0037048
352	0.00367656
353	0.00369868
354	0.00393207
355	0.00424229
356	0.00454774
357	0.0044543
358	0.00421906
359	0.00422847
360	0.00431196
361	0.00436386
362	0.00441557
363	0.00441137
364	0.00449133
365	0.00470512
366	0.00488217
367	0.00511944
368	0.00512255
369	0.00500763
370	0.0051389
371	0.00507792
372	0.00477313
373	0.00469457
374	0.00480626
375	0.00467199
376	0.00468163
377	0.00466136
378	0.00463826
379	0.00440105
380	0.00425717
381	0.0043625
382	0.00422154
383	0.00400191
384	0.00415498
385	0.00399056
386	0.00376273
387	0.00376813
388	0.00373164
389	0.00361126
390	0.00350896
391	0.00358625
392	0.00357919
393	0.00350035
394	0.0033654
395	0.00333328
396	0.00328585
397	0.00332427
398	0.00338625
399	0.00348636
400	0.00342338
401	0.00323442
402	0.00306383
403	0.00303315
404	0.0029754
405	0.00292747
406	0.00301656
407	0.00298459
408	0.00301502
409	0.00287803
410	0.00270756
411	0.0025278
412	0.002417
413	0.00239245
414	0.00243186
415	0.00249041
416	0.00243618
417	0.00241443
418	0.00255511
419	0.00265076
420	0.00270576
421	0.00265264
422	0.00258465
423	0.00243165
424	0.00231604
425	0.00226902
426	0.00220773
427	0.00209226
428	0.00198832
429	0.00200243
430	0.00214452
431	0.00224618
432	0.00232533
433	0.00229291
434	0.00225567
435	0.00223552
436	0.0022783
437	0.00219896
438	0.00217127
439	0.00221013
440	0.00220915
441	0.00228693
442	0.00234225
443	0.00237706
444	0.00236092
445	0.00221243
446	0.00201043
447	0.00193657
448	0.00204015
449	0.00204743
450	0.0019672
451	0.00192751
452	0.00199252
453	0.00224697
454	0.00234408
455	0.00234695
456	0.00227056
457	0.00214238
458	0.0019538
459	0.00190363
460	0.00189117
461	0.0018001
462	0.00170011
463	0.00172092
464	0.00174387
465	0.00161302
466	0.00163377
467	0.00157987
468	0.0016362
469	0.0017306
470	0.00175808
471	0.00169648
472	0.00166181
473	0.00159726
474	0.00155873
475	0.00163676
476	0.00168422
477	0.00164341
478	0.00159934
479	0.00160863
480	0.0015305
481	0.00161008
482	0.00169852
483	0.00178471
484	0.00189943
485	0.00227934
486	0.00246415
487	0.00261209
488	0.00262994
489	0.00258458
490	0.00250319
491	0.00232783
492	0.00208138
493	0.00198164
494	0.00189788
495	0.00177094
496	0.00171471
497	0.00155394
498	0.00143758
499	0.00131834
500	0.00125037
501	0.00118188
502	0.00120154
503	0.0012442
504	0.00139561
505	0.00152585
506	0.00179394
507	0.00216899
508	0.00234728
509	0.00243453
510	0.00239309
511	0.00236353
512	0.00225236
513	0.00219457
514	0.00226013
515	0.00227525
516	0.00221589
517	0.00213618
518	0.00209729
519	0.00207682
520	0.00207769
521	0.00214602
522	0.00224849
523	0.00221975
524	0.0020652
525	0.00177125
526	0.00168602
527	0.00176134
528	0.00191961
529	0.00190423
530	0.00199898
531	0.00210617
532	0.00200328
533	0.00201745
534	0.00210461
535	0.00229536
536	0.00241882
537	0.00244186
538	0.0023284
539	0.00227202
540	0.00216157
541	0.00211186
542	0.00213952
543	0.00208393
544	0.00197756
545	0.00191502
546	0.00190097
547	0.00186756
548	0.00181322
549	0.00173927
550	0.0016274
551	0.00155141
552	0.00147441
553	0.00142551
554	0.00133467
555	0.00131313
556	0.00124864
557	0.00118264
558	0.00119354
559	0.00116057
560	0.00116685
561	0.00123132
562	0.00121535
563	0.00122604
564	0.00132328
565	0.0013382
566	0.00125604
567	0.00116242
568	0.00120521
569	0.00123746
570	0.00121732
571	0.00120023
572	0.0011631
573	0.00113122
574	0.00113335
575	0.00117049
576	0.00118611
577	0.0011926
578	0.00122305
579	0.00127948
580	0.00139546
581	0.00150315
582	0.00161554
583	0.00184165
584	0.00210786
585	0.00232087
586	0.00247266
587	0.00259641
588	0.00265789
589	0.00267928
590	0.00268014
591	0.00266177
592	0.00264118
593	0.00263109
594	0.00260377
595	0.00257391
596	0.00255938
597	0.00255374
598	0.00255597
599	0.00257955
600	0.00264624
601	0.00280015
602	0.0029501
603	0.0031117
604	0.00322864
605	0.00332426
606	0.00339022
607	0.00341235
608	0.00342084
609	0.00341459
610	0.00341701
611	0.00342344
612	0.00339327
613	0.00336724
614	0.00336422
615	0.0033804
616	0.0033165
617	0.00323279
618	0.0031853
619	0.00319125
620	0.00318299
621	0.00310935
622	0.00306939
623	0.00304527
624	0.00302489
625	0.00296013
626	0.00293171
627	0.00290894
628	0.00284797
629	0.00274961
630	0.0026524
631	0.00256527
632	0.00243063
633	0.00229319
634	0.00215386
635	0.00206099
636	0.00202033
637	0.00199718
638	0.00197919
639	0.00191453
640	0.00185263
641	0.0017943
642	0.00171109
643	0.00167544
644	0.00161826
645	0.00158995
646	0.00154926
647	0.00155515
648	0.00154245
649	0.00148147
650	0.00140081
651	0.00132107
652	0.00125761
653	0.00119918
654	0.0011545
655	0.00112591
656	0.00108703
657	0.0011081
658	0.00110015
659	0.00109614
660	0.00108107
661	0.00108644
662	0.00106579
663	0.00104436
664	0.00102784
665	0.00102983
666	0.00103313
667	0.00107647
668	0.00111554
669	0.00111068
670	0.00110835
671	0.00108562
672	0.00106813
673	0.00103292
674	0.00101507
675	0.00101435
676	0.00101688
677	0.00103088
678	0.00105839
679	0.00106206
680	0.00104891
681	0.00103033
682	0.000988358
683	0.000944109
684	0.000915239
685	0.000895693
686	0.000888894
687	0.000903943
688	0.000950312
689	0.000972845
690	0.00095866
691	0.000931464
692	0.000888321
693	0.000864279
694	0.000864083
695	0.000861374
696	0.000859957
697	0.000837543
698	0.00078272
699	0.000761688
700	0.000744557
701	0.000729859
702	0.000734607
703	0.000758889
704	0.000758169
705	0.000749433
706	0.000767402
707	0.000852401
708	0.000882508
709	0.000912756
710	0.000961974
711	0.000977555
712	0.000990803
713	0.00110023
714	0.00127584
715	0.00127458
716	0.00129682
717	0.00125606
718	0.00130663
719	0.00128723
720	0.0013915
721	0.00138911
722	0.00136498
723	0.00130184
724	0.00133142
725	0.00132475
726	0.00124209
727	0.00117749
728	0.00113464
729	0.00106272
730	0.00108549
731	0.00113621
732	0.00116095
733	0.00116833
734	0.00123163
735	0.00125433
736	0.00128094
737	0.00132525
738	0.00133167
739	0.0013146
740	0.00132052
741	0.00131666
742	0.00131591
743	0.00134607
744	0.00135846
745	0.00138129
746	0.00141719
747	0.00142419
748	0.00144852
749	0.00147465
750	0.00149589
751	0.00151861
752	0.00151572
753	0.00149818
754	0.00145808
755	0.00140658
756	0.00139171
757	0.00141165
758	0.00142159
759	0.0014193
760	0.00141008
761	0.00140641
762	0.00139284
763	0.00138996
764	0.00139047
765	0.0013935
766	0.001393
767	0.00135903
768	0.00133423
769	0.00131092
770	0.00130425
771	0.00130654
772	0.00130117
773	0.00127656
774	0.00124783
775	0.00120493
776	0.00117595
777	0.00115803
778	0.00115012
779	0.0011441
780	0.00113685
781	0.00112304
782	0.00111441
783	0.00110374
784	0.00108954
785	0.00108067
786	0.00107206
787	0.00106527
788	0.00105862
789	0.00105161
790	0.00104765
791	0.00104178
792	0.00104078
793	0.0010703
794	0.00106085
795	0.00100786
796	0.000992474
797	0.000988909
798	0.000984318
799	0.000972813
800	0.000958985
801	0.000942438
802	0.000931918
803	0.000933414
804	0.000934296
805	0.000925431
806	0.000919618
807	0.000922933
808	0.000932
809	0.000928371
810	0.000910908
811	0.000894346
812	0.000879496
813	0.000868165
814	0.00086361
815	0.000859295
816	0.000848694
817	0.000837499
818	0.000830933
819	0.00082231
820	0.000817514
821	0.000815151
822	0.000812775
823	0.000811419
824	0.00081086
825	0.000805585
826	0.000806257
827	0.000819646
828	0.0008144
829	0.000819917
830	0.000819482
831	0.000803346
832	0.000819775
833	0.000839439
834	0.000838223
835	0.000848602
836	0.000837353
837	0.00082087
838	0.000818876
839	0.000826187
840	0.000879675
841	0.00090294
842	0.000868515
843	0.000912894
844	0.000992714
845	0.00107726
846	0.00121282
847	0.00129929
848	0.00136575
849	0.00129877
850	0.00126734
851	0.00127132
852	0.00126242
853	0.00125064
854	0.00123664
855	0.00118697
856	0.00114056
857	0.00110552
858	0.0011434
859	0.00123295
860	0.00126193
861	0.00122123
862	0.00117496
863	0.00119979
864	0.0012404
865	0.00124067
866	0.00126395
867	0.00128783
868	0.00134702
869	0.00140488
870	0.00143761
871	0.00141808
872	0.00141605
873	0.00138583
874	0.00139187
875	0.00136906
876	0.00136253
877	0.00136719
878	0.00136882
879	0.00135156
880	0.00132514
881	0.00130765
882	0.001299
883	0.00127935
884	0.00122522
885	0.00123811
886	0.00125206
887	0.00118881
888	0.00114159
889	0.00113061
890	0.00118977
891	0.00118082
892	0.00116219
893	0.00116077
894	0.00115631
895	0.00115596
896	0.00115903
897	0.00114423
898	0.00112009
899	0.00109365
900	0.00105896
901	0.00105607
902	0.00106052
903	0.00105859
904	0.00106273
905	0.00106707
906	0.00108028
907	0.00110152
908	0.00110713
909	0.00110536
910	0.0011
911	0.00109662
912	0.00109525
913	0.00106684
914	0.00105327
915	0.0010451
916	0.0010285
917	0.0010064
918	0.000939026
919	0.000859046
920	0.000841375
921	0.000848409
922	0.000892396
923	0.000891105
924	0.000854185
925	0.000840509
926	0.000841357
927	0.000832462
928	0.000823726
929	0.000820243
930	0.000817788
931	0.000815774
932	0.000816431
933	0.000812732
934	0.000806701
935	0.000789677
936	0.000757422
937	0.000749579
938	0.000748563
939	0.00070978
940	0.000641351
941	0.000572849
942	0.000551716
943	0.000556377
944	0.000561862
945	0.000567119
946	0.000607022
947	0.000632187
948	0.000642376
949	0.000648792
950	0.000691618
951	0.000720599
952	0.000696263
953	0.000692172
954	0.000691496
955	0.000695641
956	0.000733546
957	0.000774053
958	0.00077871
959	0.000781555
960	0.000798093
961	0.000849558
962	0.000901964
963	0.000964048
964	0.00104264
965	0.00107427
966	0.00106496
967	0.00106373
968	0.0010733
969	0.00109189
970	0.00107486
971	0.00108604
972	0.0010801
973	0.0010733
974	0.00108175
975	0.00107837
976	0.00105359
977	0.00106895
978	0.00113784
979	0.00118169
980	0.00122819
981	0.00124692
982	0.00131065
983	0.00135076
984	0.00139249
985	0.00142131
986	0.00141561
987	0.00139738
988	0.00139162
989	0.00137055
990	0.00134161
991	0.00131709
992	0.00130013
993	0.00127752
994	0.00125584
995	0.0012256
996	0.00121343
997	0.00120627
998	0.00120604
999	0.00121194
1000	0.00120554
1001	0.00120796
1002	0.00122286
1003	0.0012326
1004	0.00124359
1005	0.00125269
1006	0.0012514
1007	0.00123709
1008	0.00122218
1009	0.00120798
1010	0.00120091
1011	0.00120597
1012	0.00121162
1013	0.00120809
1014	0.00119819
1015	0.00118129
1016	0.0011749
1017	0.00117533
1018	0.00117197
1019	0.00112788
1020	0.00111081
1021	0.00107213
1022	0.0010106
1023	0.000931646
1024	0.000923052
1025	0.000902117
1026	0.000886476
1027	0.000890759
1028	0.00089873
1029	0.00090358
1030	0.000901275
1031	0.000897863
1032	0.000879364
1033	0.000880723
1034	0.000851343
1035	0.000823052
1036	0.000794199
1037	0.000762529
1038	0.000747384
1039	0.000741295
1040	0.000743796
1041	0.000718202
1042	0.000708943
1043	0.000703265
1044	0.000694416
1045	0.000717521
1046	0.0007219
1047	0.000711804
1048	0.000717751
1049	0.000733608
1050	0.000719483
1051	0.000716036
1052	0.000708691
1053	0.000709979
1054	0.000712585
1055	0.000728459
1056	0.000753752
1057	0.000770453
1058	0.000795764
1059	0.000832361
1060	0.000862543
1061	0.000867483
1062	0.000868004
1063	0.000846144
1064	0.000841288
1065	0.000833606
1066	0.000840198
1067	0.000861173
1068	0.000878076
1069	0.000907664
1070	0.000920801
1071	0.000919183
1072	0.000905188
1073	0.000887653
1074	0.000871094
1075	0.000874441
1076	0.000875742
1077	0.000856872
1078	0.000821844
1079	0.000802413
1080	0.000798282
1081	0.000812178
1082	0.000860998
1083	0.000928953
1084	0.000945667
1085	0.000923228
1086	0.000889892
1087	0.000851771
1088	0.000828431
1089	0.000814195
1090	0.000808651
1091	0.000803507
1092	0.000791997
1093	0.000775615
1094	0.000751967
1095	0.000732005
1096	0.000710803
1097	0.000704487
1098	0.000709888
1099	0.000720518
1100	0.000745157
1101	0.000749719
1102	0.000738731
1103	0.000754107
1104	0.000770111
1105	0.000778678
1106	0.000784591
1107	0.000792232
1108	0.000787137
1109	0.000771735
1110	0.000731345
1111	0.000688118
1112	0.000655426
1113	0.000658228
1114	0.000673125
1115	0.00069257
1116	0.000700697
1117	0.000692203
1118	0.000705095
1119	0.000716789
1120	0.000690414
1121	0.00069003
1122	0.000684342
1123	0.00066858
1124	0.000648121
1125	0.000632231
1126	0.000625817
1127	0.000615681
1128	0.000599828
1129	0.000581298
1130	0.000566885
1131	0.000550952
1132	0.0005613
1133	0.000548386
1134	0.000536936
1135	0.000547303
1136	0.000552908
1137	0.000544598
1138	0.000524484
1139	0.000500113
1140	0.000480921
1141	0.000478759
1142	0.000485045
1143	0.000490469
1144	0.00049035
1145	0.000490895
1146	0.000501448
1147	0.000506526
1148	0.00051949
1149	0.000553951
1150	0.000589131
1151	0.000637454
1152	0.000695231
1153	0.000729179
1154	0.000757681
1155	0.000776151
1156	0.000776342
1157	0.000769968
1158	0.000755612
1159	0.000728673
1160	0.000699041
1161	0.000672991
1162	0.000652427
1163	0.000637791
1164	0.000620299
1165	0.000606934
1166	0.000596111
1167	0.00057979
1168	0.000564998
1169	0.000558296
1170	0.000567599
1171	0.000575993
1172	0.000585361
1173	0.000606247
1174	0.000624355
1175	0.000651045
1176	0.000618562
1177	0.000625748
1178	0.000594114
1179	0.000570326
1180	0.000558694
1181	0.000544287
1182	0.000531875
1183	0.000525519
1184	0.000528268
1185	0.000527698
1186	0.000525303
1187	0.000524015
1188	0.00052425
1189	0.000514168
1190	0.000499992
1191	0.00050335
1192	0.000508554
1193	0.000511865
1194	0.000523731
1195	0.000522089
1196	0.000517391
1197	0.000528999
1198	0.000544642
1199	0.00054901
1200	0.000570207
1201	0.000578093
1202	0.000588301
1203	0.00058792
1204	0.000563115
1205	0.000550968
1206	0.000554687
1207	0.000560924
1208	0.000562145
1209	0.000576671
1210	0.000580357
1211	0.000570546
1212	0.000541664
1213	0.00051623
1214	0.000508903
1215	0.000503257
1216	0.000501515
1217	0.000499101
1218	0.000489165
1219	0.000488598
1220	0.000501149
1221	0.000489989
1222	0.00048458
1223	0.000437346
1224	0.000375385
1225	0.000394211
1226	0.000436843
1227	0.000454465
1228	0.000468909
1229	0.000497106
1230	0.00053048
1231	0.00053865
1232	0.000541255
1233	0.00057424
1234	0.000621486
1235	0.000607806
1236	0.000572815
1237	0.000582955
1238	0.00059085
1239	0.000622899
1240	0.000641223
1241	0.000627289
1242	0.000627287
1243	0.000656774
1244	0.000695058
1245	0.0006905
1246	0.000710153
1247	0.000724606
1248	0.000751143
1249	0.000740231
1250	0.000750791
1251	0.000739105
1252	0.000755077
1253	0.000760439
1254	0.000760651
1255	0.000762723
1256	0.00076391
1257	0.000753292
1258	0.000740052
1259	0.000762309
1260	0.000797486
1261	0.000815722
1262	0.00080606
1263	0.000795582
1264	0.000771499
1265	0.000749575
1266	0.000728231
1267	0.000696625
1268	0.000689898
1269	0.000695435
1270	0.000685303
1271	0.000669146
1272	0.000652299
1273	0.000642658
1274	0.000623826
1275	0.000593535
1276	0.000578093
1277	0.000581379
1278	0.000575948
1279	0.000565762
1280	0.000565205
1281	0.000565828
1282	0.000569695
1283	0.000574446
1284	0.000576752
1285	0.000569528
1286	0.000564874
1287	0.000568586
1288	0.000571614
1289	0.000563564
1290	0.000552132
1291	0.000534683
1292	0.00052767
1293	0.000517924
1294	0.00051065
1295	0.000504075
1296	0.000499485
1297	0.000498992
1298	0.000499076
1299	0.000498581
1300	0.000499924
1301	0.000501484
1302	0.000500924
1303	0.000500712
1304	0.00050031
1305	0.000497234
1306	0.000493478
1307	0.000492141
1308	0.000496306
1309	0.000501264
1310	0.000503609
1311	0.000506106
1312	0.000510574
1313	0.000516165
1314	0.000530177
1315	0.000545261
1316	0.000548134
1317	0.000549438
1318	0.000560702
1319	0.000576715
1320	0.000597694
1321	0.000612846
1322	0.000624823
1323	0.000639672
1324	0.000645921
1325	0.00065106
1326	0.000662193
1327	0.000669534
1328	0.000668117
1329	0.0006719
1330	0.000670678
1331	0.000671778
1332	0.000681067
1333	0.000678062
1334	0.000668469
1335	0.000674971
1336	0.00066375
1337	0.000665008
1338	0.000677749
1339	0.000678588
1340	0.000677365
1341	0.000696353
1342	0.000710667
1343	0.000703605
1344	0.000698895
1345	0.000698528
1346	0.000720488
1347	0.000742818
1348	0.000734867
1349	0.000731969
1350	0.000729661
1351	0.000728049
1352	0.000740064
1353	0.000741761
1354	0.000738443
1355	0.000725817
1356	0.000738167
1357	0.000740103
1358	0.000726958
1359	0.000726635
1360	0.000726448
1361	0.000710684
1362	0.000707647
1363	0.000709686
1364	0.000710342
1365	0.000691898
1366	0.000696048
1367	0.00071556
1368	0.000711126
1369	0.000693549
1370	0.00066222
1371	0.000601383
1372	0.000571543
1373	0.000559504
1374	0.000546896
1375	0.000536938
1376	0.000529781
1377	0.000512878
1378	0.000510924
1379	0.00052614
1380	0.00054707
1381	0.000521282
1382	0.000494651
1383	0.000482499
1384	0.000457092
1385	0.000441094
1386	0.000436471
1387	0.000433106
1388	0.000419141
1389	0.000411142
1390	0.000399422
1391	0.000403329
1392	0.000413966
1393	0.000432576
1394	0.000436272
1395	0.000435149
1396	0.000441853
1397	0.000442682
1398	0.000448719
1399	0.000445505
1400	0.000442452
1401	0.000448189
1402	0.000453286
1403	0.000459956
1404	0.000467639
1405	0.00046941
1406	0.000472323
1407	0.000473768
1408	0.000473416
1409	0.00047369
1410	0.000471597
1411	0.000481016
1412	0.000494342
1413	0.00050306
1414	0.000496598
1415	0.000495901
1416	0.000498761
1417	0.000509105
1418	0.00051386
1419	0.00051961
1420	0.000526213
1421	0.000522482
1422	0.000516948
1423	0.000508453
1424	0.000507215
1425	0.000506155
1426	0.000504018
1427	0.00050451
1428	0.000507522
1429	0.000506513
1430	0.00050366
1431	0.000499171
1432	0.00049472
1433	0.000490606
1434	0.000487202
1435	0.000487483
1436	0.000492964
1437	0.000496257
1438	0.000499865
1439	0.000501912
1440	0.000503321
1441	0.000503174
1442	0.000500741
1443	0.000496336
1444	0.000495428
1445	0.000498441
1446	0.000492264
1447	0.000484445
1448	0.000484349
1449	0.000478374
1450	0.000480333
1451	0.000476264
1452	0.000467478
1453	0.000460999
1454	0.000463342
1455	0.000460198
1456	0.000469837
1457	0.000486739
1458	0.000490374
1459	0.000493717
1460	0.000497914
1461	0.000498918
1462	0.00049689
1463	0.000495595
1464	0.000499598
1465	0.000504175
1466	0.000503479
1467	0.000500959
1468	0.000494586
1469	0.000471224
1470	0.00044592
1471	0.000446
1472	0.000450797
1473	0.000447174
1474	0.000464334
1475	0.000467608
1476	0.000458929
1477	0.000464778
1478	0.000468171
1479	0.000464962
1480	0.000455411
1481	0.000448213
1482	0.000450933
1483	0.000458517
1484	0.000469103
1485	0.000475312
1486	0.000470712
1487	0.000463396
1488	0.000469631
1489	0.000468827
1490	0.00046659
1491	0.000464137
1492	0.000461335
1493	0.000460312
1494	0.000458468
1495	0.000454984
1496	0.000454435
1497	0.000458129
1498	0.000463495
1499	0.000470704
1500	0.000488139
1501	0.000512003
1502	0.000524565
1503	0.000526019
1504	0.000519352
1505	0.000532239
1506	0.000535733
1507	0.000537803
1508	0.000527514
1509	0.00052417
1510	0.000538138
1511	0.000537146
1512	0.000534163
1513	0.000536692
1514	0.000541918
1515	0.000546303
1516	0.000553795
1517	0.000560588
1518	0.000561527
1519	0.000569008
1520	0.000583167
1521	0.000582992
1522	0.00057797
1523	0.000575594
1524	0.000579425
1525	0.00058567
1526	0.000588341
1527	0.000599748
1528	0.000600931
1529	0.000609112
1530	0.00061446
1531	0.000623773
1532	0.000630602
1533	0.000636273
1534	0.000634244
1535	0.000631068
1536	0.0006272
1537	0.000626111
1538	0.00062712
1539	0.000625544
1540	0.000624209
1541	0.000624881
1542	0.000621704
1543	0.00061699
1544	0.00061899
1545	0.000621104
1546	0.000621797
1547	0.000624284
1548	0.000626766
1549	0.000626072
1550	0.000626101
1551	0.00062667
1552	0.000624417
1553	0.000623186
1554	0.000624035
1555	0.000625552
1556	0.000624609
1557	0.000624007
1558	0.000624409
1559	0.000623937
1560	0.000624029
1561	0.000622357
1562	0.000622554
1563	0.000620033
1564	0.000616637
1565	0.000613125
1566	0.000603265
1567	0.000601414
1568	0.000601624
1569	0.000591815
1570	0.000579743
1571	0.000578033
1572	0.000569335
1573	0.000563253
1574	0.000558969
1575	0.00055718
1576	0.000557981
1577	0.000557747
1578	0.000560284
1579	0.000563067
1580	0.00056168
1581	0.000554274
1582	0.000544973
1583	0.000540172
1584	0.000535439
1585	0.000530254
1586	0.00052433
1587	0.000519113
1588	0.000513081
1589	0.000508971
1590	0.000508075
1591	0.000500362
1592	0.000488705
1593	0.000484642
1594	0.000489798
1595	0.000492932
1596	0.000495638
1597	0.000496976
1598	0.000497752
1599	0.000501088
1600	0.000503141
1601	0.000506189
1602	0.00051276
1603	0.000516556
1604	0.000517534
1605	0.000519742
1606	0.000515622
1607	0.000510835
1608	0.000505929
1609	0.000501382
1610	0.000498323
1611	0.000500837
1612	0.00050864
1613	0.000499679
1614	0.000488594
1615	0.000493105
1616	0.000486043
1617	0.000490169
1618	0.000492203
1619	0.000481205
1620	0.000470511
1621	0.000467598
1622	0.000464633
1623	0.000464495
1624	0.000464033
1625	0.00046062
1626	0.000458642
1627	0.00045496
1628	0.000455081
1629	0.000454733
1630	0.00045689
1631	0.000465458
1632	0.000465967
1633	0.000466771
1634	0.000466244
1635	0.00046473
1636	0.000461608
1637	0.000454331
1638	0.000448471
1639	0.000451286
1640	0.00045485
1641	0.000457808
1642	0.000458746
1643	0.00045574
1644	0.000453887
1645	0.000449797
1646	0.000447387
1647	0.000449409
1648	0.000449992
1649	0.000451826
1650	0.000455023
1651	0.000455045
1652	0.000453081
1653	0.000452859
1654	0.000454831
1655	0.000455178
1656	0.000457956
1657	0.000458461
1658	0.000457995
1659	0.000458642
1660	0.000455264
1661	0.00045053
1662	0.00044899
1663	0.000453208
1664	0.000459463
1665	0.000465462
1666	0.000470985
1667	0.000468622
1668	0.000472898
1669	0.000469777
1670	0.000466554
1671	0.000470858
1672	0.000484311
1673	0.000491778
1674	0.000498064
1675	0.000508152
1676	0.000525458
1677	0.000541808
1678	0.000548999
1679	0.000557791
1680	0.000558551
1681	0.000560455
1682	0.000562856
1683	0.00056503
1684	0.00056729
1685	0.000573467
1686	0.000576911
1687	0.000575928
1688	0.000575705
1689	0.000568108
1690	0.000568792
1691	0.000569286
1692	0.000572036
1693	0.000576788
1694	0.000578527
1695	0.000580747
1696	0.000586349
1697	0.00059135
1698	0.000589845
1699	0.000589788
1700	0.00058605
1701	0.000582959
1702	0.000575017
1703	0.000563935
1704	0.000552559
1705	0.000543252
1706	0.00053822
1707	0.000531955
1708	0.000534568
1709	0.000542053
1710	0.00054817
1711	0.000552849
1712	0.000552986
1713	0.000554763
1714	0.000550499
1715	0.000543035
1716	0.000533574
1717	0.000528701
1718	0.000528042
1719	0.00052713
1720	0.000531935
1721	0.000535908
1722	0.000536033
1723	0.000533765
1724	0.000529496
1725	0.000526656
1726	0.000528205
1727	0.000529327
1728	0.000530137
1729	0.000530116
1730	0.000530394
1731	0.000530479
1732	0.000530786
1733	0.000529318
1734	0.000524231
1735	0.000520579
1736	0.000523547
1737	0.000521744
1738	0.000519551
1739	0.000517512
1740	0.00051478
1741	0.000511176
1742	0.000508198
1743	0.00050683
1744	0.000505447
1745	0.00050549
1746	0.000504919
1747	0.000503439
1748	0.000502486
1749	0.000501695
1750	0.000501267
1751	0.00050127
1752	0.000500269
1753	0.000498878
1754	0.000497162
1755	0.000495015
1756	0.000492235
1757	0.00048646
1758	0.000480937
1759	0.000476028
1760	0.000467757
1761	0.000460981
1762	0.000456846
1763	0.000455544
1764	0.000455689
1765	0.000455144
1766	0.000454964
1767	0.000457784
1768	0.000462337
1769	0.000466624
1770	0.000465116
1771	0.000463068
1772	0.000465014
1773	0.000467678
1774	0.00046997
1775	0.000471769
1776	0.000473797
1777	0.000474249
1778	0.000470282
1779	0.000466231
1780	0.000464455
1781	0.000464268
1782	0.000467403
1783	0.000472162
1784	0.000475343
1785	0.000478257
1786	0.000480869
1787	0.000482572
1788	0.000479814
1789	0.000474129
1790	0.000472474
1791	0.000476733
1792	0.000477995
1793	0.000476462
1794	0.000470027
1795	0.000465255
1796	0.000462242
1797	0.000455785
1798	0.000452579
1799	0.000450074
1800	0.000449272
1801	0.000452678
1802	0.000459435
1803	0.000466722
1804	0.00046916
1805	0.000465089
1806	0.000457471
1807	0.000464991
1808	0.000472205
1809	0.000471186
1810	0.000460544
1811	0.000452645
1812	0.000444674
1813	0.000443119
1814	0.000447361
1815	0.000454709
1816	0.000460459
1817	0.000460868
1818	0.000454125
1819	0.000454521
1820	0.000453866
1821	0.000451482
1822	0.000448168
1823	0.000439403
1824	0.000451336
1825	0.000461793
1826	0.000447941
1827	0.000445006
1828	0.000450362
1829	0.000451371
1830	0.000446433
1831	0.000450217
1832	0.00044798
1833	0.000449589
1834	0.000447135
1835	0.000451302
1836	0.00044995
1837	0.000451616
1838	0.000448282
1839	0.000452499
1840	0.000453174
1841	0.000444878
1842	0.000437807
1843	0.000440594
1844	0.000441965
1845	0.000442086
1846	0.000444565
1847	0.000447124
1848	0.000439745
1849	0.000431469
1850	0.000427486
1851	0.000423218
1852	0.000420172
1853	0.000416798
1854	0.000416615
1855	0.000420081
1856	0.000419751
1857	0.000415449
1858	0.000416133
1859	0.000419072
1860	0.000424259
1861	0.000426864
1862	0.000432927
1863	0.000435383
1864	0.000435389
1865	0.000434363
1866	0.000432804
1867	0.000431842
1868	0.000429791
1869	0.000425878
1870	0.00042145
1871	0.000417548
1872	0.000416723
1873	0.000411925
1874	0.000401556
1875	0.000395023
1876	0.000389676
1877	0.000382841
1878	0.000373372
1879	0.000362634
1880	0.00036034
1881	0.000360466
1882	0.000357676
1883	0.000360551
1884	0.000366969
1885	0.000367472
1886	0.000366892
1887	0.000367936
1888	0.000366142
1889	0.000361862
1890	0.000350816
1891	0.00035223
1892	0.000358382
1893	0.000363801
1894	0.000373218
1895	0.000376894
1896	0.00037665
1897	0.000375922
1898	0.000376061
1899	0.000374105
1900	0.000370583
1901	0.000365948
1902	0.000361236
1903	0.000359441
1904	0.000354071
1905	0.000352459
1906	0.000347842
1907	0.00034805
1908	0.000348013
1909	0.000345286
1910	0.00034905
1911	0.000361589
1912	0.000367878
1913	0.0003674
1914	0.000363147
1915	0.000366099
1916	0.000366802
1917	0.000360058
1918	0.000348384
1919	0.000339159
1920	0.000337722
1921	0.000339667
1922	0.000340136
1923	0.000340518
1924	0.0003461
1925	0.000358718
1926	0.000359289
1927	0.000360663
1928	0.000362478
1929	0.000363189
1930	0.000360982
1931	0.000355941
1932	0.000355506
1933	0.000358618
1934	0.00036197
1935	0.000364131
1936	0.000364307
1937	0.000362871
1938	0.000364871
1939	0.000373403
1940	0.000378437
1941	0.000380394
1942	0.000379365
1943	0.000376984
1944	0.000374338
1945	0.000373911
1946	0.000374631
1947	0.000372149
1948	0.000365702
1949	0.000359788
1950	0.000357846
1951	0.000355659
1952	0.000355891
1953	0.00035926
1954	0.000365451
1955	0.000365736
1956	0.000364578
1957	0.000365282
1958	0.000370338
1959	0.000371324
1960	0.000372445
1961	0.000371309
1962	0.00036806
1963	0.000362677
1964	0.0003536
1965	0.000348839
1966	0.000348782
1967	0.000350318
1968	0.000352239
1969	0.00035282
1970	0.000349982
1971	0.0003457
1972	0.00034618
1973	0.000348328
1974	0.000353418
1975	0.00035959
1976	0.000363972
1977	0.000365571
1978	0.000365088
1979	0.000362107
1980	0.000356854
1981	0.00035376
1982	0.000354157
1983	0.000351786
1984	0.000350198
1985	0.000350025
1986	0.000350909
1987	0.000347802
1988	0.000343154
1989	0.00034111
1990	0.000345342
1991	0.000357144
1992	0.000363834
1993	0.000364775
1994	0.00036502
1995	0.000366128
1996	0.000364658
1997	0.00036454
1998	0.000364627
[truncated: 15,521 more rows]

## Sheet: winter329
hours	concentration
0	0
1	0
2	0
3	0
4	0
5	0
6	0
7	0
8	0
9	0
10	0
11	0
12	0
13	0
14	0
15	0
16	0
17	0
18	7.96248e-37
19	2.42857e-29
20	6.83264e-30
21	3.83067e-31
22	1.22142e-23
23	3.09168e-21
24	2.94001e-21
25	1.57431e-17
26	1.89423e-14
27	1.26909e-10
28	5.05073e-09
29	3.71028e-08
30	7.38892e-08
31	6.36713e-08
32	6.16369e-08
33	6.61736e-08
34	7.34059e-08
35	8.77842e-08
36	1.0544e-07
37	1.4258e-07
38	2.0113e-07
39	3.0016e-07
40	5.87164e-07
41	1.35008e-06
42	2.92441e-06
43	5.54937e-06
44	9.40197e-06
45	1.32278e-05
46	1.59943e-05
47	1.58118e-05
48	1.29104e-05
49	1.07552e-05
50	8.97691e-06
51	7.2349e-06
52	5.98e-06
53	6.26226e-06
54	9.05292e-06
55	1.37881e-05
56	1.97674e-05
57	2.75215e-05
58	3.51862e-05
59	3.95611e-05
60	4.10944e-05
61	4.05365e-05
62	4.04483e-05
63	4.15645e-05
64	4.31078e-05
65	4.50216e-05
66	4.6577e-05
67	4.79259e-05
68	4.89878e-05
69	4.98361e-05
70	5.05941e-05
71	5.12996e-05
72	5.17603e-05
73	5.16187e-05
74	5.05681e-05
75	4.8512e-05
76	4.57901e-05
77	4.35365e-05
78	4.28747e-05
79	4.19921e-05
80	4.06717e-05
81	3.97118e-05
82	3.89893e-05
83	3.76711e-05
84	3.55768e-05
85	3.12564e-05
86	2.40831e-05
87	1.92538e-05
88	1.66273e-05
89	1.46629e-05
90	1.35135e-05
91	1.38047e-05
92	1.7065e-05
93	5.12797e-05
94	9.86215e-05
95	0.000125925
96	0.000137124
97	0.000139803
98	0.000145169
99	0.000161937
100	0.000167461
101	0.000164681
102	0.000157796
103	0.00015508
104	0.000155517
105	0.000148848
106	0.000132893
107	0.000116479
108	0.000103201
109	9.59183e-05
110	9.23599e-05
111	9.14225e-05
112	9.08163e-05
113	9.10029e-05
114	9.08649e-05
115	9.02534e-05
116	8.96868e-05
117	9.81312e-05
118	0.000118333
119	0.00013455
120	0.000144214
121	0.00015018
122	0.000154884
123	0.000154883
124	0.000146515
125	0.000133158
126	0.000120258
127	0.000109851
128	0.000100708
129	9.2904e-05
130	8.69445e-05
131	8.27088e-05
132	8.00565e-05
133	7.84899e-05
134	7.71152e-05
135	7.64535e-05
136	7.64533e-05
137	7.69046e-05
138	7.75853e-05
139	7.83817e-05
140	7.9292e-05
141	7.97039e-05
142	8.266e-05
143	9.51759e-05
144	0.000112143
145	0.00012273
146	0.000126707
147	0.000128646
148	0.000128259
149	0.000122719
150	0.000114485
151	0.000105679
152	9.91335e-05
153	9.54282e-05
154	9.30852e-05
155	9.13476e-05
156	8.91103e-05
157	8.6562e-05
158	8.41064e-05
159	8.12048e-05
160	7.83783e-05
161	7.50728e-05
162	7.14425e-05
163	6.93545e-05
164	7.58754e-05
165	8.86717e-05
166	0.000100075
167	0.000108673
168	0.000112205
169	0.000112115
170	0.000109827
171	0.000106462
172	0.000102658
173	9.87393e-05
174	9.62197e-05
175	9.41164e-05
176	9.14263e-05
177	8.83697e-05
178	8.59039e-05
179	8.53038e-05
180	8.69865e-05
181	9.08144e-05
182	9.81991e-05
183	0.000105078
184	0.000109936
185	0.000113419
186	0.000115127
187	0.000115161
188	0.000114002
189	0.000112869
190	0.000112361
191	0.00011226
192	0.000113622
193	0.000118198
194	0.000121423
195	0.000123805
196	0.000126429
197	0.000126286
198	0.00012786
199	0.000127932
200	0.000124907
201	0.000118827
202	0.000112832
203	0.00010843
204	0.000105264
205	0.000102589
206	9.99519e-05
207	9.7992e-05
208	9.639e-05
209	9.45429e-05
210	9.2654e-05
211	9.12069e-05
212	9.01968e-05
213	8.77482e-05
214	8.54819e-05
215	8.50546e-05
216	9.14236e-05
217	0.000101236
218	0.000108277
219	0.00011876
220	0.000152467
221	0.000202253
222	0.000222347
223	0.000198662
224	0.000158959
225	0.00012112
226	0.00010583
227	0.000100326
228	9.81746e-05
229	9.76846e-05
230	9.67392e-05
231	9.65209e-05
232	9.80288e-05
233	0.000102285
234	0.000108371
235	0.000114548
236	0.000124652
237	0.000134735
238	0.000140096
239	0.00014383
240	0.000144624
241	0.000142345
242	0.000139529
243	0.000136208
244	0.00013091
245	0.000121637
246	0.000111869
247	0.000109529
248	0.000118321
249	0.000129271
250	0.000133748
251	0.00013624
252	0.000138737
253	0.000141991
254	0.000147183
255	0.00015132
256	0.000154231
257	0.00015573
258	0.000156227
259	0.000155878
260	0.00015406
261	0.000153032
262	0.000158415
263	0.000166386
264	0.000172765
265	0.000177901
266	0.000180296
267	0.00018173
268	0.000186605
269	0.000193047
270	0.00019634
271	0.000200436
272	0.000205659
273	0.000209838
274	0.000216794
275	0.000222486
276	0.000226074
277	0.000229511
278	0.000231993
279	0.000232684
280	0.000232459
281	0.000232629
282	0.000233282
283	0.000232867
284	0.000233006
285	0.000236103
286	0.000244592
287	0.000275403
288	0.000279633
289	0.000276764
290	0.000275028
291	0.000273633
292	0.000271772
293	0.000269658
294	0.00026715
295	0.000264075
296	0.000261346
297	0.000259522
298	0.000258327
299	0.000257619
300	0.000256245
301	0.000254795
302	0.000254053
303	0.000253501
304	0.00025286
305	0.000252168
306	0.000251432
307	0.00025071
308	0.000250329
309	0.000250402
310	0.000250568
311	0.000249993
312	0.000248636
313	0.000246533
314	0.000243484
315	0.000239419
316	0.000235254
317	0.000231521
318	0.000228056
319	0.000224113
320	0.000221495
321	0.000219198
322	0.000217217
323	0.000215561
324	0.000214484
325	0.000213952
326	0.000213752
327	0.000213767
328	0.000213768
329	0.000213553
330	0.00021316
331	0.00021278
332	0.000212589
333	0.00021286
334	0.000213305
335	0.000211627
336	0.000202881
337	0.000196224
338	0.000191883
339	0.000188393
340	0.000184806
341	0.000180349
342	0.000176085
343	0.000174798
344	0.000176204
345	0.000177981
346	0.000177931
347	0.000176266
348	0.000172635
349	0.000166585
350	0.000159159
351	0.000152891
352	0.000147083
353	0.000142162
354	0.000137786
355	0.000133352
356	0.000129291
357	0.000125078
358	0.000118215
359	0.000105816
360	0.000108106
361	0.000120739
362	0.000125592
363	0.000123892
364	0.000121667
365	0.000120217
366	0.000120006
367	0.000120348
368	0.000120846
369	0.000121178
370	0.000121233
371	0.000121221
372	0.000121281
373	0.000121691
374	0.000121952
375	0.000122328
376	0.000122752
377	0.000123265
378	0.000124031
379	0.000125119
380	0.000126545
381	0.000128003
382	0.000129614
383	0.000131019
384	0.000133348
385	0.00013709
386	0.000141
387	0.000141605
388	0.000141271
389	0.00014024
390	0.000137216
391	0.00013378
392	0.0001325
393	0.000132061
394	0.000131895
395	0.000131903
396	0.000131951
397	0.000132033
398	0.000132147
399	0.000132343
400	0.000132463
401	0.000132475
402	0.000132455
403	0.000132439
404	0.000132546
405	0.000132646
406	0.00013276
407	0.000132963
408	0.000133406
409	0.000134063
410	0.000134834
411	0.000135648
412	0.000136472
413	0.000137254
414	0.000137999
415	0.000138484
416	0.000138794
417	0.00013897
418	0.000139056
419	0.000139091
420	0.000139165
421	0.000139243
422	0.000139386
423	0.000139668
424	0.000140105
425	0.000140612
426	0.0001411
427	0.000141528
428	0.000141914
429	0.000142277
430	0.000142563
431	0.00014275
432	0.000142832
433	0.000142835
434	0.000142839
435	0.000142906
436	0.000143026
437	0.000143323
438	0.000143806
439	0.000144313
440	0.00014488
441	0.000145461
442	0.000143817
443	0.000138002
444	0.000124682
445	0.000124976
446	0.000127297
447	0.000129401
448	0.000131454
449	0.000131909
450	0.000131565
451	0.000131858
452	0.00013216
453	0.000132272
454	0.000131793
455	0.000130621
456	0.000129168
457	0.000128092
458	0.000127786
459	0.000128794
460	0.000131482
461	0.000136051
462	0.000130699
463	0.000125629
464	0.000122616
465	0.000122582
466	0.000123199
467	0.000123973
468	0.000126015
469	0.000128306
470	0.00012983
471	0.000130653
472	0.000130977
473	0.000130921
474	0.000130545
475	0.000129919
476	0.000129247
477	0.000128511
478	0.000128185
479	0.000128068
480	0.000127232
481	0.000126303
482	0.000125946
483	0.000126187
484	0.000126909
485	0.000127925
486	0.000128908
487	0.000129674
488	0.000130181
489	0.000130391
490	0.000130139
491	0.000129291
492	0.000128139
493	0.00012717
494	0.000126545
495	0.000126128
496	0.000125711
497	0.000125134
498	0.000124367
499	0.000123572
500	0.000122929
501	0.000122501
502	0.00012224
503	0.000122089
504	0.000122002
505	0.000121912
506	0.000121743
507	0.000121458
508	0.000121121
509	0.000120851
510	0.000120734
511	0.000120854
512	0.000121481
513	0.000122569
514	0.000123089
515	0.00012325
516	0.000123991
517	0.000125476
518	0.000127159
519	0.000127064
520	0.000124251
521	0.000119941
522	0.000114313
523	0.000112015
524	0.000117557
525	0.000116824
526	0.000114363
527	0.000114421
528	0.000114415
529	0.000114331
530	0.000114195
531	0.00011403
532	0.000113859
533	0.000113713
534	0.000113732
535	0.000113768
536	0.000113619
537	0.000113288
538	0.000112962
539	0.000112743
540	0.000112634
541	0.000112609
542	0.000112633
543	0.000112792
544	0.000113311
545	0.000113819
546	0.000114078
547	0.000114332
548	0.000114639
549	0.000114687
550	0.0001147
551	0.000115047
552	0.00011535
553	0.000115688
554	0.000116033
555	0.000116615
556	0.000117026
557	0.000117108
558	0.000117192
559	0.000117161
560	0.000116951
561	0.000116836
562	0.000116819
563	0.000116777
564	0.000116714
565	0.000116617
566	0.000116503
567	0.000116184
568	0.000115798
569	0.000115356
570	0.000114961
571	0.000114747
572	0.000114795
573	0.00011522
574	0.000115566
575	0.000115292
576	0.000114546
577	0.00011398
578	0.000113961
579	0.000114658
580	0.000115146
581	0.000115276
582	0.00011516
583	0.000114913
584	0.000114569
585	0.000114197
586	0.000113889
587	0.000113727
588	0.000113706
589	0.000113903
590	0.000114355
591	0.000114995
592	0.000115609
593	0.000116077
594	0.000116331
595	0.000116255
596	0.000115986
597	0.000115452
598	0.000115551
599	0.000119438
600	0.0001218
601	0.000122061
602	0.000121643
603	0.000120014
604	0.000118866
605	0.000118932
606	0.000118575
607	0.000118126
608	0.000117636
609	0.000117105
610	0.000116648
611	0.000116487
612	0.000116419
613	0.000116061
614	0.000115523
615	0.000115108
616	0.000114784
617	0.000114466
618	0.000114276
619	0.000114157
620	0.000114104
621	0.000114103
622	0.000114079
623	0.000113729
624	0.000113277
625	0.000112834
626	0.000112407
627	0.000111638
628	0.0001106
629	0.000108619
630	0.000106241
631	0.000104336
632	0.000102934
633	0.000101907
634	0.000101125
635	0.000100367
636	0.000100261
637	0.000100884
638	0.000101511
639	0.000102074
640	0.00010291
641	0.000104017
642	0.000104964
643	0.00010553
644	0.000105679
645	0.000105673
646	0.000105868
647	0.000106753
648	0.000108366
649	0.000109875
650	0.000110462
651	0.00011075
652	0.000112524
653	0.000114239
654	0.00011539
655	0.000116087
656	0.000116566
657	0.00011694
658	0.000117257
659	0.000117552
660	0.000117843
661	0.000118122
662	0.000118385
663	0.000118613
664	0.000118809
665	0.000118954
666	0.000119042
667	0.000119078
668	0.000119091
669	0.000118814
670	0.000117832
671	0.000116319
672	0.000115526
673	0.000115237
674	0.000115061
675	0.000115017
676	0.000115043
677	0.00011532
678	0.000115617
679	0.000115982
680	0.000116466
681	0.000117059
682	0.000117713
683	0.000118409
684	0.000119244
685	0.000119838
686	0.000120268
687	0.000120609
688	0.000120976
689	0.00012133
690	0.000121636
691	0.000121911
692	0.000122147
693	0.000122323
694	0.000122492
695	0.000122802
696	0.000123511
697	0.000124579
698	0.000125654
699	0.000126459
700	0.000127001
701	0.000127429
702	0.000127775
703	0.000128076
704	0.000128392
705	0.000128794
706	0.000129104
707	0.000129378
708	0.000129656
709	0.000129927
710	0.000130174
711	0.000130267
712	0.000129637
713	0.000128027
714	0.000126826
715	0.000125783
716	0.000125501
717	0.000125032
718	0.000124744
719	0.000124261
720	0.000123495
721	0.0001234
722	0.000123988
723	0.00012506
724	0.000126411
725	0.000127177
726	0.000127607
727	0.000127837
728	0.000127531
729	0.000126711
730	0.000126753
731	0.000127069
732	0.00012718
733	0.000127171
734	0.000126648
735	0.000124934
736	0.000123036
737	0.000121561
738	0.0001206
739	0.000120416
740	0.000121615
741	0.000122732
742	0.000123163
743	0.000123556
744	0.000123408
745	0.000122942
746	0.000123506
747	0.00012456
748	0.000123701
749	0.000123209
750	0.000123635
751	0.00012353
752	0.00012147
753	0.000120473
754	0.000120896
755	0.000122067
756	0.000123559
757	0.000123953
758	0.000123975
759	0.000123857
760	0.000123888
761	0.000124173
762	0.000124599
763	0.000124993
764	0.000125052
765	0.000125009
766	0.000124929
767	0.000124445
768	0.000123582
769	0.000123025
770	0.0001231
771	0.0001234
772	0.000123371
773	0.000123202
774	0.00012351
775	0.000123793
776	0.000124089
777	0.000124312
778	0.000124561
779	0.000124957
780	0.000125532
781	0.000126218
782	0.00012682
783	0.000127539
784	0.000127767
785	0.000126933
786	0.000126677
787	0.000126765
788	0.00012708
789	0.000127227
790	0.000127631
791	0.000128402
792	0.000128613
793	0.000128366
794	0.000127858
795	0.000127494
796	0.000127378
797	0.000127247
798	0.000127135
799	0.00012709
800	0.000127253
801	0.000127305
802	0.00012714
803	0.0001269
804	0.000126744
805	0.000126792
806	0.00012692
807	0.000127042
808	0.000127156
809	0.000127295
810	0.000127412
811	0.000127569
812	0.00012771
813	0.000127795
814	0.000127807
815	0.000127754
816	0.000127522
817	0.000127209
818	0.000127843
819	0.000128292
820	0.000128304
821	0.000128296
822	0.000128343
823	0.000128344
824	0.000128044
825	0.000127378
826	0.000126595
827	0.000126032
828	0.000125799
829	0.000125712
830	0.000125601
831	0.000125452
832	0.000125273
833	0.000125092
834	0.000124918
835	0.000124754
836	0.000124625
837	0.000124552
838	0.000124508
839	0.000124468
840	0.000124434
841	0.00012437
842	0.000124158
843	0.000123488
844	0.000122443
845	0.000121889
846	0.000121662
847	0.000121663
848	0.000121827
849	0.000122012
850	0.000122165
851	0.000122264
852	0.000122207
853	0.000122011
854	0.000121876
855	0.000121849
856	0.000121811
857	0.000122099
858	0.000124051
859	0.000125358
860	0.000124791
861	0.000123318
862	0.000122008
863	0.000121899
864	0.000121939
865	0.000121971
866	0.000121946
867	0.000121876
868	0.000121808
869	0.000121781
870	0.000121776
871	0.000121808
872	0.000121899
873	0.000122038
874	0.000122154
875	0.000122209
876	0.000122185
877	0.00012211
878	0.000122034
879	0.000121984
880	0.000121976
881	0.000122042
882	0.000122238
883	0.000122627
884	0.000123391
885	0.000124922
886	0.00012431
887	0.000122765
888	0.00012276
889	0.000123122
890	0.000123198
891	0.000123174
892	0.00012315
893	0.000123149
894	0.000123022
895	0.000122716
896	0.000122321
897	0.000122029
898	0.00012197
899	0.000122114
900	0.000122542
901	0.000122883
902	0.000123012
903	0.00012301
904	0.000122893
905	0.000122572
906	0.000122436
907	0.000122451
908	0.000122458
909	0.00012248
910	0.000122489
911	0.000122513
912	0.00012256
913	0.000122688
914	0.000123151
915	0.000122221
916	0.000122086
917	0.000122053
918	0.000121953
919	0.000121838
920	0.000121699
921	0.000122066
922	0.000122635
923	0.000122751
924	0.000122632
925	0.000122505
926	0.000122442
927	0.000121681
928	0.000119915
929	0.00011908
930	0.00011858
931	0.000118616
932	0.000117107
933	0.000116979
934	0.000117157
935	0.000117446
936	0.000117666
937	0.000117948
938	0.000118019
939	0.00011807
940	0.000118099
941	0.000118072
942	0.000118011
943	0.000117937
944	0.000117849
945	0.000117733
946	0.000117605
947	0.000117507
948	0.000117438
949	0.000117399
950	0.000117375
951	0.00011736
952	0.000117359
953	0.000117367
954	0.000117378
955	0.000117384
956	0.000117391
957	0.000117398
958	0.000117417
959	0.000117463
960	0.000117538
961	0.000117615
962	0.000117708
963	0.000117773
964	0.000117827
965	0.000117875
966	0.000117886
967	0.000117846
968	0.000117884
969	0.000118438
970	0.00011942
971	0.000120121
972	0.000120439
973	0.000120626
974	0.000120788
975	0.000120922
976	0.00012101
977	0.000120991
978	0.00012079
979	0.000120527
980	0.000120352
981	0.000120245
982	0.000120158
983	0.000120133
984	0.000120028
985	0.000119455
986	0.000119256
987	0.000119375
988	0.000119479
989	0.000119515
990	0.000119553
991	0.00011959
992	0.000119754
993	0.000119859
994	0.000119973
995	0.00012011
996	0.000120254
997	0.000120422
998	0.000120573
999	0.000120681
1000	0.000120754
1001	0.000120805
1002	0.000120851
1003	0.000120903
1004	0.000120926
1005	0.000120923
1006	0.000120894
1007	0.00012088
1008	0.000120904
1009	0.000120942
1010	0.000121006
1011	0.000121116
1012	0.000121251
1013	0.000121383
1014	0.000121495
1015	0.000121578
1016	0.000121668
1017	0.000121776
1018	0.000121927
1019	0.000122135
1020	0.000122365
1021	0.000122583
1022	0.0001228
1023	0.000123077
1024	0.000123375
1025	0.000123582
1026	0.000123628
1027	0.00012362
1028	0.000123567
1029	0.000123243
1030	0.000122749
1031	0.000122515
1032	0.000122519
1033	0.00012258
1034	0.000122633
1035	0.000122676
1036	0.000122715
1037	0.000122746
1038	0.000122764
1039	0.000122769
1040	0.000122765
1041	0.000122755
1042	0.000122746
1043	0.000122739
1044	0.000122737
1045	0.000122733
1046	0.000122719
1047	0.000122697
1048	0.000122676
1049	0.000122665
1050	0.000122676
1051	0.000122708
1052	0.000122755
1053	0.000122806
1054	0.000122866
1055	0.00012294
1056	0.000123013
1057	0.000123079
1058	0.000123187
1059	0.000123372
1060	0.000123522
1061	0.000123602
1062	0.000123637
1063	0.000123678
1064	0.000123871
1065	0.000124198
1066	0.00012444
1067	0.000124585
1068	0.000124698
1069	0.000124866
1070	0.000125104
1071	0.000125276
1072	0.000125275
1073	0.000125148
1074	0.00012487
1075	0.000124561
1076	0.000124299
1077	0.000124156
1078	0.000124162
1079	0.000124275
1080	0.000124444
1081	0.000124627
1082	0.000124769
1083	0.000124729
1084	0.000124379
1085	0.00012372
1086	0.000123289
1087	0.000122933
1088	0.000122826
1089	0.000122967
1090	0.000123203
1091	0.000123373
1092	0.000123557
1093	0.000123722
1094	0.000123813
1095	0.000123763
1096	0.000123574
1097	0.000123284
1098	0.000123009
1099	0.000122827
1100	0.00012275
1101	0.000122778
1102	0.000122837
1103	0.000122992
1104	0.0001232
1105	0.000123281
1106	0.00012319
1107	0.000123355
1108	0.000123827
1109	0.00012507
1110	0.000125984
1111	0.000125437
1112	0.000124498
1113	0.000124054
1114	0.000124236
1115	0.000124487
1116	0.0001245
1117	0.000124563
1118	0.000124436
1119	0.00012484
1120	0.000125082
1121	0.000125674
1122	0.000126515
1123	0.000127028
1124	0.000126695
1125	0.000125431
1126	0.000123765
1127	0.000122044
1128	0.000120145
1129	0.000117699
1130	0.000116731
1131	0.000117493
1132	0.000118778
1133	0.000119804
1134	0.000119867
1135	0.00011941
1136	0.000118806
1137	0.000118271
1138	0.000117378
1139	0.000115959
1140	0.0001142
1141	0.000112378
1142	0.000110452
1143	0.000108821
1144	0.000107401
1145	0.00010634
1146	0.000105762
1147	0.000105618
1148	0.000105692
1149	0.000105749
1150	0.000105823
1151	0.000105992
1152	0.000106661
1153	0.00010766
1154	0.000108809
1155	0.000109982
1156	0.000110782
1157	0.000111272
1158	0.000111353
1159	0.000111041
1160	0.000111049
1161	0.000111433
1162	0.000111875
1163	0.000112147
1164	0.000112289
1165	0.000112253
1166	0.000112304
1167	0.000112546
1168	0.000112811
1169	0.00011294
1170	0.000112798
1171	0.0001125
1172	0.000112343
1173	0.000112312
1174	0.00011246
1175	0.000112673
1176	0.00011286
1177	0.000112898
1178	0.000112245
1179	0.000112233
1180	0.000113816
1181	0.000114276
1182	0.000113999
1183	0.000113955
1184	0.000113873
1185	0.000113669
1186	0.000113518
1187	0.000113493
1188	0.00011352
1189	0.000113575
1190	0.000113466
1191	0.000112878
1192	0.000111911
1193	0.000110696
1194	0.000109495
1195	0.000108346
1196	0.000107625
1197	0.000107503
1198	0.000107542
1199	0.000107657
1200	0.000107935
1201	0.00010833
1202	0.000108735
1203	0.000109093
1204	0.000109359
1205	0.000109482
1206	0.00010951
1207	0.000109378
1208	0.000108947
1209	0.000108951
1210	0.000110565
1211	0.000111463
1212	0.000111348
1213	0.000111081
1214	0.000111168
1215	0.000111615
1216	0.000112396
1217	0.000113234
1218	0.000113988
1219	0.000114692
1220	0.000115421
1221	0.000116113
1222	0.000116733
1223	0.000117293
1224	0.000117821
1225	0.000118106
1226	0.00011825
1227	0.00011832
1228	0.000118344
1229	0.000118376
1230	0.000118392
1231	0.000118285
1232	0.000117937
1233	0.000117577
1234	0.000117379
1235	0.000117425
1236	0.000117743
1237	0.000118215
1238	0.000118586
1239	0.000118762
1240	0.000118839
1241	0.000118866
1242	0.000118842
1243	0.000118741
1244	0.000118528
1245	0.000118118
1246	0.000117466
1247	0.0001167
1248	0.000116119
1249	0.000115639
1250	0.000115289
1251	0.000115177
1252	0.000115349
1253	0.000115741
1254	0.00011593
1255	0.000116075
1256	0.000116106
1257	0.000116088
1258	0.000116064
1259	0.000116029
1260	0.000116016
1261	0.000115987
1262	0.000116033
1263	0.000116175
1264	0.000116285
1265	0.00011634
1266	0.000116362
1267	0.000116305
1268	0.000116215
1269	0.00011612
1270	0.000116036
1271	0.000115968
1272	0.000115914
1273	0.000115867
1274	0.000115821
1275	0.000115801
1276	0.000115808
1277	0.000115815
1278	0.00011581
1279	0.00011577
1280	0.000115692
1281	0.000115708
1282	0.000115761
1283	0.000115635
1284	0.000115404
1285	0.000115049
1286	0.000114692
1287	0.000114428
1288	0.000114279
1289	0.000114167
1290	0.000114086
1291	0.000113951
1292	0.00011371
1293	0.000113322
1294	0.000112869
1295	0.000112468
1296	0.000112146
1297	0.00011195
1298	0.000111836
1299	0.000111681
1300	0.000111498
1301	0.00011117
1302	0.000110788
1303	0.000110628
1304	0.000110556
1305	0.000110602
1306	0.000110809
1307	0.000111095
1308	0.000111364
1309	0.000111624
1310	0.00011185
1311	0.000112114
1312	0.000112487
1313	0.000112958
1314	0.000113622
1315	0.000113933
1316	0.000113946
1317	0.000113815
1318	0.000113614
1319	0.000113196
1320	0.000112519
1321	0.000111408
1322	0.000109755
1323	0.00010798
1324	0.000106363
1325	0.000104982
1326	0.000103717
1327	0.000102503
1328	0.000101426
1329	0.000100454
1330	9.95584e-05
1331	9.8568e-05
1332	9.79056e-05
1333	9.72812e-05
1334	9.6147e-05
1335	9.48168e-05
1336	9.35177e-05
1337	9.3023e-05
1338	9.40944e-05
1339	9.64492e-05
1340	9.97342e-05
1341	0.000102121
1342	0.000103491
1343	0.00010416
1344	0.000104367
1345	0.000104391
1346	0.000104392
1347	0.00010446
1348	0.00010453
1349	0.000104559
1350	0.000104541
1351	0.000104497
1352	0.000104479
1353	0.000104473
1354	0.000104624
1355	0.000104959
1356	0.000105347
1357	0.000105734
1358	0.000106078
1359	0.000106313
1360	0.000106502
1361	0.000106675
1362	0.000106812
1363	0.000106977
1364	0.000107125
1365	0.000107174
1366	0.000107185
1367	0.00010714
1368	0.000106836
1369	0.000106988
1370	0.000106885
1371	0.000105714
1372	0.000105258
1373	0.000104741
1374	0.000104272
1375	0.000103818
1376	0.00010354
1377	0.000103572
1378	0.000103771
1379	0.000103886
1380	0.000103972
1381	0.000104095
1382	0.000104185
1383	0.000104261
1384	0.000104274
1385	0.000104248
1386	0.000104183
1387	0.000104139
1388	0.000103937
1389	0.000103449
1390	0.000103069
1391	0.000103056
1392	0.000103175
1393	0.000103443
1394	0.000103707
1395	0.00010399
1396	0.000104321
1397	0.000104718
1398	0.000105136
1399	0.000105459
1400	0.000105702
1401	0.000105898
1402	0.000106086
1403	0.000106281
1404	0.000106503
1405	0.000106717
1406	0.000106905
1407	0.000107077
1408	0.000107249
1409	0.000107412
1410	0.000107587
1411	0.000107746
1412	0.000107893
1413	0.000108035
1414	0.000108177
1415	0.000108327
1416	0.00010847
1417	0.000108598
1418	0.000108704
1419	0.000108781
1420	0.000108805
1421	0.000108809
1422	0.000108792
1423	0.000108748
1424	0.000108672
1425	0.000108523
1426	0.00010827
1427	0.000107935
1428	0.000107553
1429	0.000107161
1430	0.000106818
1431	0.000106518
1432	0.000106278
1433	0.00010611
1434	0.000106002
1435	0.000105934
1436	0.000105915
1437	0.000105932
1438	0.000106032
1439	0.000106203
1440	0.000106385
1441	0.000106551
1442	0.000106711
1443	0.000106877
1444	0.000107038
1445	0.000107179
1446	0.00010728
1447	0.000107336
1448	0.000107303
1449	0.000107114
1450	0.000106796
1451	0.000106361
1452	0.000105813
1453	0.000105115
1454	0.000104344
1455	0.000103473
1456	0.000102535
1457	0.000101618
1458	0.000100698
1459	9.97378e-05
1460	9.87404e-05
1461	9.77799e-05
1462	9.69506e-05
1463	9.62322e-05
1464	9.56969e-05
1465	9.54592e-05
1466	9.55329e-05
1467	9.56492e-05
1468	9.55455e-05
1469	9.45389e-05
1470	9.3031e-05
1471	9.27429e-05
1472	9.28727e-05
1473	9.25863e-05
1474	9.25077e-05
1475	9.26181e-05
1476	9.2778e-05
1477	9.31056e-05
1478	9.36564e-05
1479	9.44433e-05
1480	9.50763e-05
1481	9.51934e-05
1482	9.52947e-05
1483	9.52423e-05
1484	9.49967e-05
1485	9.47428e-05
1486	9.45721e-05
1487	9.43581e-05
1488	9.39605e-05
1489	9.34034e-05
1490	9.25647e-05
1491	9.17478e-05
1492	9.12536e-05
1493	9.12263e-05
1494	9.16143e-05
1495	9.23053e-05
1496	9.34064e-05
1497	9.52203e-05
1498	9.77097e-05
1499	9.875e-05
1500	9.88561e-05
1501	9.92275e-05
1502	9.90157e-05
1503	9.81478e-05
1504	9.56171e-05
1505	9.26561e-05
1506	9.09493e-05
1507	9.0167e-05
1508	9.00662e-05
1509	9.04745e-05
1510	9.15353e-05
1511	9.33239e-05
1512	9.54103e-05
1513	9.63165e-05
1514	9.69792e-05
1515	9.77544e-05
1516	9.85748e-05
1517	9.94664e-05
1518	0.000100302
1519	0.000101
1520	0.000101444
1521	0.000101353
1522	0.000100398
1523	9.85732e-05
1524	9.7098e-05
1525	9.66179e-05
1526	9.67826e-05
1527	9.72214e-05
1528	9.80497e-05
1529	9.97696e-05
1530	0.000101586
1531	0.000102769
1532	0.000103319
1533	0.000103554
1534	0.000103549
1535	0.000103511
1536	0.000103593
1537	0.000104203
1538	0.000105193
1539	0.000106031
1540	0.000106624
1541	0.000106979
1542	0.000107051
1543	0.000106953
1544	0.000106764
1545	0.000106416
1546	0.000105908
1547	0.000105401
1548	0.000105011
1549	0.000104766
1550	0.00010469
1551	0.000104744
1552	0.000104884
1553	0.000105047
1554	0.000105124
1555	0.000105071
1556	0.000104907
1557	0.000104703
1558	0.000104623
1559	0.000104652
1560	0.00010461
1561	0.000104537
1562	0.000104471
1563	0.00010438
1564	0.000104239
1565	0.0001041
1566	0.000103998
1567	0.000103951
1568	0.00010396
1569	0.000103944
1570	0.00010379
1571	0.000103444
1572	0.000102993
1573	0.000102531
1574	0.000102181
1575	0.000102078
1576	0.000102231
1577	0.00010245
1578	0.00010265
1579	0.000102837
1580	0.000103067
1581	0.000103338
1582	0.000103547
1583	0.000103568
1584	0.000103374
1585	0.000103196
1586	0.000103217
1587	0.000103246
1588	0.000103252
1589	0.000103405
1590	0.000104175
1591	0.000104786
1592	0.000104822
1593	0.000104466
1594	0.000103905
1595	0.00010322
1596	0.000102629
1597	0.000102331
1598	0.000102219
1599	0.000102183
1600	0.00010206
1601	0.000101816
1602	0.000101672
1603	0.000101913
1604	0.000102265
1605	0.000102728
1606	0.000103234
1607	0.000103613
1608	0.000103808
1609	0.000103872
1610	0.000103917
1611	0.000104061
1612	0.000104346
1613	0.000104651
1614	0.000104839
1615	0.00010505
1616	0.000105164
1617	0.000105057
1618	0.00010466
1619	0.000104297
1620	0.000104033
1621	0.000103842
1622	0.00010366
1623	0.000103502
1624	0.000103376
1625	0.000103249
1626	0.000103119
1627	0.000102976
1628	0.00010285
1629	0.000102788
1630	0.000102782
1631	0.000102868
1632	0.000102971
1633	0.00010331
1634	0.000104113
1635	0.000104874
1636	0.000105315
1637	0.000105512
1638	0.000105592
1639	0.000105624
1640	0.0001057
1641	0.000105737
1642	0.0001056
1643	0.000105133
1644	0.000104754
1645	0.000104597
1646	0.000104566
1647	0.000104624
1648	0.000104745
1649	0.000104916
1650	0.000105075
1651	0.000105129
1652	0.000104746
1653	0.000104083
1654	0.000104227
1655	0.000105217
1656	0.000105055
1657	0.00010414
1658	0.000105003
1659	0.000105128
1660	0.000105096
1661	0.000105056
1662	0.000105041
1663	0.000105035
1664	0.00010507
1665	0.000104618
1666	0.000103404
1667	0.000102474
1668	0.000102912
1669	0.000104114
1670	0.000104949
1671	0.000105166
1672	0.000105037
1673	0.000104857
1674	0.000104589
1675	0.000104175
1676	0.000103732
1677	0.000103614
1678	0.000104035
1679	0.00010464
1680	0.000104972
1681	0.000104979
1682	0.000104413
1683	0.000102749
1684	0.00010147
1685	0.000102372
1686	0.000103958
1687	0.000104711
1688	0.000105002
1689	0.000105005
1690	0.000104887
1691	0.00010465
1692	0.00010422
1693	0.000103751
1694	0.000103419
1695	0.000103178
1696	0.000103134
1697	0.000103533
1698	0.000104159
1699	0.000104773
1700	0.00010528
1701	0.000105551
1702	0.000105672
1703	0.000105701
1704	0.000105668
1705	0.000105745
1706	0.000105548
1707	0.000105138
1708	0.00010478
1709	0.000105001
1710	0.000104864
1711	0.000104741
1712	0.00010464
1713	0.000104796
1714	0.00010524
1715	0.000105775
1716	0.000105982
1717	0.00010572
1718	0.000105565
1719	0.000105784
1720	0.000103955
1721	9.99665e-05
1722	9.83376e-05
1723	9.95773e-05
1724	0.000102065
1725	0.000103728
1726	0.000104859
1727	0.000105538
1728	0.000105602
1729	0.000105538
1730	0.000105445
1731	0.000105443
1732	0.000105531
1733	0.000105663
1734	0.00010573
1735	0.000105695
1736	0.000105205
1737	0.000100529
1738	9.67161e-05
1739	9.86415e-05
1740	0.000102191
1741	0.00010384
1742	0.000104571
1743	0.000104986
1744	0.000105289
1745	0.000105364
1746	0.000105274
1747	0.000105169
1748	0.000105144
1749	0.00010518
1750	0.000105213
1751	0.000105237
1752	0.000105216
1753	0.000105096
1754	0.000104943
1755	0.000104975
1756	0.000105106
1757	0.000105108
1758	0.000105145
1759	0.000105331
1760	0.000105588
1761	0.000105814
1762	0.000105847
1763	0.000105634
1764	0.000105425
1765	0.000105528
1766	0.000105848
1767	0.000106161
1768	0.00010635
1769	0.000106446
1770	0.00010649
1771	0.000106522
1772	0.000106557
1773	0.000106603
1774	0.000106667
1775	0.000106667
1776	0.000106661
1777	0.000106358
1778	0.000101398
1779	9.08536e-05
1780	8.40356e-05
1781	8.50711e-05
1782	9.29132e-05
1783	0.000100499
1784	0.000104084
1785	0.000105349
1786	0.000105865
1787	0.000106017
1788	0.000106029
1789	0.000106037
1790	0.000106046
1791	0.00010605
1792	0.000106037
1793	0.000106033
1794	0.000105559
1795	0.000101398
1796	9.63105e-05
1797	9.68424e-05
1798	0.000102003
1799	0.000105251
1800	0.000105876
1801	0.00010582
1802	0.000105702
1803	0.000105455
1804	0.00010526
1805	0.000105156
1806	0.000105171
1807	0.00010521
1808	0.000105253
1809	0.000105287
1810	0.000105307
1811	0.000105317
1812	0.000105317
1813	0.000105276
1814	0.000105271
1815	0.000105277
1816	0.000105283
1817	0.000105332
1818	0.000105422
1819	0.000105549
1820	0.000105664
1821	0.000105747
1822	0.000105806
1823	0.000105834
1824	0.000105856
1825	0.000105883
1826	0.000105916
1827	0.000105978
1828	0.000106042
1829	0.000106075
1830	0.000106096
1831	0.000106142
1832	0.000106165
1833	0.000106219
1834	0.000106261
1835	0.000106219
1836	0.000105975
1837	0.000105781
1838	0.000105801
1839	0.000105971
1840	0.000105964
1841	0.000105307
1842	0.000104345
1843	0.00010445
1844	0.000105203
1845	0.00010563
1846	0.000105548
1847	0.000105847
1848	0.000105959
1849	0.000105545
1850	0.000105341
1851	0.000105791
1852	0.000105859
1853	9.69751e-05
1854	8.37696e-05
1855	7.67271e-05
1856	7.98443e-05
1857	9.09453e-05
1858	9.96109e-05
1859	0.000102669
1860	0.000103487
1861	0.000103879
1862	0.000104348
1863	0.000104589
1864	0.000104881
1865	0.000104811
1866	0.000104416
1867	0.000101662
1868	8.21302e-05
1869	6.60182e-05
1870	6.15607e-05
1871	6.63631e-05
1872	7.92165e-05
1873	9.34146e-05
1874	9.95506e-05
1875	0.000100265
1876	0.000100641
1877	0.000101183
1878	0.000101477
1879	0.000101867
1880	0.000103262
1881	0.000104078
1882	0.00010243
1883	9.04774e-05
1884	6.59346e-05
1885	5.49553e-05
1886	5.56862e-05
1887	6.9721e-05
1888	8.93106e-05
1889	9.91031e-05
1890	0.000100836
1891	0.000100211
1892	0.000100084
1893	0.000100848
1894	0.000101791
1895	0.000101332
1896	9.93629e-05
1897	8.023e-05
1898	6.299e-05
1899	5.74942e-05
1900	5.9714e-05
1901	6.89272e-05
1902	8.26765e-05
1903	9.26661e-05
1904	9.52076e-05
1905	9.59091e-05
1906	9.75921e-05
1907	9.96462e-05
1908	0.000100886
1909	0.000100914
1910	9.92457e-05
1911	9.58397e-05
1912	8.74098e-05
1913	7.88161e-05
1914	7.48735e-05
1915	7.55516e-05
1916	7.94139e-05
1917	8.45511e-05
1918	8.95197e-05
1919	9.32918e-05
1920	9.54408e-05
1921	9.64156e-05
1922	9.68594e-05
1923	9.71399e-05
1924	9.74518e-05
1925	9.77901e-05
1926	9.78706e-05
1927	9.73875e-05
1928	9.64596e-05
1929	9.5373e-05
1930	9.52327e-05
1931	9.60695e-05
1932	9.76886e-05
1933	9.94829e-05
1934	0.000100717
1935	0.000101259
1936	0.000101276
1937	0.000101275
1938	0.00010139
1939	0.000102189
1940	0.000102989
1941	0.000102416
1942	0.000101151
1943	9.84885e-05
1944	9.33156e-05
1945	9.03749e-05
1946	9.20382e-05
1947	9.5119e-05
1948	9.97464e-05
1949	0.000102705
1950	0.000103339
1951	0.000103452
1952	0.000103485
1953	0.000103457
1954	0.000102398
1955	9.8518e-05
1956	9.18218e-05
1957	8.69912e-05
1958	8.67004e-05
1959	9.01026e-05
1960	9.51611e-05
1961	9.93274e-05
1962	0.000101424
1963	0.000101709
1964	0.000100175
1965	9.51457e-05
1966	8.57868e-05
1967	7.67899e-05
1968	7.08068e-05
1969	6.89058e-05
1970	7.17082e-05
1971	7.94589e-05
1972	8.59936e-05
1973	8.55553e-05
1974	7.99106e-05
1975	7.48429e-05
1976	7.53369e-05
1977	8.12087e-05
1978	8.66557e-05
1979	8.86135e-05
1980	8.62035e-05
1981	7.58526e-05
1982	6.73257e-05
1983	7.32688e-05
1984	8.6655e-05
1985	9.49259e-05
1986	9.76111e-05
1987	9.62998e-05
1988	9.31629e-05
1989	8.79634e-05
1990	8.0742e-05
1991	7.97289e-05
1992	8.06532e-05
1993	8.14682e-05
1994	8.47226e-05
1995	9.33952e-05
1996	9.91607e-05
1997	9.91992e-05
1998	9.79207e-05
[truncated: 15,521 more rows]

## Sheet: fall329
hours	concentration
0	0
1	0
2	0
3	0
4	0
5	0
6	0
7	0
8	0
9	6.10281e-35
10	6.29065e-33
11	4.56417e-33
12	1.88956e-34
13	1.79132e-34
14	1.7771e-34
15	1.82273e-34
16	1.88664e-34
17	2.16866e-34
18	3.74546e-33
19	1.54442e-34
20	1.81411e-34
21	8.16147e-35
22	7.85016e-35
23	7.77702e-35
24	7.77702e-35
25	6.70592e-35
26	2.91167e-35
27	4.91718e-24
28	1.62901e-23
29	2.3711e-26
30	3.24333e-21
31	1.05774e-21
32	8.57472e-22
33	2.21457e-21
34	1.63311e-21
35	3.29712e-21
36	4.92289e-17
37	3.70975e-18
38	6.14879e-19
39	6.56361e-18
40	2.51654e-17
41	4.43755e-17
42	4.80228e-16
43	7.38854e-16
44	9.26426e-16
45	1.18658e-15
46	2.93074e-15
47	1.53472e-14
48	3.62447e-12
49	7.15937e-12
50	7.9047e-12
51	8.27791e-12
52	7.37755e-12
53	6.05963e-12
54	7.84754e-12
55	1.12084e-11
56	1.53858e-11
57	1.98632e-11
58	4.84206e-11
59	1.51802e-10
60	1.77944e-10
61	1.04565e-10
62	1.46564e-11
63	1.23402e-12
64	1.29677e-12
65	1.3786e-11
66	4.94507e-11
67	1.48565e-10
68	2.62742e-10
69	2.96884e-10
70	2.82522e-10
71	3.52685e-10
72	3.37444e-10
73	1.37942e-10
74	7.24648e-11
75	9.34285e-11
76	9.11172e-11
77	1.13112e-10
78	1.58487e-08
79	1.40493e-11
80	3.15404e-09
81	1.75704e-08
82	2.19781e-08
83	1.31297e-07
84	1.77157e-07
85	1.79766e-07
86	2.43605e-07
87	2.3687e-07
88	7.25311e-07
89	1.5541e-06
90	1.44872e-06
91	9.90971e-07
92	6.80343e-07
93	3.28999e-06
94	1.13434e-05
95	1.84682e-05
96	2.4601e-05
97	3.00506e-05
98	2.6831e-05
99	3.76738e-05
100	6.12697e-05
101	6.90618e-05
102	7.78043e-05
103	8.49986e-05
104	7.7422e-05
105	5.51596e-05
106	4.10951e-05
107	3.67316e-05
108	4.96886e-05
109	5.55701e-05
110	5.16105e-05
111	4.9992e-05
112	5.85133e-05
113	6.33659e-05
114	6.36797e-05
115	6.45333e-05
116	6.46046e-05
117	6.45138e-05
118	6.38753e-05
119	6.27311e-05
120	6.17235e-05
121	6.12631e-05
122	6.09834e-05
123	5.86463e-05
124	5.36692e-05
125	4.85389e-05
126	4.28179e-05
127	3.66706e-05
128	3.27325e-05
129	3.00955e-05
130	2.95154e-05
131	2.92325e-05
132	2.71528e-05
133	2.32479e-05
134	1.95727e-05
135	1.75001e-05
136	1.61755e-05
137	1.51529e-05
138	1.37168e-05
139	1.21924e-05
140	1.1153e-05
141	1.06566e-05
142	1.05766e-05
143	1.04147e-05
144	1.01687e-05
145	9.73093e-06
146	9.02214e-06
147	8.94114e-06
148	8.65472e-06
149	8.57211e-06
150	8.62576e-06
151	8.53266e-06
152	8.00478e-06
153	7.50049e-06
154	7.51485e-06
155	8.63114e-06
156	9.70012e-06
157	9.50247e-06
158	8.16248e-06
159	5.65673e-06
160	4.0758e-06
161	4.12212e-06
162	4.11874e-06
163	4.04969e-06
164	3.93122e-06
165	3.81019e-06
166	7.98609e-06
167	4.86623e-05
168	0.000145313
169	0.000252228
170	0.000288312
171	0.000280463
172	0.000220249
173	0.000128986
174	0.000115189
175	0.000163571
176	0.00028013
177	0.000485465
178	0.000705712
179	0.000876579
180	0.00101198
181	0.00107498
182	0.00108519
183	0.00104732
184	0.0011647
185	0.00133304
186	0.00148044
187	0.00148593
188	0.00136138
189	0.00135085
190	0.00143455
191	0.00157605
192	0.00174653
193	0.00185328
194	0.00194487
195	0.00200112
196	0.00200658
197	0.00199574
198	0.00199143
199	0.00198919
200	0.00198499
201	0.00196673
202	0.00191458
203	0.00186535
204	0.00185754
205	0.00180106
206	0.00175969
207	0.00173402
208	0.00170758
209	0.00169163
210	0.00168497
211	0.00167121
212	0.00162649
213	0.00158644
214	0.00157234
215	0.00154783
216	0.00152205
217	0.00149552
218	0.00146225
219	0.00140339
220	0.00138389
221	0.00135582
222	0.0013229
223	0.0012591
224	0.00118915
225	0.00112877
226	0.00107388
227	0.00102679
228	0.000980487
229	0.000925805
230	0.000868176
231	0.000785716
232	0.000695891
233	0.000627004
234	0.000561682
235	0.000502063
236	0.000459914
237	0.00042736
238	0.000413683
239	0.000394018
240	0.000395242
241	0.00041412
242	0.000416179
243	0.000418404
244	0.000430082
245	0.00044471
246	0.000460759
247	0.000468516
248	0.000472878
249	0.000466336
250	0.000446883
251	0.000441846
252	0.000440882
253	0.000445488
254	0.000440945
255	0.00044523
256	0.000462253
257	0.000484573
258	0.000560705
259	0.000593478
260	0.00054605
261	0.000480616
262	0.000435453
263	0.000412894
264	0.000395561
265	0.000428984
266	0.000494042
267	0.000504023
268	0.000487417
269	0.000554799
270	0.000695434
271	0.000668085
272	0.000650703
273	0.000689492
274	0.000678628
275	0.000691074
276	0.000715604
277	0.000783386
278	0.000676879
279	0.000505253
280	0.000400889
281	0.000342679
282	0.000325904
283	0.000318502
284	0.000355674
285	0.000387551
286	0.000373974
287	0.000510587
288	0.00061204
289	0.000524183
290	0.000616643
291	0.000809109
292	0.000960628
293	0.00121758
294	0.00147599
295	0.0017294
296	0.00181713
297	0.00189871
298	0.0019674
299	0.00197998
300	0.00189532
301	0.00181654
302	0.00189621
303	0.00186114
304	0.00177338
305	0.0017513
306	0.0016987
307	0.00159731
308	0.00159407
309	0.00167347
310	0.00161492
311	0.0016141
312	0.0016963
313	0.00166503
314	0.00164964
315	0.00168698
316	0.00168608
317	0.0016327
318	0.00157479
319	0.00162668
320	0.0017053
321	0.00175559
322	0.00177296
323	0.00176088
324	0.00166947
325	0.00152081
326	0.00139883
327	0.00134657
328	0.00134167
329	0.00145254
330	0.00157321
331	0.00162826
332	0.00164611
333	0.00169264
334	0.00170464
335	0.00168615
336	0.00169569
337	0.00172356
338	0.00174747
339	0.00177364
340	0.00178939
341	0.00175665
342	0.00172005
343	0.00171458
344	0.00170531
345	0.00167696
346	0.00167707
347	0.00170148
348	0.00172029
349	0.001699
350	0.00169234
351	0.00167107
352	0.00165216
353	0.00164938
354	0.00167172
355	0.0016857
356	0.00167547
357	0.00164093
358	0.0016159
359	0.00156956
360	0.00154714
361	0.00154171
362	0.00156711
363	0.00159995
364	0.00161235
365	0.00160876
366	0.00160264
367	0.00159401
368	0.0015826
369	0.00157644
370	0.00153981
371	0.00150836
372	0.00147605
373	0.00142704
374	0.00137126
375	0.00131588
376	0.00128982
377	0.00131673
378	0.00135203
379	0.00134155
380	0.00132684
381	0.0013211
382	0.00131488
383	0.00130984
384	0.00127286
385	0.00124388
386	0.00123262
387	0.00121813
388	0.00113592
389	0.00108723
390	0.00117223
391	0.00116055
392	0.00108537
393	0.000953209
394	0.000840696
395	0.000811804
396	0.000949
397	0.000992889
398	0.000939819
399	0.000942759
400	0.000973448
401	0.000961028
402	0.000944303
403	0.000910797
404	0.000872133
405	0.00084415
406	0.000815419
407	0.000758713
408	0.000648872
409	0.000555534
410	0.000518364
411	0.000480902
412	0.000556656
413	0.000625507
414	0.000647948
415	0.000657479
416	0.000660949
417	0.000665701
418	0.000664763
419	0.000659691
420	0.000655526
421	0.000638967
422	0.00061672
423	0.000606455
424	0.000582124
425	0.000540599
426	0.000528708
427	0.000538442
428	0.000542291
429	0.000554083
430	0.000579661
431	0.000584746
432	0.000571117
433	0.000565117
434	0.000551978
435	0.000542984
436	0.000539675
437	0.000518586
438	0.000512827
439	0.000630832
440	0.000910991
441	0.00106263
442	0.0010352
443	0.000966426
444	0.00105329
445	0.00101345
446	0.000882628
447	0.000708671
448	0.000669711
449	0.000671696
450	0.000699602
451	0.000684036
452	0.000577445
453	0.000483871
454	0.000443858
455	0.000426008
456	0.000445465
457	0.000502564
458	0.000526326
459	0.000572529
460	0.000591245
461	0.000571592
462	0.000526768
463	0.000514729
464	0.000587492
465	0.000572246
466	0.000500576
467	0.000476968
468	0.000445654
469	0.000395642
470	0.000384323
471	0.000408902
472	0.000454212
473	0.00048352
474	0.000505962
475	0.000535745
476	0.000539585
477	0.000536646
478	0.000536318
479	0.000512553
480	0.000493313
481	0.00048731
482	0.000486268
483	0.00047227
484	0.000426987
485	0.000368342
486	0.000340032
487	0.000344937
488	0.000370255
489	0.000402046
490	0.000428652
491	0.000450637
492	0.000460299
493	0.000456904
494	0.00044243
495	0.000412944
496	0.000354576
497	0.00030707
498	0.000297508
499	0.000286955
500	0.00027884
501	0.000286775
502	0.000319905
503	0.000380529
504	0.000463507
505	0.000591855
506	0.000623447
507	0.000566214
508	0.000552506
509	0.000517798
510	0.000511569
511	0.000608862
512	0.000716024
513	0.000688474
514	0.000682242
515	0.000768571
516	0.000822917
517	0.00077459
518	0.00082239
519	0.000938246
520	0.0010022
521	0.000985353
522	0.000905035
523	0.000814809
524	0.000809652
525	0.000753844
526	0.000765942
527	0.00079519
528	0.000780585
529	0.000793732
530	0.000818117
531	0.000829248
532	0.000883773
533	0.000891692
534	0.000982038
535	0.000986813
536	0.00087582
537	0.000777125
538	0.000744442
539	0.000720194
540	0.000673564
541	0.000651912
542	0.000716062
543	0.0007505
544	0.000781229
545	0.000799518
546	0.000794197
547	0.000697734
548	0.000534435
549	0.000426205
550	0.000400419
551	0.000453283
552	0.000552544
553	0.000586354
554	0.000610336
555	0.000689605
556	0.000735142
557	0.000753892
558	0.000724884
559	0.000755363
560	0.00079421
561	0.000838855
562	0.000845944
563	0.000849756
564	0.000840757
565	0.000791507
566	0.00079304
567	0.000841396
568	0.000891595
569	0.000874475
570	0.000801512
571	0.000739345
572	0.00073997
573	0.000715328
574	0.000720794
575	0.000756582
576	0.000747953
577	0.000720579
578	0.000697082
579	0.000744622
580	0.0008194
581	0.000859025
582	0.000857224
583	0.000847399
584	0.000822101
585	0.000795942
586	0.000798458
587	0.000818404
588	0.000792463
589	0.000793028
590	0.000837025
591	0.000852289
592	0.000837434
593	0.000777425
594	0.000731566
595	0.000725033
596	0.000735371
597	0.000753107
598	0.000789264
599	0.000807366
600	0.000798198
601	0.000773704
602	0.000729491
603	0.000698192
604	0.000715352
605	0.000760714
606	0.000777936
607	0.000776915
608	0.000773472
609	0.000757925
610	0.000726959
611	0.000716938
612	0.000720046
613	0.000731912
614	0.000736816
615	0.000739052
616	0.000749695
617	0.000748265
618	0.000742465
619	0.000723311
620	0.000707001
621	0.000707345
622	0.000696876
623	0.00066018
624	0.000644186
625	0.000680746
626	0.000712432
627	0.000725447
628	0.000742701
629	0.000751311
630	0.000748185
631	0.000749119
632	0.000767026
633	0.000784532
634	0.000783415
635	0.000784122
636	0.000784501
637	0.000777738
638	0.000759127
639	0.000749931
640	0.000753242
641	0.000752325
642	0.000753347
643	0.000753023
644	0.000743392
645	0.000721537
646	0.000719367
647	0.000725538
648	0.000727895
649	0.000725742
650	0.000724522
651	0.000724047
652	0.000723616
653	0.00072319
654	0.000722988
655	0.000720632
656	0.000716352
657	0.000713808
658	0.000711957
659	0.000708836
660	0.00070634
661	0.000702286
662	0.000692585
663	0.000681579
664	0.000670306
665	0.000659524
666	0.000653055
667	0.000647774
668	0.000641723
669	0.000634174
670	0.000625457
671	0.000616654
672	0.000609984
673	0.000603419
674	0.000596855
675	0.00058948
676	0.000582966
677	0.000577785
678	0.000574219
679	0.000571932
680	0.000569918
681	0.000567564
682	0.000564246
683	0.000560144
684	0.000555651
685	0.000551193
686	0.000545941
687	0.000538856
688	0.000530898
689	0.000524762
690	0.000519192
691	0.000511228
692	0.000499765
693	0.000488824
694	0.000472486
695	0.000444256
696	0.000413123
697	0.000387315
698	0.000364183
699	0.000343754
700	0.000341666
701	0.000340387
702	0.000336645
703	0.000335195
704	0.000335183
705	0.000327106
706	0.000317378
707	0.000321433
708	0.000334858
709	0.000369128
710	0.000404612
711	0.000430484
712	0.000485702
713	0.000522584
714	0.000525664
715	0.000525217
716	0.000559002
717	0.000566521
718	0.000566618
719	0.000571181
720	0.000573731
721	0.00055151
722	0.000526041
723	0.000516858
724	0.000503861
725	0.00049107
726	0.000492215
727	0.000514663
728	0.000540787
729	0.000552544
730	0.000553257
731	0.000548685
732	0.000539342
733	0.000519091
734	0.000481983
735	0.000450253
736	0.000429939
737	0.000411212
738	0.000396355
739	0.000387042
740	0.000381815
741	0.000372855
742	0.000359616
743	0.000347436
744	0.00033654
745	0.00032592
746	0.000315863
747	0.000309463
748	0.00029663
749	0.000282623
750	0.000272303
751	0.000262524
752	0.000257091
753	0.000255853
754	0.000258267
755	0.000264624
756	0.000277341
757	0.000296853
758	0.000318703
759	0.000337865
760	0.00034135
761	0.000334702
762	0.000335891
763	0.000347287
764	0.000345185
765	0.000331777
766	0.000327068
767	0.000335418
768	0.000347064
769	0.000354503
770	0.000362734
771	0.000371982
772	0.000376346
773	0.000385727
774	0.000410287
775	0.00042793
776	0.00043818
777	0.000447744
778	0.000462565
779	0.000473962
780	0.000467651
781	0.000456358
782	0.000464897
783	0.00047564
784	0.000472596
785	0.000474349
786	0.000502384
787	0.000525395
788	0.000530784
789	0.000537174
790	0.000546366
791	0.000552686
792	0.000551766
793	0.000558392
794	0.000569929
795	0.000574275
796	0.000567115
797	0.000566061
798	0.000569776
799	0.000565336
800	0.00056465
801	0.000571385
802	0.000574319
803	0.000577954
804	0.000581798
805	0.000582239
806	0.000582129
807	0.000582114
808	0.000581938
809	0.000581364
810	0.000580528
811	0.000575418
812	0.000569944
813	0.00056668
814	0.000564228
815	0.00056318
816	0.00056318
817	0.00056318
818	0.00056318
819	0.000563121
820	0.000562401
821	0.000560813
822	0.000559289
823	0.00055725
824	0.00055583
825	0.000554702
826	0.000554089
827	0.000553161
828	0.0005518
829	0.000549376
830	0.000547406
831	0.000545117
832	0.000542628
833	0.00053924
834	0.000536312
835	0.000533444
836	0.000531101
837	0.00052938
838	0.000527545
839	0.000526534
840	0.000524582
841	0.000522774
842	0.000521402
843	0.000520036
844	0.000517712
845	0.000514535
846	0.000510398
847	0.000505144
848	0.000501705
849	0.000500458
850	0.000498268
851	0.000494134
852	0.000490107
853	0.000488487
854	0.00048525
855	0.000479158
856	0.000472187
857	0.000469619
858	0.000469185
859	0.000467946
860	0.000466604
861	0.00046519
862	0.000463913
863	0.000461825
864	0.000455571
865	0.000451734
866	0.000450419
867	0.000447725
868	0.000447946
869	0.000446785
870	0.000440403
871	0.000432755
872	0.000432194
873	0.000421628
874	0.000403646
875	0.000397407
876	0.000394671
877	0.000383724
878	0.000372356
879	0.0003697
880	0.00036744
881	0.000360476
882	0.000358311
883	0.000359682
884	0.000361226
885	0.000361496
886	0.00035993
887	0.000355527
888	0.000343978
889	0.000346146
890	0.000346681
891	0.000345665
892	0.000343032
893	0.000335588
894	0.000331683
895	0.00033067
896	0.000326111
897	0.000321563
898	0.000315786
899	0.000306622
900	0.000305503
901	0.000303961
902	0.000302447
903	0.000301034
904	0.000297686
905	0.00029045
906	0.000285773
907	0.00028743
908	0.000294025
909	0.000297042
910	0.000296348
911	0.000287477
912	0.000282834
913	0.000277527
914	0.000284579
915	0.000289212
916	0.000292675
917	0.000296733
918	0.000299782
919	0.000300269
920	0.000300258
921	0.000299783
922	0.000298656
923	0.000296016
924	0.000291318
925	0.000286868
926	0.000276825
927	0.000268147
928	0.000264681
929	0.000271267
930	0.000277326
931	0.000279816
932	0.000277643
933	0.000274809
934	0.000275505
935	0.000279348
936	0.000284808
937	0.000282055
938	0.000276674
939	0.000274817
940	0.000277116
941	0.000279114
942	0.000277062
943	0.000275317
944	0.000273484
945	0.000271454
946	0.000268201
947	0.000265127
948	0.000265145
949	0.000266316
950	0.000267848
951	0.000269346
952	0.000269934
953	0.000270305
954	0.000271207
955	0.000272062
956	0.000272174
957	0.000272172
958	0.000272177
959	0.000272177
960	0.000271456
961	0.000268949
962	0.000265859
963	0.000263455
964	0.000262472
965	0.000262473
966	0.000262473
967	0.000262473
968	0.000262473
969	0.000262473
970	0.000262471
971	0.000262324
972	0.000261734
973	0.000261232
974	0.000260424
975	0.000258756
976	0.000257576
977	0.000257072
978	0.000257044
979	0.000256818
980	0.000256213
981	0.000255089
982	0.000251959
983	0.000249048
984	0.000248084
985	0.000247986
986	0.000246958
987	0.000247356
988	0.000248197
989	0.000248622
990	0.000251796
991	0.00025827
992	0.000269212
993	0.000287115
994	0.000295869
995	0.000291126
996	0.000281581
997	0.000281222
998	0.000277635
999	0.000273062
1000	0.000268207
1001	0.00027068
1002	0.000278529
1003	0.000285629
1004	0.000285541
1005	0.000278014
1006	0.000266009
1007	0.00025007
1008	0.000238097
1009	0.000226835
1010	0.000224562
1011	0.000215757
1012	0.000210891
1013	0.000220522
1014	0.000232497
1015	0.000247461
1016	0.000259505
1017	0.000260167
1018	0.000265015
1019	0.00026822
1020	0.000270185
1021	0.000270898
1022	0.000276682
1023	0.000282376
1024	0.000284019
1025	0.000285367
1026	0.000283821
1027	0.000280701
1028	0.000279203
1029	0.00028116
1030	0.000286217
1031	0.000293876
1032	0.000296874
1033	0.000294895
1034	0.000305475
1035	0.000320868
1036	0.000332716
1037	0.000336437
1038	0.000341644
1039	0.00034328
1040	0.000344476
1041	0.000349481
1042	0.00035066
1043	0.000350889
1044	0.000350788
1045	0.000350661
1046	0.000350656
1047	0.000350622
1048	0.000350594
1049	0.000350572
1050	0.000350504
1051	0.000350499
1052	0.000350321
1053	0.000350093
1054	0.000349996
1055	0.000349583
1056	0.000349142
1057	0.000348675
1058	0.00034816
1059	0.00034767
1060	0.000346039
1061	0.000345037
1062	0.000344354
1063	0.000343694
1064	0.000343177
1065	0.000342682
1066	0.000342367
1067	0.000341389
1068	0.000340658
1069	0.000339688
1070	0.000337798
1071	0.000335879
1072	0.000335689
1073	0.000335565
1074	0.000335075
1075	0.000334322
1076	0.000334075
1077	0.000333559
1078	0.000331835
1079	0.000329899
1080	0.000329097
1081	0.000329092
1082	0.000329092
1083	0.000328908
1084	0.000328584
1085	0.000328393
1086	0.000328103
1087	0.000327378
1088	0.000327265
1089	0.00032726
1090	0.00032698
1091	0.000326372
1092	0.00032582
1093	0.000325683
1094	0.000325578
1095	0.000324368
1096	0.000323649
1097	0.000323579
1098	0.000323342
1099	0.000323301
1100	0.000322949
1101	0.000322628
1102	0.000322128
1103	0.000320874
1104	0.000319953
1105	0.00031933
1106	0.000319239
1107	0.000318783
1108	0.000317664
1109	0.000316764
1110	0.000316211
1111	0.00031585
1112	0.00031506
1113	0.000314464
1114	0.0003134
1115	0.000311198
1116	0.000305824
1117	0.000298603
1118	0.000301235
1119	0.000300637
1120	0.000298721
1121	0.000296495
1122	0.000295445
1123	0.000295371
1124	0.000294839
1125	0.000293999
1126	0.000292853
1127	0.000292386
1128	0.000292026
1129	0.000290976
1130	0.000289112
1131	0.000287901
1132	0.000286911
1133	0.000285911
1134	0.000284982
1135	0.000284547
1136	0.000283638
1137	0.000282433
1138	0.000280968
1139	0.000280472
1140	0.000280119
1141	0.000279213
1142	0.000277947
1143	0.000276676
1144	0.000273898
1145	0.000271445
1146	0.000270119
1147	0.000267445
1148	0.000266535
1149	0.00026643
1150	0.000266074
1151	0.000265514
1152	0.000264744
1153	0.000263852
1154	0.000263158
1155	0.000262669
1156	0.000261505
1157	0.000259419
1158	0.000256896
1159	0.000255239
1160	0.000252977
1161	0.000251809
1162	0.000251606
1163	0.000251137
1164	0.000249586
1165	0.00024717
1166	0.000244297
1167	0.000242743
1168	0.000242094
1169	0.000241185
1170	0.000240037
1171	0.000238674
1172	0.00023713
1173	0.000235724
1174	0.000233928
1175	0.000231143
1176	0.00022876
1177	0.000227319
1178	0.000225997
1179	0.000223909
1180	0.000221721
1181	0.000219631
1182	0.000217603
1183	0.000217603
1184	0.000216752
1185	0.00021592
1186	0.000210836
1187	0.000207128
1188	0.000205302
1189	0.000205775
1190	0.000210621
1191	0.000209186
1192	0.000210312
1193	0.000209153
1194	0.000209659
1195	0.00021037
1196	0.000212853
1197	0.000214872
1198	0.000218762
1199	0.000215796
1200	0.000214262
1201	0.000219869
1202	0.000222904
1203	0.0002188
1204	0.000207878
1205	0.000197277
1206	0.000191678
1207	0.000181623
1208	0.000170636
1209	0.00017751
1210	0.000182636
1211	0.000184912
1212	0.000187249
1213	0.000179508
1214	0.000173783
1215	0.000174881
1216	0.000175189
1217	0.00017491
1218	0.000176793
1219	0.000183703
1220	0.000195443
1221	0.000205239
1222	0.000203364
1223	0.000196052
1224	0.000180983
1225	0.000177885
1226	0.000147674
1227	0.0001525
1228	0.000155519
1229	0.000159709
1230	0.000148709
1231	0.000119453
1232	9.7249e-05
1233	8.62066e-05
1234	7.78825e-05
1235	7.80861e-05
1236	9.59556e-05
1237	0.000121001
1238	0.000146941
1239	0.000160422
1240	0.000180799
1241	0.000199968
1242	0.0002087
1243	0.000216622
1244	0.000232523
1245	0.000242258
1246	0.000244304
1247	0.000249243
1248	0.000260958
1249	0.000273204
1250	0.000282195
1251	0.000290011
1252	0.000295516
1253	0.000297216
1254	0.000297247
1255	0.000297376
1256	0.000297391
1257	0.000297356
1258	0.000297266
1259	0.000297118
1260	0.000296621
1261	0.000295533
1262	0.000291241
1263	0.000286127
1264	0.00028127
1265	0.000277571
1266	0.000274774
1267	0.00027098
1268	0.000262273
1269	0.000255574
1270	0.000249028
1271	0.000242058
1272	0.00023635
1273	0.000232311
1274	0.000230597
1275	0.000228899
1276	0.000226443
1277	0.000210146
1278	0.000196518
1279	0.000183605
1280	0.000175087
1281	0.000163765
1282	0.000144173
1283	0.00012837
1284	0.000112572
1285	9.90166e-05
1286	9.00441e-05
1287	8.60188e-05
1288	8.44258e-05
1289	8.40429e-05
1290	8.23745e-05
1291	8.03275e-05
1292	7.76955e-05
1293	7.49377e-05
1294	7.55083e-05
1295	7.30578e-05
1296	6.71023e-05
1297	6.81189e-05
1298	8.20917e-05
1299	8.58354e-05
1300	8.96197e-05
1301	8.68857e-05
1302	8.22158e-05
1303	9.38862e-05
1304	0.000107163
1305	0.000103803
1306	0.000105429
1307	0.000110858
1308	0.000110345
1309	0.000108965
1310	0.000107632
1311	0.000102997
1312	9.58571e-05
1313	9.54398e-05
1314	9.5807e-05
1315	9.68714e-05
1316	9.78004e-05
1317	0.000101762
1318	0.000109826
1319	0.00011188
1320	0.000110723
1321	0.000112968
1322	0.000108922
1323	9.81223e-05
1324	8.61176e-05
1325	8.19881e-05
1326	8.33188e-05
1327	9.21698e-05
1328	0.000108265
1329	0.000103717
1330	8.51385e-05
1331	7.28531e-05
1332	6.5067e-05
1333	6.11706e-05
1334	5.80377e-05
1335	5.41157e-05
1336	5.05554e-05
1337	4.72512e-05
1338	4.1388e-05
1339	3.63463e-05
1340	3.1155e-05
1341	2.6883e-05
1342	2.54263e-05
1343	2.60477e-05
1344	2.42941e-05
1345	2.13147e-05
1346	1.9227e-05
1347	1.63656e-05
1348	1.39211e-05
1349	1.18709e-05
1350	9.46197e-06
1351	7.91938e-06
1352	7.50454e-06
1353	7.4957e-06
1354	7.96414e-06
1355	8.14823e-06
1356	7.5536e-06
1357	6.93789e-06
1358	6.40683e-06
1359	6.05178e-06
1360	5.75401e-06
1361	5.97051e-06
1362	6.83494e-06
1363	8.54976e-06
1364	1.03293e-05
1365	1.13637e-05
1366	1.34841e-05
1367	1.76617e-05
1368	1.79844e-05
1369	1.42237e-05
1370	1.02734e-05
1371	9.61973e-06
1372	1.32012e-05
1373	1.90441e-05
1374	3.1283e-05
1375	3.92631e-05
1376	2.66778e-05
1377	1.99884e-05
1378	1.94683e-05
1379	1.77349e-05
1380	1.45736e-05
1381	1.45487e-05
1382	1.37366e-05
1383	1.19953e-05
1384	1.01665e-05
1385	8.58045e-06
1386	7.74873e-06
1387	7.47954e-06
1388	7.51128e-06
1389	5.78922e-06
1390	5.61828e-06
1391	5.52616e-06
1392	5.34156e-06
1393	5.32952e-06
1394	5.32952e-06
1395	5.33908e-06
1396	5.48213e-06
1397	5.63214e-06
1398	5.9993e-06
1399	6.44985e-06
1400	6.55248e-06
1401	6.41275e-06
1402	6.31117e-06
1403	6.29481e-06
1404	6.17879e-06
1405	5.47816e-06
1406	5.02549e-06
1407	5.36329e-06
1408	7.57452e-06
1409	1.00039e-05
1410	9.58197e-06
1411	9.39921e-06
1412	1.24881e-05
1413	1.89663e-05
1414	2.51774e-05
1415	2.80276e-05
1416	3.40407e-05
1417	3.88764e-05
1418	4.63609e-05
1419	6.05058e-05
1420	8.08274e-05
1421	9.73224e-05
1422	0.000107031
1423	0.000109475
1424	0.000103345
1425	9.48746e-05
1426	9.35591e-05
1427	0.000102837
1428	0.000119483
1429	0.000130091
1430	0.00013718
1431	0.000140315
1432	0.000136897
1433	0.000135846
1434	0.000141076
1435	0.000144491
1436	0.000145872
1437	0.000146102
1438	0.000146231
1439	0.000146279
1440	0.00014671
1441	0.000149005
1442	0.000152127
1443	0.00015477
1444	0.000155081
1445	0.000155374
1446	0.000155035
1447	0.000154915
1448	0.000154099
1449	0.000152351
1450	0.000151416
1451	0.00015178
1452	0.00015236
1453	0.000152473
1454	0.000151288
1455	0.000150398
1456	0.000149995
1457	0.00014919
1458	0.000147899
1459	0.000145831
1460	0.000143766
1461	0.000141698
1462	0.000138737
1463	0.000137764
1464	0.000139126
1465	0.000139356
1466	0.000138584
1467	0.000139163
1468	0.000141306
1469	0.000143764
1470	0.000144686
1471	0.000144514
1472	0.000144317
1473	0.000145857
1474	0.000148491
1475	0.000149228
1476	0.00014673
1477	0.000143301
1478	0.00013999
1479	0.000137814
1480	0.000135842
1481	0.000136352
1482	0.000137672
1483	0.000140051
1484	0.000141182
1485	0.000140727
1486	0.000139679
1487	0.000138879
1488	0.000137694
1489	0.000136963
1490	0.000137173
1491	0.00013756
1492	0.000137789
1493	0.000137867
1494	0.000138042
1495	0.000138136
1496	0.000139326
1497	0.000141381
1498	0.000142516
1499	0.000142231
1500	0.000141479
1501	0.000140846
1502	0.000139986
1503	0.000139188
1504	0.00013855
1505	0.000138908
1506	0.000140715
1507	0.000143227
1508	0.000144707
1509	0.000144786
1510	0.00014452
1511	0.000144193
1512	0.000143757
1513	0.000143082
1514	0.000142545
1515	0.000141693
1516	0.000141188
1517	0.000141086
1518	0.000140896
1519	0.000140779
1520	0.000140776
1521	0.000140778
1522	0.000140837
1523	0.000140697
1524	0.000140236
1525	0.000139754
1526	0.000139428
1527	0.000139305
1528	0.000139295
1529	0.000139242
1530	0.000139253
1531	0.000139305
1532	0.000139367
1533	0.000139711
1534	0.000140806
1535	0.00014174
1536	0.000142127
1537	0.000142222
1538	0.0001421
1539	0.000139554
1540	0.000136469
1541	0.00013576
1542	0.000137641
1543	0.00014092
1544	0.000143004
1545	0.00014301
1546	0.000141962
1547	0.000139991
1548	0.000137696
1549	0.000135633
1550	0.000134087
1551	0.000131398
1552	0.000128328
1553	0.00012474
1554	0.000123059
1555	0.000122354
1556	0.000124152
1557	0.000126088
1558	0.000128332
1559	0.000130404
1560	0.000129443
1561	0.000126964
1562	0.000123201
1563	0.000118643
1564	0.000116001
1565	0.000114956
1566	0.000116469
1567	0.000120424
1568	0.000125609
1569	0.000125728
1570	0.000124954
1571	0.000122274
1572	0.000120952
1573	0.000121112
1574	0.000122614
1575	0.000125687
1576	0.000129701
1577	0.000130695
1578	0.000127773
1579	0.00012288
1580	0.000118136
1581	9.22104e-05
1582	0.000146892
1583	0.000103215
1584	0.000120074
1585	0.000121262
1586	0.000115367
1587	0.000115869
1588	0.000101451
1589	0.000102244
1590	8.78479e-05
1591	8.44044e-05
1592	9.24432e-05
1593	9.43879e-05
1594	9.94397e-05
1595	9.82263e-05
1596	9.77568e-05
1597	9.46469e-05
1598	8.29075e-05
1599	8.74363e-05
1600	8.09175e-05
1601	8.48371e-05
1602	7.53564e-05
1603	7.76175e-05
1604	7.30956e-05
1605	7.19025e-05
1606	6.66471e-05
1607	7.23624e-05
1608	6.40295e-05
1609	5.97267e-05
1610	4.84439e-05
1611	4.06798e-05
1612	3.12633e-05
1613	2.72229e-05
1614	2.49883e-05
1615	3.05539e-05
1616	3.97865e-05
1617	5.09501e-05
1618	4.82165e-05
1619	4.50324e-05
1620	3.7922e-05
1621	3.42855e-05
1622	3.05138e-05
1623	2.7479e-05
1624	2.37466e-05
1625	1.9548e-05
1626	1.82098e-05
1627	1.9077e-05
1628	2.04656e-05
1629	2.00967e-05
1630	1.7166e-05
1631	1.73152e-05
1632	2.12918e-05
1633	2.42422e-05
1634	2.45893e-05
1635	2.12303e-05
1636	1.83255e-05
1637	1.33764e-05
1638	9.82999e-06
1639	6.97298e-06
1640	6.42443e-06
1641	8.92653e-06
1642	1.35573e-05
1643	1.87125e-05
1644	2.18312e-05
1645	2.02501e-05
1646	1.78134e-05
1647	1.52379e-05
1648	1.26848e-05
1649	9.75051e-06
1650	7.06692e-06
1651	4.46294e-06
1652	3.06647e-06
1653	2.43081e-06
1654	3.06446e-06
1655	6.42467e-06
1656	1.19483e-05
1657	1.69902e-05
1658	1.85889e-05
1659	1.75723e-05
1660	1.62749e-05
1661	1.61206e-05
1662	1.47965e-05
1663	1.22406e-05
1664	9.45885e-06
1665	7.761e-06
1666	7.66536e-06
1667	7.67144e-06
1668	8.59142e-06
1669	9.57634e-06
1670	1.05473e-05
1671	1.01234e-05
1672	9.25458e-06
1673	7.25779e-06
1674	5.49049e-06
1675	3.80124e-06
1676	3.92752e-06
1677	5.72422e-06
1678	8.32447e-06
1679	9.23421e-06
1680	7.82997e-06
1681	5.30691e-06
1682	3.08654e-06
1683	2.75205e-06
1684	2.99037e-06
1685	4.00467e-06
1686	5.08175e-06
1687	4.96782e-06
1688	4.10606e-06
1689	3.8057e-06
1690	3.07859e-06
1691	2.33493e-06
1692	1.3214e-06
1693	2.08295e-07
1694	2.04075e-07
1695	2.00796e-07
1696	1.98355e-07
1697	1.95955e-07
1698	1.93196e-07
1699	1.90854e-07
1700	1.9086e-07
1701	2.11449e-07
1702	9.20678e-07
1703	2.27914e-06
1704	3.57132e-06
1705	3.68832e-06
1706	4.75088e-06
1707	9.56709e-06
1708	1.74166e-05
1709	1.68664e-05
1710	1.064e-05
1711	3.87235e-06
1712	2.43184e-07
1713	2.63474e-07
1714	2.13478e-07
1715	2.48106e-06
1716	2.41018e-06
1717	1.65343e-06
1718	2.10297e-07
1719	2.01674e-07
1720	1.48135e-07
1721	1.85987e-07
1722	2.28869e-07
1723	8.04456e-07
1724	1.23182e-06
1725	1.08117e-06
1726	5.8981e-07
1727	2.08768e-06
1728	3.29758e-06
1729	5.34177e-06
1730	3.81424e-06
1731	2.31603e-07
1732	2.32327e-07
1733	2.39262e-07
1734	2.41204e-07
1735	2.41753e-07
1736	2.41795e-07
1737	2.41848e-07
1738	2.43941e-07
1739	1.27599e-06
1740	1.03612e-06
1741	2.44432e-07
1742	2.52931e-07
1743	2.49783e-07
1744	2.49389e-07
1745	2.50812e-07
1746	2.53828e-07
1747	2.58322e-07
1748	2.83617e-07
1749	4.90147e-07
1750	1.15833e-06
1751	1.61585e-06
1752	2.71134e-06
1753	2.88202e-06
1754	3.03461e-06
1755	2.56834e-06
1756	2.19149e-06
1757	1.91959e-06
1758	1.30614e-06
1759	7.64126e-07
1760	3.67275e-07
1761	2.4336e-07
1762	2.601e-07
1763	2.63583e-07
1764	3.26221e-07
1765	2.52308e-07
1766	2.48955e-07
1767	2.46014e-07
1768	2.13738e-07
1769	1.7055e-07
1770	1.60588e-07
1771	1.62569e-07
1772	1.6666e-07
1773	3.51514e-07
1774	4.49994e-06
1775	8.12902e-06
1776	9.07995e-06
1777	5.64723e-06
1778	8.55043e-07
1779	2.59261e-07
1780	2.64277e-07
1781	2.09407e-07
1782	1.93685e-07
1783	1.87607e-07
1784	1.60928e-07
1785	2.37786e-06
1786	1.67886e-06
1787	1.9837e-06
1788	1.67398e-06
1789	1.6844e-05
1790	2.87132e-05
1791	1.99801e-05
1792	7.8438e-06
1793	7.52999e-06
1794	1.10646e-05
1795	6.38145e-06
1796	1.39251e-06
1797	3.51655e-07
1798	1.85467e-06
1799	3.13355e-06
1800	6.16219e-06
1801	1.62862e-05
1802	1.07027e-05
1803	4.46214e-07
1804	3.96406e-07
1805	3.7235e-07
1806	3.55725e-07
1807	3.55355e-07
1808	3.57668e-07
1809	3.52152e-06
1810	1.33316e-05
1811	2.24851e-05
1812	2.61199e-05
1813	2.38486e-05
1814	1.7443e-05
1815	1.34326e-05
1816	1.0501e-05
1817	9.90758e-06
1818	9.31314e-06
1819	8.8259e-06
1820	1.15444e-05
1821	2.13338e-05
1822	2.90456e-05
1823	3.25631e-05
1824	3.64382e-05
1825	4.12572e-05
1826	4.70239e-05
1827	4.88304e-05
1828	5.55085e-05
1829	7.56653e-05
1830	8.02747e-05
1831	6.67385e-05
1832	5.41349e-05
1833	4.13082e-05
1834	3.72976e-05
1835	4.13821e-05
1836	5.6489e-05
1837	6.30809e-05
1838	3.89607e-05
1839	1.81823e-05
1840	9.60275e-06
1841	7.04253e-06
1842	1.12057e-05
1843	2.07308e-05
1844	3.57177e-05
1845	4.79906e-05
1846	5.19996e-05
1847	5.06322e-05
1848	4.24632e-05
1849	3.56398e-05
1850	3.12049e-05
1851	2.79569e-05
1852	2.56369e-05
1853	2.30407e-05
1854	2.16096e-05
1855	1.96982e-05
1856	1.57168e-05
1857	1.23082e-05
1858	9.97901e-06
1859	1.13093e-05
1860	1.53608e-05
1861	2.23468e-05
1862	2.76355e-05
1863	3.48625e-05
1864	5.00796e-05
1865	5.8604e-05
1866	4.82193e-05
1867	4.57498e-05
1868	3.90704e-05
1869	6.0971e-05
1870	9.53139e-05
1871	0.000126783
1872	0.00011342
1873	0.000149893
1874	0.000151655
1875	0.000152378
1876	0.000152471
1877	0.000152599
1878	0.000152587
1879	0.000152281
1880	0.000140993
1881	9.63871e-05
1882	7.44303e-05
1883	5.91674e-05
1884	5.71335e-05
1885	5.30373e-05
1886	5.69161e-05
1887	8.80193e-05
1888	9.73746e-05
1889	0.000108647
1890	0.000108874
1891	0.000104036
1892	0.000100348
1893	0.000109453
1894	0.000116385
1895	0.000117486
1896	0.000117195
1897	0.000119277
1898	0.000121295
1899	0.000123818
1900	0.000119762
1901	0.000115963
1902	0.000123729
1903	0.000127523
1904	0.000121911
1905	0.000118154
1906	0.00011875
1907	0.000114097
1908	0.0001086
1909	9.69193e-05
1910	8.0999e-05
1911	7.03016e-05
1912	6.4823e-05
1913	6.14101e-05
1914	6.43978e-05
1915	7.29435e-05
1916	7.94681e-05
1917	8.43709e-05
1918	8.96389e-05
1919	9.51923e-05
1920	0.000101186
1921	0.000102771
1922	0.000101656
1923	9.96906e-05
1924	9.78979e-05
1925	0.000103789
1926	0.000111536
1927	0.000110158
1928	0.000115182
1929	0.000109752
1930	8.99538e-05
1931	7.7422e-05
1932	7.70194e-05
1933	8.6726e-05
1934	8.26307e-05
1935	7.86384e-05
1936	8.26501e-05
1937	7.58736e-05
1938	7.51525e-05
1939	8.71965e-05
1940	9.42818e-05
1941	0.00010016
1942	0.000104835
1943	0.000102588
1944	9.91108e-05
1945	9.57383e-05
1946	8.87737e-05
1947	7.93548e-05
1948	7.36564e-05
1949	7.15292e-05
1950	7.04893e-05
1951	7.0114e-05
1952	7.18551e-05
1953	8.0819e-05
1954	8.86e-05
1955	9.79175e-05
1956	0.000100128
1957	0.000100356
1958	0.000101786
1959	0.000103297
1960	0.000101919
1961	9.61753e-05
1962	8.40547e-05
1963	7.46146e-05
1964	7.69622e-05
1965	8.10995e-05
1966	8.75381e-05
1967	9.4937e-05
1968	0.000104751
1969	0.00011019
1970	0.000112713
1971	0.000112749
1972	0.000114512
1973	0.000113407
1974	0.000110694
1975	0.000106363
1976	9.48767e-05
1977	9.62911e-05
1978	0.000108091
1979	0.000117683
1980	0.00012108
1981	0.000120541
1982	0.000121652
1983	0.000121962
1984	0.000122001
1985	0.00012211
1986	0.000119716
1987	0.000110371
1988	0.00010083
1989	9.96002e-05
1990	0.000101149
1991	0.00010831
1992	0.000110255
1993	0.000111268
1994	0.00011249
1995	0.000110533
1996	0.000110578
1997	0.000109357
1998	0.000106531
[truncated: 8,969 more rows]

## Sheet: spring329
hours	concentration
0	0
1	0
2	1.58327e-29
3	7.15294e-23
4	7.34115e-23
5	8.0994e-23
6	1.28176e-17
7	6.94525e-16
8	1.75598e-15
9	3.18434e-15
10	3.93048e-15
11	4.19186e-15
12	4.82121e-15
13	6.06905e-15
14	8.01176e-15
15	9.79045e-15
16	1.07867e-14
17	8.96435e-15
18	5.2258e-15
19	2.53403e-15
20	7.32621e-16
21	1.23257e-16
22	1.82977e-17
23	1.24663e-17
24	8.85249e-18
25	1.32769e-17
26	1.5821e-17
27	1.1936e-17
28	4.07141e-18
29	6.11545e-19
30	7.56501e-19
31	2.28226e-18
32	5.56564e-18
33	2.88055e-18
34	4.73033e-18
35	1.70183e-17
36	8.84847e-17
37	1.3511e-14
38	7.30157e-14
39	3.40942e-13
40	6.38134e-13
41	9.68229e-14
42	1.35981e-13
43	1.46082e-13
44	1.4581e-13
45	7.97209e-07
46	2.40559e-06
47	1.35627e-06
48	1.21333e-07
49	1.44159e-10
50	1.69031e-08
51	5.50392e-07
52	2.74831e-06
53	3.73152e-06
54	3.17483e-06
55	3.04205e-06
56	3.35499e-06
57	3.1523e-06
58	2.62209e-06
59	2.19287e-06
60	1.84356e-06
61	1.53379e-06
62	1.90536e-06
63	4.32729e-06
64	5.05987e-06
65	3.36988e-06
66	1.53354e-06
67	6.74331e-07
68	4.91553e-07
69	4.27264e-07
70	3.72088e-07
71	3.23063e-07
72	2.9014e-07
73	2.55017e-07
74	2.13807e-07
75	1.79187e-07
76	1.58367e-07
77	2.41753e-07
78	1.16778e-07
79	1.02454e-07
80	9.05091e-08
81	8.95753e-08
82	9.19082e-08
83	4.34882e-07
84	1.16039e-06
85	1.40771e-06
86	1.27579e-06
87	1.41766e-06
88	1.5191e-06
89	1.35693e-06
90	8.05234e-07
91	2.38686e-07
92	6.84861e-08
93	6.63738e-08
94	5.04612e-07
95	3.56404e-06
96	4.23667e-06
97	1.56026e-06
98	4.79106e-07
99	5.12542e-07
100	6.66521e-07
101	9.4711e-07
102	2.07184e-06
103	4.44863e-06
104	4.17386e-06
105	3.8918e-06
106	4.02828e-06
107	4.4401e-06
108	5.65117e-06
109	7.19963e-06
110	4.71266e-06
111	2.74311e-06
112	3.09882e-06
113	5.75539e-06
114	6.62956e-06
115	6.21975e-06
116	6.3189e-06
117	7.67334e-06
118	1.23122e-05
119	1.79641e-05
120	2.15628e-05
121	2.33298e-05
122	2.48343e-05
123	2.55173e-05
124	2.5382e-05
125	2.41949e-05
126	2.17177e-05
127	1.93866e-05
128	1.76704e-05
129	1.64187e-05
130	1.60207e-05
131	1.75929e-05
132	2.30628e-05
133	3.07406e-05
134	3.74818e-05
135	4.1516e-05
136	4.36423e-05
137	4.01387e-05
138	2.89629e-05
139	1.38958e-05
140	7.11413e-06
141	5.02997e-06
142	3.73747e-06
143	3.43213e-06
144	3.81186e-06
145	4.2906e-06
146	4.72308e-06
147	4.61558e-06
148	4.21076e-06
149	4.0045e-06
150	4.19451e-06
151	4.38023e-06
152	3.9668e-06
153	2.97412e-06
154	1.96744e-06
155	1.39792e-06
156	1.15361e-06
157	1.0749e-06
158	1.10797e-06
159	1.16995e-06
160	1.20274e-06
161	1.10338e-06
162	9.78195e-07
163	9.98129e-07
164	1.23201e-06
165	1.75733e-06
166	2.66862e-06
167	4.20162e-06
168	6.23584e-06
169	7.78214e-06
170	8.26826e-06
171	7.89867e-06
172	7.0026e-06
173	6.22903e-06
174	6.24983e-06
175	7.04899e-06
176	7.78916e-06
177	8.74672e-06
178	1.16109e-05
179	1.74932e-05
180	2.11413e-05
181	1.77718e-05
182	1.41385e-05
183	1.26799e-05
184	1.19412e-05
185	1.2131e-05
186	1.26467e-05
187	1.3356e-05
188	1.57087e-05
189	1.83254e-05
190	1.96447e-05
191	1.94237e-05
192	1.86755e-05
193	1.86975e-05
194	2.03089e-05
195	2.27205e-05
196	2.69884e-05
197	3.16769e-05
198	2.71654e-05
199	2.0931e-05
200	1.89336e-05
201	1.71763e-05
202	1.61804e-05
203	1.58445e-05
204	1.63661e-05
205	1.8388e-05
206	2.43488e-05
207	3.63937e-05
208	4.91857e-05
209	5.66506e-05
210	5.57749e-05
211	4.92618e-05
212	3.9309e-05
213	2.68427e-05
214	1.55361e-05
215	1.05217e-05
216	8.93632e-06
217	8.9703e-06
218	1.06413e-05
219	1.98598e-05
220	2.62486e-05
221	2.70301e-05
222	2.5713e-05
223	2.41294e-05
224	2.31564e-05
225	2.28419e-05
226	2.25059e-05
227	2.221e-05
228	2.20136e-05
229	2.17388e-05
230	2.13737e-05
231	2.10753e-05
232	2.09935e-05
233	2.04997e-05
234	1.89873e-05
235	1.81074e-05
236	2.02939e-05
237	3.14569e-05
238	3.16785e-05
239	2.95924e-05
240	2.87938e-05
241	1.682e-05
242	1.86507e-05
243	2.28065e-05
244	2.48096e-05
245	2.55822e-05
246	2.56885e-05
247	2.74941e-05
248	3.01563e-05
249	3.09447e-05
250	2.86419e-05
251	2.60864e-05
252	2.57084e-05
253	2.66342e-05
254	2.91014e-05
255	3.13227e-05
256	3.17392e-05
257	2.57291e-05
258	1.88169e-05
259	1.55062e-05
260	1.39916e-05
261	1.49765e-05
262	2.31645e-05
263	2.90524e-05
264	2.93713e-05
265	3.136e-05
266	3.93964e-05
267	4.71209e-05
268	5.05218e-05
269	5.02935e-05
270	4.76305e-05
271	4.36942e-05
272	4.5204e-05
273	4.6601e-05
274	4.24796e-05
275	3.72377e-05
276	3.51664e-05
277	3.61235e-05
278	4.51063e-05
279	7.3572e-05
280	8.69872e-05
281	6.97669e-05
282	4.93266e-05
283	3.63783e-05
284	3.23943e-05
285	4.05678e-05
286	6.54666e-05
287	9.70206e-05
288	0.000113873
289	0.000122591
290	0.00012633
291	0.000118524
292	9.31765e-05
293	6.0298e-05
294	3.2923e-05
295	1.44807e-05
296	6.00256e-06
297	2.92932e-06
298	2.20066e-06
299	2.23089e-06
300	2.80634e-06
301	6.10388e-06
302	1.6573e-05
303	3.36542e-05
304	4.46945e-05
305	3.75497e-05
306	1.99633e-05
307	6.38287e-06
308	1.24466e-06
309	9.64654e-07
310	9.53503e-07
311	8.54421e-07
312	7.75905e-07
313	8.03056e-07
314	8.68581e-07
315	9.27213e-07
316	1.09537e-06
317	2.02335e-06
318	3.34901e-06
319	4.23032e-06
320	3.82409e-06
321	2.47636e-06
322	1.71865e-06
323	1.27301e-06
324	9.96732e-07
325	1.03005e-06
326	1.43234e-06
327	2.38765e-06
328	4.05207e-06
329	6.52472e-06
330	9.76229e-06
331	1.2371e-05
332	1.34954e-05
333	1.36119e-05
334	1.31255e-05
335	1.27625e-05
336	1.29086e-05
337	1.39572e-05
338	1.59407e-05
339	2.10513e-05
340	3.26414e-05
341	4.5803e-05
342	5.56245e-05
343	5.95385e-05
344	5.86022e-05
345	5.35317e-05
346	4.97828e-05
347	4.65086e-05
348	4.34781e-05
349	4.10599e-05
350	4.11507e-05
351	4.34268e-05
352	4.74338e-05
353	5.45797e-05
354	6.24484e-05
355	6.48689e-05
356	6.09822e-05
357	5.53814e-05
358	5.00203e-05
359	4.3331e-05
360	3.76744e-05
361	3.7693e-05
362	5.00792e-05
363	7.24307e-05
364	7.50738e-05
365	6.84921e-05
366	6.03682e-05
367	5.35077e-05
368	4.96841e-05
369	4.93907e-05
370	5.26121e-05
371	6.01842e-05
372	7.57522e-05
373	0.00010495
374	0.000137125
375	0.000145964
376	0.000115188
377	5.78116e-05
378	3.62784e-05
379	2.7208e-05
380	2.45282e-05
381	2.54899e-05
382	3.41833e-05
383	5.69542e-05
384	6.94499e-05
385	7.01877e-05
386	6.89842e-05
387	6.74364e-05
388	6.60812e-05
389	6.60972e-05
390	6.73138e-05
391	7.05035e-05
392	7.41976e-05
393	7.6654e-05
394	7.65376e-05
395	7.38683e-05
396	6.81175e-05
397	5.85809e-05
398	5.11242e-05
399	4.74657e-05
400	4.77921e-05
401	5.0028e-05
402	5.07622e-05
403	5.01326e-05
404	4.91968e-05
405	4.87436e-05
406	4.84539e-05
407	4.6411e-05
408	4.10055e-05
409	3.67372e-05
410	3.81535e-05
411	4.50829e-05
412	5.28131e-05
413	5.93428e-05
414	6.29968e-05
415	6.11071e-05
416	5.19231e-05
417	3.86442e-05
418	3.27505e-05
419	3.45828e-05
420	4.16291e-05
421	5.04297e-05
422	5.75949e-05
423	5.80218e-05
424	4.76658e-05
425	3.16751e-05
426	2.02819e-05
427	1.63875e-05
428	1.58833e-05
429	1.60774e-05
430	1.95638e-05
431	4.49287e-05
432	8.52564e-05
433	9.49447e-05
434	9.49726e-05
435	9.41623e-05
436	9.23361e-05
437	9.21654e-05
438	9.1692e-05
439	9.38439e-05
440	9.73909e-05
441	0.000100196
442	9.59542e-05
443	8.2438e-05
444	6.92657e-05
445	6.29677e-05
446	6.22887e-05
447	5.84741e-05
448	5.07377e-05
449	4.55007e-05
450	4.94031e-05
451	6.62097e-05
452	0.00010112
453	0.00013175
454	0.000132246
455	0.000130925
456	0.000132481
457	0.000134156
458	0.000133373
459	0.00013422
460	0.000135585
461	0.00013528
462	0.000134685
463	0.000133376
464	0.000130809
465	0.000128766
466	0.000127483
467	0.000125305
468	9.24484e-05
469	2.53307e-05
470	9.24765e-06
471	6.79014e-06
472	4.64188e-06
473	3.58729e-06
474	3.77998e-06
475	4.86783e-05
476	7.88147e-05
477	5.71919e-05
478	5.57736e-05
479	6.13782e-05
480	6.39215e-05
481	6.50679e-05
482	6.90251e-05
483	5.79025e-05
484	5.41585e-05
485	6.22777e-05
486	7.10018e-05
487	7.25396e-05
488	7.12501e-05
489	6.64701e-05
490	6.24166e-05
491	6.32557e-05
492	6.80863e-05
493	6.99797e-05
494	6.78486e-05
495	6.66598e-05
496	6.94513e-05
497	7.63671e-05
498	8.23249e-05
499	7.95002e-05
500	7.00218e-05
501	6.45187e-05
502	6.62752e-05
503	7.27885e-05
504	6.18788e-05
505	4.67413e-05
506	4.53631e-05
507	6.14076e-05
508	9.06571e-05
509	0.000119446
510	0.000132669
511	0.000125403
512	9.61569e-05
513	4.25683e-05
514	1.45609e-05
515	8.27009e-06
516	6.29864e-06
517	5.75118e-06
518	6.60089e-06
519	8.51322e-06
520	1.15624e-05
521	1.44835e-05
522	1.70914e-05
523	1.95649e-05
524	2.18805e-05
525	2.3383e-05
526	2.31811e-05
527	2.1682e-05
528	2.04964e-05
529	2.16798e-05
530	2.33986e-05
531	2.57152e-05
532	2.71777e-05
533	2.85522e-05
534	3.06579e-05
535	3.38807e-05
536	3.98054e-05
537	4.9226e-05
538	5.76155e-05
539	6.40281e-05
540	6.65785e-05
541	6.56511e-05
542	6.38921e-05
543	6.25308e-05
544	6.00696e-05
545	5.68805e-05
546	5.42352e-05
547	5.19731e-05
548	4.93906e-05
549	4.65304e-05
550	4.34708e-05
551	4.04721e-05
552	3.79573e-05
553	3.50525e-05
554	3.58604e-05
555	4.31963e-05
556	4.27455e-05
557	4.06116e-05
558	3.83723e-05
559	3.68289e-05
560	3.59334e-05
561	3.48165e-05
562	3.28227e-05
563	3.14726e-05
564	3.06959e-05
565	3.00754e-05
566	2.7543e-05
567	2.40328e-05
568	2.14842e-05
569	1.94605e-05
570	1.83422e-05
571	1.81397e-05
572	1.81355e-05
573	1.84131e-05
574	1.9396e-05
575	2.074e-05
576	2.1227e-05
577	1.98282e-05
578	1.7428e-05
579	1.55046e-05
580	1.47564e-05
581	1.46846e-05
582	1.46968e-05
583	1.47117e-05
584	1.50255e-05
585	1.61139e-05
586	1.67521e-05
587	1.56045e-05
588	1.48168e-05
589	1.4611e-05
590	1.43622e-05
591	1.50821e-05
592	2.73573e-05
593	4.41125e-05
594	4.73973e-05
595	3.60171e-05
596	1.94065e-05
597	1.43991e-05
598	1.46415e-05
599	1.46487e-05
600	2.3617e-05
601	3.88285e-05
602	4.04762e-05
603	3.15652e-05
604	2.34434e-05
605	2.16295e-05
606	2.50537e-05
607	3.48433e-05
608	4.94437e-05
609	6.32915e-05
610	7.16479e-05
611	7.15363e-05
612	6.40537e-05
613	6.05628e-05
614	7.01502e-05
615	7.42303e-05
616	6.54952e-05
617	5.53716e-05
618	5.83242e-05
619	7.36235e-05
620	8.5912e-05
621	9.17575e-05
622	9.51706e-05
623	9.65337e-05
624	9.17775e-05
625	6.9612e-05
626	5.30928e-05
627	4.31087e-05
628	5.12757e-05
629	8.32214e-05
630	8.5339e-05
631	7.24155e-05
632	1.05296e-05
633	7.10094e-06
634	7.15024e-06
635	1.29773e-05
636	7.61639e-05
637	8.88684e-05
638	8.75153e-05
639	7.90171e-05
640	7.50173e-05
641	6.44745e-05
642	6.67101e-05
643	7.14515e-05
644	7.37391e-05
645	0.000103189
646	0.000111992
647	0.000105259
648	8.94968e-05
649	7.20623e-05
650	7.07302e-05
651	7.47486e-05
652	6.85406e-05
653	6.00135e-05
654	4.34518e-05
655	2.81341e-05
656	2.01705e-05
657	1.81231e-05
658	2.53615e-05
659	8.36243e-05
660	0.000107535
661	8.82188e-05
662	3.22832e-05
663	1.0876e-05
664	1.01006e-05
665	2.24834e-05
666	4.17989e-05
667	6.14265e-05
668	6.8356e-05
669	6.85026e-05
670	0.000122822
671	0.000145624
672	0.000138163
673	0.000118978
674	6.15489e-05
675	3.73536e-05
676	2.689e-05
677	2.854e-05
678	6.23727e-05
679	0.000119125
680	0.000140216
681	0.000135085
682	9.59509e-05
683	3.11442e-05
684	1.04843e-05
685	6.42822e-06
686	5.62289e-06
687	6.02793e-06
688	6.83998e-06
689	8.66902e-06
690	1.06701e-05
691	1.2032e-05
692	1.30054e-05
693	1.36012e-05
694	1.388e-05
695	1.44524e-05
696	1.58308e-05
697	1.81418e-05
698	2.64803e-05
699	3.89903e-05
700	4.71744e-05
701	5.12978e-05
702	5.42737e-05
703	5.96767e-05
704	6.52405e-05
705	6.78135e-05
706	6.88149e-05
707	7.01611e-05
708	7.22263e-05
709	7.37818e-05
710	7.17718e-05
711	6.83492e-05
712	6.55434e-05
713	6.32326e-05
714	6.10863e-05
715	5.96249e-05
716	5.88547e-05
717	5.85462e-05
718	5.82396e-05
719	5.75176e-05
720	5.64075e-05
721	5.32456e-05
722	4.769e-05
723	4.1936e-05
724	3.78688e-05
725	3.5933e-05
726	3.39907e-05
727	3.43283e-05
728	3.19171e-05
729	2.92281e-05
730	2.68239e-05
731	2.48416e-05
732	2.32601e-05
733	2.22678e-05
734	2.15856e-05
735	2.10677e-05
736	2.05705e-05
737	2.00453e-05
738	1.98817e-05
739	1.97552e-05
740	1.98092e-05
741	2.04924e-05
742	2.13037e-05
743	2.13225e-05
744	2.08063e-05
745	2.27053e-05
746	2.88266e-05
747	2.3799e-05
748	2.28342e-05
749	2.59158e-05
750	2.59191e-05
751	2.31204e-05
752	2.20081e-05
753	2.2925e-05
754	2.40396e-05
755	2.49749e-05
756	2.55789e-05
757	2.44676e-05
758	2.2327e-05
759	2.2464e-05
760	2.78243e-05
761	3.26506e-05
762	3.3183e-05
763	3.29378e-05
764	3.25486e-05
765	3.23715e-05
766	3.22684e-05
767	3.18805e-05
768	3.10299e-05
769	2.95281e-05
770	3.05962e-05
771	3.65378e-05
772	4.5544e-05
773	5.29425e-05
774	5.79924e-05
775	6.27175e-05
776	6.5474e-05
777	6.62966e-05
778	7.18479e-05
779	7.54207e-05
780	7.54207e-05
781	7.47731e-05
782	7.27142e-05
783	6.95552e-05
784	6.77793e-05
785	6.87383e-05
786	7.0007e-05
787	7.02509e-05
788	6.95619e-05
789	6.88479e-05
790	6.84237e-05
791	6.85237e-05
792	6.84748e-05
793	6.86673e-05
794	6.75134e-05
795	6.61414e-05
796	6.94092e-05
797	7.5493e-05
798	7.90342e-05
799	8.03991e-05
800	7.9084e-05
801	7.46649e-05
802	6.65579e-05
803	6.26117e-05
804	6.68986e-05
805	7.44629e-05
806	8.07078e-05
807	8.28031e-05
808	7.99456e-05
809	6.84802e-05
810	5.11077e-05
811	3.70046e-05
812	2.9125e-05
813	2.58871e-05
814	2.64527e-05
815	3.19794e-05
816	4.58224e-05
817	6.45426e-05
818	6.97544e-05
819	7.00299e-05
820	7.10277e-05
821	7.35062e-05
822	7.40127e-05
823	7.55667e-05
824	7.91867e-05
825	7.5751e-05
826	6.65506e-05
827	5.82106e-05
828	5.31922e-05
829	5.25471e-05
830	6.03357e-05
831	7.02665e-05
832	7.37149e-05
833	6.73245e-05
834	5.64037e-05
835	4.73228e-05
836	4.71604e-05
837	4.20966e-05
838	3.8829e-05
839	3.99193e-05
840	4.28851e-05
841	4.4628e-05
842	4.52143e-05
843	4.29353e-05
844	4.10044e-05
845	3.84781e-05
846	3.83487e-05
847	4.60646e-05
848	5.2157e-05
849	4.54471e-05
850	3.51483e-05
851	2.81934e-05
852	2.45877e-05
853	2.19996e-05
854	1.90863e-05
855	1.74637e-05
856	1.81064e-05
857	2.14746e-05
858	2.59259e-05
859	3.01329e-05
860	3.43126e-05
861	3.66297e-05
862	3.77996e-05
863	4.07701e-05
864	4.11216e-05
865	3.58556e-05
866	2.82684e-05
867	2.278e-05
868	2.31654e-05
869	2.8916e-05
870	3.76723e-05
871	4.77866e-05
872	5.50702e-05
873	5.78275e-05
874	5.90504e-05
875	5.9783e-05
876	5.83252e-05
877	5.6628e-05
878	5.28719e-05
879	4.71065e-05
880	4.14763e-05
881	3.85379e-05
882	3.74006e-05
883	3.65828e-05
884	3.47054e-05
885	3.2272e-05
886	3.01481e-05
887	2.75615e-05
888	2.49352e-05
889	2.3248e-05
890	2.21212e-05
891	2.0351e-05
892	1.74089e-05
893	1.58822e-05
894	1.54091e-05
895	1.53134e-05
896	1.53637e-05
897	1.54486e-05
898	1.55154e-05
899	1.56426e-05
900	1.58989e-05
901	1.6165e-05
902	1.7184e-05
903	2.08616e-05
904	2.68413e-05
905	3.04281e-05
906	3.11037e-05
907	3.09918e-05
908	3.14213e-05
909	3.26528e-05
910	3.32812e-05
911	3.02529e-05
912	2.64035e-05
913	3.12546e-05
914	3.72439e-05
915	3.73476e-05
916	3.07673e-05
917	2.57686e-05
918	2.51236e-05
919	2.56493e-05
920	2.47514e-05
921	2.36764e-05
922	2.43492e-05
923	2.55828e-05
924	2.43793e-05
925	2.28758e-05
926	2.24123e-05
927	2.39709e-05
928	2.72699e-05
929	3.16622e-05
930	3.57541e-05
931	3.9039e-05
932	5.34585e-05
933	5.69343e-05
934	5.78052e-05
935	5.91069e-05
936	5.89599e-05
937	5.80238e-05
938	5.32029e-05
939	4.41458e-05
940	3.7927e-05
941	3.57039e-05
942	3.44712e-05
943	3.19247e-05
944	2.98438e-05
945	2.72687e-05
946	2.39686e-05
947	2.10168e-05
948	1.83111e-05
949	1.81459e-05
950	2.02016e-05
951	2.064e-05
952	1.88845e-05
953	1.83669e-05
954	2.10312e-05
955	2.44947e-05
956	2.82042e-05
957	3.04557e-05
958	3.50813e-05
959	3.83572e-05
960	4.17388e-05
961	4.9655e-05
962	5.71983e-05
963	5.87702e-05
964	5.74867e-05
965	5.74819e-05
966	5.68319e-05
967	5.52295e-05
968	5.43734e-05
969	5.31983e-05
970	5.14472e-05
971	4.96552e-05
972	4.84458e-05
973	4.70326e-05
974	4.3068e-05
975	3.47086e-05
976	2.76919e-05
977	2.31866e-05
978	2.11968e-05
979	2.0383e-05
980	2.04987e-05
981	2.15363e-05
982	2.4158e-05
983	2.75017e-05
984	2.86392e-05
985	2.88902e-05
986	2.96644e-05
987	3.10003e-05
988	3.33037e-05
989	3.70583e-05
990	4.33339e-05
991	5.08555e-05
992	5.63358e-05
993	5.53657e-05
994	5.1822e-05
995	4.79438e-05
996	4.54779e-05
997	4.64077e-05
998	4.67888e-05
999	4.55408e-05
1000	4.38162e-05
1001	4.20276e-05
1002	4.08579e-05
1003	3.93023e-05
1004	3.72177e-05
1005	3.48921e-05
1006	3.15051e-05
1007	2.80178e-05
1008	2.57879e-05
1009	2.50117e-05
1010	2.71904e-05
1011	3.44228e-05
1012	4.2385e-05
1013	4.72482e-05
1014	4.92841e-05
1015	4.77784e-05
1016	4.45708e-05
1017	4.39701e-05
1018	4.62227e-05
1019	4.90998e-05
1020	5.03462e-05
1021	5.06478e-05
1022	5.12026e-05
1023	5.25101e-05
1024	5.59413e-05
1025	6.07385e-05
1026	6.38937e-05
1027	6.61078e-05
1028	6.73872e-05
1029	6.78658e-05
1030	6.72251e-05
1031	6.47664e-05
1032	5.42176e-05
1033	4.43579e-05
1034	4.10486e-05
1035	4.03575e-05
1036	4.02975e-05
1037	4.49378e-05
1038	5.57987e-05
1039	5.20279e-05
1040	4.38589e-05
1041	3.81849e-05
1042	3.63456e-05
1043	3.93984e-05
1044	4.484e-05
1045	4.69433e-05
1046	4.56924e-05
1047	4.31386e-05
1048	4.0303e-05
1049	3.8048e-05
1050	3.71513e-05
1051	3.74371e-05
1052	3.89012e-05
1053	4.09215e-05
1054	4.38165e-05
1055	4.65097e-05
1056	4.72158e-05
1057	4.42847e-05
1058	3.62841e-05
1059	2.78961e-05
1060	2.37176e-05
1061	2.34675e-05
1062	2.52448e-05
1063	2.7787e-05
1064	3.01874e-05
1065	3.16399e-05
1066	3.15749e-05
1067	2.93927e-05
1068	2.59882e-05
1069	2.16064e-05
1070	1.72985e-05
1071	1.49281e-05
1072	1.46814e-05
1073	1.63428e-05
1074	1.92331e-05
1075	2.15228e-05
1076	2.32755e-05
1077	2.50341e-05
1078	2.52562e-05
1079	2.45495e-05
1080	2.47974e-05
1081	2.55837e-05
1082	2.64812e-05
1083	2.75863e-05
1084	2.645e-05
1085	2.282e-05
1086	1.80923e-05
1087	1.47131e-05
1088	1.39014e-05
1089	1.41793e-05
1090	1.47557e-05
1091	1.72825e-05
1092	2.09148e-05
1093	2.28111e-05
1094	2.41833e-05
1095	2.45567e-05
1096	2.48757e-05
1097	2.51607e-05
1098	2.55383e-05
1099	2.657e-05
1100	2.8912e-05
1101	3.34268e-05
1102	3.84724e-05
1103	4.06047e-05
1104	4.47687e-05
1105	4.82893e-05
1106	4.9898e-05
1107	4.82946e-05
1108	4.30195e-05
1109	3.48044e-05
1110	2.79119e-05
1111	2.79735e-05
1112	2.96996e-05
1113	3.7928e-05
1114	4.34961e-05
1115	4.81768e-05
1116	5.33194e-05
1117	4.91049e-05
1118	4.20445e-05
1119	3.70426e-05
1120	3.70156e-05
1121	4.59966e-05
1122	5.93333e-05
1123	6.47922e-05
1124	6.80495e-05
1125	7.0132e-05
1126	7.58491e-05
1127	8.2154e-05
1128	7.9902e-05
1129	7.42383e-05
1130	6.94956e-05
1131	6.51835e-05
1132	5.86537e-05
1133	5.04386e-05
1134	4.33144e-05
1135	3.77909e-05
1136	3.49973e-05
1137	3.57381e-05
1138	3.9185e-05
1139	4.52716e-05
1140	4.68626e-05
1141	4.30624e-05
1142	3.9476e-05
1143	3.73774e-05
1144	3.58435e-05
1145	3.36607e-05
1146	3.11348e-05
1147	2.92633e-05
1148	2.81276e-05
1149	2.71488e-05
1150	2.56341e-05
1151	2.44397e-05
1152	2.47924e-05
1153	2.86592e-05
1154	3.78138e-05
1155	4.54356e-05
1156	4.86561e-05
1157	4.86584e-05
1158	4.8233e-05
1159	4.7146e-05
1160	4.45016e-05
1161	4.1024e-05
1162	3.84336e-05
1163	3.758e-05
1164	3.88823e-05
1165	4.18414e-05
1166	4.59829e-05
1167	4.97562e-05
1168	5.13283e-05
1169	5.08862e-05
1170	4.94293e-05
1171	4.76426e-05
1172	4.62833e-05
1173	4.649e-05
1174	5.1888e-05
1175	6.34321e-05
1176	7.36972e-05
1177	7.73408e-05
1178	7.78637e-05
1179	7.69985e-05
1180	7.62327e-05
1181	7.60713e-05
1182	7.59023e-05
1183	7.5858e-05
1184	7.59111e-05
1185	7.36999e-05
1186	5.50058e-05
1187	3.40824e-05
1188	2.96448e-05
1189	2.86386e-05
1190	2.80013e-05
1191	2.80909e-05
1192	3.01352e-05
1193	3.888e-05
1194	5.4597e-05
1195	6.41868e-05
1196	6.7706e-05
1197	6.95309e-05
1198	7.05515e-05
1199	6.99574e-05
1200	6.69353e-05
1201	5.32574e-05
1202	4.2297e-05
1203	4.18909e-05
1204	3.98779e-05
1205	3.77418e-05
1206	3.17051e-05
1207	2.4743e-05
1208	2.32927e-05
1209	2.53818e-05
1210	3.16097e-05
1211	3.65934e-05
1212	3.59349e-05
1213	3.83349e-05
1214	5.07605e-05
1215	5.68012e-05
1216	5.43936e-05
1217	4.43814e-05
1218	3.04748e-05
1219	3.02749e-05
1220	3.2261e-05
1221	2.94667e-05
1222	2.88315e-05
1223	3.11341e-05
1224	3.20541e-05
1225	2.87836e-05
1226	2.91333e-05
1227	2.99335e-05
1228	2.70789e-05
1229	2.46927e-05
1230	2.19567e-05
1231	1.65339e-05
1232	1.14368e-05
1233	8.33452e-06
1234	7.51844e-06
1235	8.15375e-06
1236	9.22796e-06
1237	1.20057e-05
1238	2.3276e-05
1239	3.42426e-05
1240	3.74643e-05
1241	3.6437e-05
1242	3.46112e-05
1243	3.4179e-05
1244	3.44888e-05
1245	4.40295e-05
1246	6.16813e-05
1247	6.6989e-05
1248	6.58832e-05
1249	6.34138e-05
1250	5.81664e-05
1251	4.97211e-05
1252	4.45199e-05
1253	4.41153e-05
1254	4.6379e-05
1255	4.90201e-05
1256	4.83566e-05
1257	4.34583e-05
1258	3.80701e-05
1259	3.44941e-05
1260	3.4665e-05
1261	4.24688e-05
1262	6.58551e-05
1263	7.56862e-05
1264	7.49001e-05
1265	7.27926e-05
1266	7.19752e-05
1267	7.17828e-05
1268	7.16537e-05
1269	7.1686e-05
1270	7.15953e-05
1271	7.08526e-05
1272	6.9274e-05
1273	6.97293e-05
1274	7.05266e-05
1275	7.06625e-05
1276	6.32686e-05
1277	3.85175e-05
1278	2.98207e-05
1279	2.48904e-05
1280	2.35043e-05
1281	2.67599e-05
1282	4.01279e-05
1283	5.9273e-05
1284	6.59732e-05
1285	6.59604e-05
1286	6.29322e-05
1287	5.88859e-05
1288	5.39055e-05
1289	4.94865e-05
1290	4.70533e-05
1291	4.67895e-05
1292	4.79881e-05
1293	5.10849e-05
1294	5.73015e-05
1295	6.68166e-05
1296	7.29559e-05
1297	7.32178e-05
1298	7.11757e-05
1299	6.90044e-05
1300	6.6822e-05
1301	6.50702e-05
1302	6.45412e-05
1303	6.4794e-05
1304	6.56054e-05
1305	6.61354e-05
1306	6.6236e-05
1307	6.63159e-05
1308	6.70188e-05
1309	6.79993e-05
1310	6.83432e-05
1311	6.77164e-05
1312	6.66934e-05
1313	6.57893e-05
1314	6.54274e-05
1315	6.53239e-05
1316	6.53493e-05
1317	6.59021e-05
1318	6.68318e-05
1319	6.91964e-05
1320	7.21431e-05
1321	7.40735e-05
1322	7.6002e-05
1323	7.70902e-05
1324	7.54276e-05
1325	7.21122e-05
1326	7.20809e-05
1327	7.25799e-05
1328	7.04713e-05
1329	5.86556e-05
1330	3.40405e-05
1331	2.54549e-05
1332	2.39392e-05
1333	2.50941e-05
1334	3.7806e-05
1335	5.19842e-05
1336	5.35084e-05
1337	5.11841e-05
1338	5.0763e-05
1339	5.21113e-05
1340	5.93581e-05
1341	6.34493e-05
1342	5.77378e-05
1343	4.65693e-05
1344	3.8613e-05
1345	3.46836e-05
1346	3.19134e-05
1347	2.92002e-05
1348	2.66793e-05
1349	2.76741e-05
1350	3.74854e-05
1351	4.84894e-05
1352	5.15558e-05
1353	5.08391e-05
1354	4.6867e-05
1355	3.44758e-05
1356	2.13972e-05
1357	1.737e-05
1358	1.72682e-05
1359	1.98834e-05
1360	2.92265e-05
1361	3.99336e-05
1362	4.67658e-05
1363	5.00998e-05
1364	5.13099e-05
1365	5.07218e-05
1366	4.81733e-05
1367	4.67591e-05
1368	4.37946e-05
1369	3.29896e-05
1370	1.78822e-05
1371	1.37376e-05
1372	1.30044e-05
1373	1.36805e-05
1374	1.83765e-05
1375	3.04865e-05
1376	3.91394e-05
1377	4.28986e-05
1378	4.70263e-05
1379	5.08343e-05
1380	5.2251e-05
1381	5.26565e-05
1382	5.27334e-05
1383	5.22115e-05
1384	4.96774e-05
1385	4.50997e-05
1386	4.21285e-05
1387	4.37833e-05
1388	4.81925e-05
1389	5.23617e-05
1390	5.30861e-05
1391	5.28131e-05
1392	5.24723e-05
1393	5.19049e-05
1394	5.135e-05
1395	5.09161e-05
1396	5.11222e-05
1397	5.1876e-05
1398	5.12529e-05
1399	4.91716e-05
1400	4.66137e-05
1401	4.48223e-05
1402	4.65846e-05
1403	5.28946e-05
1404	5.82083e-05
1405	5.89382e-05
1406	5.73508e-05
1407	5.57571e-05
1408	5.46607e-05
1409	5.40265e-05
1410	5.35268e-05
1411	5.32836e-05
1412	5.4745e-05
1413	5.82242e-05
1414	5.92789e-05
1415	5.87882e-05
1416	5.72586e-05
1417	5.42777e-05
1418	5.25367e-05
1419	5.27267e-05
1420	5.48526e-05
1421	5.73251e-05
1422	5.88138e-05
1423	5.86673e-05
1424	5.70335e-05
1425	5.40714e-05
1426	5.03187e-05
1427	4.76526e-05
1428	4.58617e-05
1429	4.51552e-05
1430	4.60325e-05
1431	4.96103e-05
1432	5.65209e-05
1433	6.09337e-05
1434	6.20063e-05
1435	6.12189e-05
1436	5.75911e-05
1437	5.34107e-05
1438	5.12119e-05
1439	5.05041e-05
1440	5.03206e-05
1441	5.04894e-05
1442	5.0088e-05
1443	4.91157e-05
1444	4.9779e-05
1445	5.15118e-05
1446	5.23465e-05
1447	5.24157e-05
1448	5.11815e-05
1449	4.90271e-05
1450	4.81248e-05
1451	4.88175e-05
1452	4.83576e-05
1453	4.62806e-05
1454	4.27462e-05
1455	4.15858e-05
1456	4.49419e-05
1457	5.00046e-05
1458	5.44197e-05
1459	5.87998e-05
1460	6.30429e-05
1461	6.53086e-05
1462	6.5715e-05
1463	6.37889e-05
1464	5.85819e-05
1465	5.24711e-05
1466	4.68068e-05
1467	4.13102e-05
1468	3.77727e-05
1469	3.96259e-05
1470	5.04277e-05
1471	5.86667e-05
1472	5.63488e-05
1473	4.71711e-05
1474	3.9909e-05
1475	4.09116e-05
1476	4.52632e-05
1477	4.63174e-05
1478	4.48797e-05
1479	4.1191e-05
1480	4.00416e-05
1481	4.04478e-05
1482	4.15194e-05
1483	4.76002e-05
1484	5.21811e-05
1485	5.60728e-05
1486	5.92097e-05
1487	6.10145e-05
1488	6.07585e-05
1489	5.85071e-05
1490	5.31037e-05
1491	4.61411e-05
1492	4.02646e-05
1493	3.85331e-05
1494	4.21362e-05
1495	4.94857e-05
1496	5.37126e-05
1497	5.47693e-05
1498	5.45515e-05
1499	5.41392e-05
1500	5.37383e-05
1501	5.35691e-05
1502	5.33302e-05
1503	5.30689e-05
1504	5.26795e-05
1505	5.26755e-05
1506	5.31902e-05
1507	5.4035e-05
1508	5.57052e-05
1509	5.89553e-05
1510	6.03723e-05
1511	6.07916e-05
1512	6.13272e-05
1513	6.20955e-05
1514	6.2761e-05
1515	6.33422e-05
1516	6.31356e-05
1517	6.19429e-05
1518	6.06099e-05
1519	5.87474e-05
1520	5.67033e-05
1521	5.54703e-05
1522	5.47839e-05
1523	5.40612e-05
1524	5.30237e-05
1525	5.17711e-05
1526	5.12682e-05
1527	5.14057e-05
1528	5.12951e-05
1529	5.2175e-05
1530	5.49159e-05
1531	5.77451e-05
1532	6.0257e-05
1533	6.23676e-05
1534	6.36174e-05
1535	6.37065e-05
1536	6.34682e-05
1537	6.23188e-05
1538	5.96296e-05
1539	5.60477e-05
1540	5.3873e-05
1541	5.35499e-05
1542	5.40517e-05
1543	5.42201e-05
1544	5.40324e-05
1545	5.33778e-05
1546	5.29504e-05
1547	5.31553e-05
1548	5.23643e-05
1549	4.86869e-05
1550	4.60102e-05
1551	4.57261e-05
1552	4.65976e-05
1553	4.89264e-05
1554	5.20683e-05
1555	5.62345e-05
1556	6.0489e-05
1557	6.27496e-05
1558	6.15324e-05
1559	5.95931e-05
1560	5.88644e-05
1561	5.95875e-05
1562	6.12553e-05
1563	6.35749e-05
1564	6.34592e-05
1565	6.16239e-05
1566	6.0057e-05
1567	5.46652e-05
1568	5.0589e-05
1569	4.84965e-05
1570	5.00014e-05
1571	4.95154e-05
1572	4.86666e-05
1573	4.78037e-05
1574	4.82404e-05
1575	4.89714e-05
1576	5.00472e-05
1577	5.16774e-05
1578	5.48882e-05
1579	5.93486e-05
1580	6.36164e-05
1581	6.51942e-05
1582	6.41307e-05
1583	6.33179e-05
1584	6.34044e-05
1585	6.36654e-05
1586	6.42664e-05
1587	6.40611e-05
1588	6.30804e-05
1589	6.08223e-05
1590	5.58162e-05
1591	5.1523e-05
1592	5.13997e-05
1593	5.22928e-05
1594	5.28733e-05
1595	5.27126e-05
1596	5.13733e-05
1597	4.83616e-05
1598	4.60505e-05
1599	4.69564e-05
1600	5.00134e-05
1601	5.5973e-05
1602	6.3799e-05
1603	6.9923e-05
1604	7.19213e-05
1605	7.14594e-05
1606	7.06396e-05
1607	6.858e-05
1608	6.31801e-05
1609	5.88609e-05
1610	5.53532e-05
1611	5.05783e-05
1612	4.59481e-05
1613	4.48274e-05
1614	4.77238e-05
1615	5.28912e-05
1616	5.61332e-05
1617	5.81377e-05
1618	5.90227e-05
1619	5.77585e-05
1620	5.60793e-05
1621	5.10699e-05
1622	4.52904e-05
1623	4.29602e-05
1624	4.85609e-05
1625	5.67949e-05
1626	6.33128e-05
1627	6.45902e-05
1628	6.39396e-05
1629	6.37301e-05
1630	6.38241e-05
1631	6.40254e-05
1632	6.40216e-05
1633	6.37549e-05
1634	6.24185e-05
1635	5.99725e-05
1636	6.05095e-05
1637	6.07415e-05
1638	5.72738e-05
1639	5.51119e-05
1640	5.63374e-05
1641	6.21966e-05
1642	6.60813e-05
1643	6.1137e-05
1644	5.54321e-05
1645	5.27065e-05
1646	5.49396e-05
1647	6.65995e-05
1648	8.21796e-05
1649	8.5167e-05
1650	8.2184e-05
1651	8.05383e-05
1652	7.99395e-05
1653	7.99683e-05
1654	7.98179e-05
1655	7.87827e-05
1656	7.37252e-05
1657	6.71312e-05
1658	6.25501e-05
1659	6.33342e-05
1660	6.70064e-05
1661	6.86036e-05
1662	6.74229e-05
1663	6.47398e-05
1664	6.11028e-05
1665	5.7274e-05
1666	5.61551e-05
1667	5.67601e-05
1668	5.67901e-05
1669	5.94836e-05
1670	6.38859e-05
1671	7.141e-05
1672	7.72719e-05
1673	7.95409e-05
1674	7.94225e-05
1675	7.82663e-05
1676	7.5177e-05
1677	7.00214e-05
1678	6.42867e-05
1679	5.96475e-05
1680	5.77176e-05
1681	6.0327e-05
1682	6.2936e-05
1683	6.31398e-05
1684	5.98902e-05
1685	5.93774e-05
1686	6.14041e-05
1687	6.13543e-05
1688	5.22718e-05
1689	3.7657e-05
1690	3.44096e-05
1691	4.07236e-05
1692	5.31905e-05
1693	6.45944e-05
1694	6.8151e-05
1695	6.82972e-05
1696	6.79045e-05
1697	6.74708e-05
1698	6.75428e-05
1699	6.92674e-05
1700	6.94529e-05
1701	6.71525e-05
1702	6.00367e-05
1703	4.90515e-05
1704	4.37257e-05
1705	4.53316e-05
1706	5.803e-05
1707	6.97888e-05
1708	7.20903e-05
1709	6.99562e-05
1710	6.56199e-05
1711	6.16787e-05
1712	6.0284e-05
1713	6.02262e-05
1714	6.14673e-05
1715	6.28322e-05
1716	6.35396e-05
1717	6.36062e-05
1718	6.55431e-05
1719	6.8007e-05
1720	7.0835e-05
1721	7.49364e-05
1722	7.77896e-05
1723	7.6037e-05
1724	7.03242e-05
1725	6.6441e-05
1726	6.49747e-05
1727	6.38994e-05
1728	6.38284e-05
1729	6.47749e-05
1730	6.58241e-05
1731	6.73172e-05
1732	7.08441e-05
1733	7.3591e-05
1734	7.34961e-05
1735	7.0939e-05
1736	6.70836e-05
1737	6.35286e-05
1738	6.08512e-05
1739	6.03475e-05
1740	6.15699e-05
1741	6.5042e-05
1742	6.82005e-05
1743	6.95233e-05
1744	6.92108e-05
1745	6.75093e-05
1746	6.42364e-05
1747	5.95924e-05
1748	5.64893e-05
1749	5.46059e-05
1750	5.33262e-05
1751	5.36177e-05
1752	5.39962e-05
1753	5.42972e-05
1754	5.52942e-05
1755	5.6215e-05
1756	5.60146e-05
1757	5.48107e-05
1758	5.30579e-05
1759	5.26607e-05
1760	5.18015e-05
1761	4.86096e-05
1762	4.3869e-05
1763	4.25477e-05
1764	4.62316e-05
1765	5.35488e-05
1766	5.95556e-05
1767	6.18149e-05
1768	6.24165e-05
1769	6.29373e-05
1770	6.33706e-05
1771	6.36454e-05
1772	6.36801e-05
1773	6.34479e-05
1774	6.30612e-05
1775	6.2653e-05
1776	6.27721e-05
1777	6.37782e-05
1778	6.62047e-05
1779	6.83361e-05
1780	6.89498e-05
1781	6.82418e-05
1782	6.67973e-05
1783	6.52778e-05
1784	6.38769e-05
1785	6.3621e-05
1786	6.45391e-05
1787	6.58476e-05
1788	6.73029e-05
1789	6.9274e-05
1790	7.10906e-05
1791	7.09952e-05
1792	6.91307e-05
1793	6.73746e-05
1794	6.64219e-05
1795	6.60659e-05
1796	6.55675e-05
1797	6.50034e-05
1798	6.53976e-05
1799	6.72954e-05
1800	7.05449e-05
1801	7.31734e-05
1802	7.39806e-05
1803	7.27035e-05
1804	7.05064e-05
1805	6.90713e-05
1806	6.87255e-05
1807	6.79789e-05
1808	6.7545e-05
1809	6.7403e-05
1810	6.30123e-05
1811	5.71486e-05
1812	5.75959e-05
1813	6.35169e-05
1814	6.75855e-05
1815	6.99804e-05
1816	7.34594e-05
1817	7.50318e-05
1818	7.50169e-05
1819	7.31659e-05
1820	6.92872e-05
1821	6.24562e-05
1822	5.47778e-05
1823	5.10415e-05
1824	5.34457e-05
1825	5.32127e-05
1826	5.21204e-05
1827	5.62489e-05
1828	6.14731e-05
1829	6.36794e-05
1830	6.51303e-05
1831	6.57446e-05
1832	6.54677e-05
1833	6.41257e-05
1834	5.81841e-05
1835	5.4182e-05
1836	5.39009e-05
1837	5.8755e-05
1838	6.0561e-05
1839	5.8734e-05
1840	5.79479e-05
1841	5.75505e-05
1842	5.64208e-05
1843	5.37024e-05
1844	4.77461e-05
1845	4.17082e-05
1846	3.79951e-05
1847	3.62925e-05
1848	3.69784e-05
1849	4.33636e-05
1850	5.41223e-05
1851	5.87102e-05
1852	5.99217e-05
1853	6.07733e-05
1854	6.11708e-05
1855	6.09411e-05
1856	5.97381e-05
1857	5.70324e-05
1858	5.44546e-05
1859	5.65353e-05
1860	6.24924e-05
1861	6.64947e-05
1862	6.62821e-05
1863	6.43724e-05
1864	6.30653e-05
1865	6.26812e-05
1866	6.28164e-05
1867	6.32789e-05
1868	6.40754e-05
1869	6.43469e-05
1870	6.40902e-05
1871	6.45793e-05
1872	6.52998e-05
1873	6.45177e-05
1874	6.38353e-05
1875	6.35257e-05
1876	6.2585e-05
1877	5.87485e-05
1878	5.15898e-05
1879	4.86449e-05
1880	5.27418e-05
1881	5.87224e-05
1882	5.82869e-05
1883	5.60967e-05
1884	5.53622e-05
1885	5.73407e-05
1886	5.93585e-05
1887	6.01947e-05
1888	6.11497e-05
1889	6.13948e-05
1890	6.04484e-05
1891	5.65841e-05
1892	4.93545e-05
1893	4.39135e-05
1894	4.16184e-05
1895	4.15377e-05
1896	4.47176e-05
1897	5.15739e-05
1898	5.53498e-05
1899	5.50538e-05
1900	5.2178e-05
1901	4.82742e-05
1902	4.4876e-05
1903	4.2496e-05
1904	4.06975e-05
1905	3.88901e-05
1906	3.75638e-05
1907	4.01087e-05
1908	4.75099e-05
1909	5.38e-05
1910	5.66603e-05
1911	6.13654e-05
1912	6.55708e-05
1913	6.5109e-05
1914	5.92087e-05
1915	5.18339e-05
1916	4.62749e-05
1917	4.35136e-05
1918	4.26123e-05
1919	4.38742e-05
1920	4.81272e-05
1921	5.45316e-05
1922	5.82364e-05
1923	5.89213e-05
1924	5.81117e-05
1925	5.74668e-05
1926	5.6936e-05
1927	5.27528e-05
1928	4.62415e-05
1929	4.50143e-05
1930	4.94283e-05
1931	5.73602e-05
1932	6.24081e-05
1933	6.32869e-05
1934	6.35849e-05
1935	6.38624e-05
1936	6.36344e-05
1937	6.25421e-05
1938	5.70783e-05
1939	5.19746e-05
1940	4.99868e-05
1941	5.00874e-05
1942	5.10805e-05
1943	5.3308e-05
1944	5.72652e-05
1945	6.06393e-05
1946	6.17608e-05
1947	6.06984e-05
1948	5.77835e-05
1949	5.29283e-05
1950	4.82345e-05
1951	4.47881e-05
1952	4.40884e-05
1953	4.59179e-05
1954	5.0239e-05
1955	5.38634e-05
1956	5.34922e-05
1957	5.32894e-05
1958	5.51882e-05
1959	5.73695e-05
1960	5.95149e-05
1961	6.25697e-05
1962	6.4546e-05
1963	6.31314e-05
1964	6.04217e-05
1965	5.84332e-05
1966	5.65336e-05
1967	5.53128e-05
1968	5.51535e-05
1969	5.58225e-05
1970	5.55651e-05
1971	5.36218e-05
1972	5.23771e-05
1973	5.30704e-05
1974	5.16771e-05
1975	5.11812e-05
1976	5.12407e-05
1977	5.14654e-05
1978	5.13342e-05
1979	5.0451e-05
1980	4.89321e-05
1981	4.85371e-05
1982	5.08121e-05
1983	5.55457e-05
1984	5.96956e-05
1985	6.18786e-05
1986	6.22885e-05
1987	6.07825e-05
1988	5.75139e-05
1989	5.35107e-05
1990	5.21373e-05
1991	5.22889e-05
1992	5.31851e-05
1993	5.5785e-05
1994	5.85431e-05
1995	5.95431e-05
1996	5.90927e-05
1997	5.87764e-05
1998	5.87564e-05
[truncated: 13,361 more rows]

## Sheet: summer329
hours	concentration
0	0
1	0
2	0
3	0
4	0
5	0
6	0
7	0
8	0
9	0
10	0
11	0
12	0
13	1.89014e-27
14	5.7556e-26
15	1.01629e-21
16	3.80419e-18
17	4.00633e-17
18	1.77249e-15
19	3.22067e-15
20	2.66547e-15
21	8.12553e-16
22	5.86299e-16
23	3.45921e-15
24	5.47057e-15
25	7.79377e-15
26	6.30526e-15
27	2.33426e-15
28	8.2088e-16
29	7.54269e-16
30	6.23682e-16
31	3.27398e-16
32	2.15329e-13
33	2.59154e-13
34	4.27064e-13
35	2.11222e-11
36	1.17681e-10
37	2.23789e-10
38	2.60125e-10
39	1.9518e-10
40	9.96725e-11
41	4.22103e-11
42	7.60534e-13
43	7.20484e-13
44	2.95188e-12
45	3.03502e-11
46	9.1322e-11
47	1.50417e-10
48	1.79932e-10
49	1.56554e-10
50	1.34254e-10
51	1.23709e-10
52	1.42719e-10
53	8.47827e-10
54	5.41946e-09
55	6.694e-09
56	1.5807e-09
57	1.991e-10
58	1.28648e-10
59	1.20516e-10
60	1.20455e-10
61	9.95509e-11
62	8.36571e-11
63	8.14005e-11
64	8.74942e-11
65	1.08791e-10
66	1.20209e-10
67	1.20322e-10
68	1.15049e-10
69	1.08249e-10
70	1.01327e-10
71	8.85174e-11
72	7.7763e-11
73	7.72576e-11
74	1.70563e-10
75	2.73332e-10
76	2.13039e-10
77	1.58179e-10
78	1.38208e-10
79	1.05453e-10
80	9.43095e-11
81	8.75616e-11
82	6.93818e-11
83	6.39271e-11
84	5.84171e-11
85	5.07894e-11
86	4.0258e-11
87	3.65197e-11
88	4.59953e-11
89	7.83167e-11
90	2.58571e-11
91	1.18465e-10
92	2.33974e-08
93	5.50727e-08
94	6.16073e-08
95	4.51366e-08
96	1.70265e-08
97	2.25459e-09
98	2.9277e-09
99	1.85459e-08
100	1.31046e-08
101	4.08987e-09
102	1.27889e-08
103	1.2887e-08
104	1.29491e-08
105	1.35061e-08
106	1.37697e-08
107	3.76143e-08
108	6.35086e-07
109	1.55053e-06
110	2.87841e-06
111	5.61033e-06
112	8.98137e-06
113	8.45468e-06
114	6.9313e-06
115	9.53518e-06
116	2.49612e-05
117	3.83111e-05
118	5.68299e-05
119	7.02402e-05
120	6.92238e-05
121	6.72425e-05
122	6.45349e-05
123	5.95198e-05
124	5.29205e-05
125	4.58674e-05
126	4.24707e-05
127	4.52549e-05
128	5.74986e-05
129	6.70682e-05
130	6.7282e-05
131	6.41623e-05
132	6.24748e-05
133	6.34495e-05
134	6.35691e-05
135	6.11415e-05
136	5.60804e-05
137	5.0036e-05
138	4.4389e-05
139	3.98986e-05
140	3.92945e-05
141	3.93964e-05
142	4.34118e-05
143	4.92111e-05
144	5.16888e-05
145	5.06657e-05
146	4.61803e-05
147	4.26196e-05
148	3.17702e-05
149	1.70794e-05
150	1.38769e-05
151	1.65865e-05
152	2.08454e-05
153	2.01368e-05
154	1.99788e-05
155	2.27513e-05
156	2.47112e-05
157	2.26709e-05
158	1.93504e-05
159	1.71017e-05
160	1.75361e-05
161	1.8762e-05
162	1.84054e-05
163	2.00113e-05
164	3.74386e-05
165	6.61171e-05
166	9.63654e-05
167	0.000117193
168	0.000128917
169	0.000134873
170	0.000135227
171	0.000132192
172	0.000129051
173	0.000129632
174	0.000133834
175	0.000144304
176	0.000168436
177	0.000189148
178	0.000214647
179	0.000241035
180	0.000258018
181	0.00025493
182	0.000248435
183	0.000232141
184	0.000221468
185	0.000227484
186	0.000266105
187	0.000301316
188	0.000318618
189	0.000349173
190	0.000427023
191	0.000444585
192	0.000426117
193	0.000399864
194	0.000382064
195	0.000360002
196	0.00033892
197	0.000310337
198	0.000294564
199	0.000288182
200	0.000278736
201	0.000272188
202	0.000268449
203	0.000270756
204	0.000268534
205	0.000261863
206	0.000251979
207	0.000231134
208	0.000206601
209	0.000188447
210	0.000174259
211	0.000162986
212	0.000154759
213	0.000143847
214	0.00013019
215	0.000120655
216	0.000109706
217	9.92966e-05
218	9.51129e-05
219	9.29778e-05
220	7.3711e-05
221	5.20061e-05
222	7.09639e-05
223	9.3994e-05
224	8.44997e-05
225	5.83814e-05
226	6.40599e-05
227	7.62897e-05
228	0.000131001
229	0.000157693
230	0.000149615
231	0.000147477
232	0.000209998
233	0.000303563
234	0.000326831
235	0.000310015
236	0.000308427
237	0.000286312
238	0.000228079
239	0.000190157
240	0.000177691
241	0.000198474
242	0.000246277
243	0.000278914
244	0.000301492
245	0.00030248
246	0.000328039
247	0.000384962
248	0.000394693
249	0.000344508
250	0.000337035
251	0.000330688
252	0.000168089
253	9.60773e-05
254	0.000111794
255	0.000127919
256	0.000189445
257	0.00040536
258	0.00056038
259	0.000708428
260	0.000789763
261	0.000728723
262	0.000623324
263	0.000581688
264	0.000558246
265	0.000728734
266	0.000833365
267	0.000840969
268	0.000840513
269	0.000820296
270	0.000768542
271	0.000787306
272	0.000827697
273	0.000879483
274	0.000890168
275	0.000882964
276	0.000896434
277	0.000896434
278	0.000896183
279	0.000894035
280	0.000901776
281	0.000920077
282	0.000938966
283	0.000958368
284	0.000969521
285	0.000968564
286	0.000969121
287	0.000962963
288	0.000954416
289	0.000941907
290	0.000920553
291	0.000892134
292	0.000863234
293	0.000831524
294	0.0007161
295	0.000487698
296	0.000317417
297	0.000283745
298	0.00029415
299	0.000296811
300	0.000304664
301	0.000326447
302	0.000333158
303	0.000459952
304	0.000736715
305	0.000771614
306	0.000754207
307	0.000720087
308	0.000762642
309	0.000779823
310	0.000781463
311	0.000760763
312	0.000702593
313	0.00066016
314	0.000655165
315	0.000598032
316	0.000537769
317	0.000509724
318	0.000476012
319	0.000420311
320	0.000298783
321	0.000244871
322	0.000235998
323	0.000220569
324	0.000187436
325	0.000147412
326	0.000117565
327	0.000118151
328	0.000130535
329	0.000127706
330	0.000113947
331	0.000114183
332	0.000118008
333	0.000129077
334	0.000148928
335	0.0001838
336	0.00023942
337	0.000314092
338	0.000402529
339	0.000508157
340	0.000583988
341	0.000589984
342	0.00058262
343	0.000576474
344	0.000579102
345	0.000610232
346	0.000684765
347	0.000743393
348	0.000768395
349	0.000763608
350	0.000745134
351	0.000742345
352	0.000742344
353	0.000740615
354	0.000737202
355	0.000739907
356	0.000758209
357	0.000769431
358	0.000775413
359	0.000795094
360	0.000824077
361	0.000856692
362	0.000873179
363	0.000885651
364	0.000867122
365	0.0008393
366	0.00082659
367	0.000785257
368	0.000724245
369	0.000652239
370	0.000584512
371	0.000572075
372	0.000522995
373	0.000366258
374	0.000296619
375	0.000288146
376	0.000177619
377	0.000112359
378	0.000105585
379	0.000102213
380	9.54792e-05
381	9.13615e-05
382	0.000121577
383	0.000327206
384	0.000484979
385	0.000601992
386	0.000629235
387	0.000581385
388	0.000375061
389	0.000195793
390	0.000196084
391	0.000202328
392	0.000250849
393	0.000340248
394	0.000328049
395	0.000429892
396	0.00048452
397	0.000384292
398	0.000327774
399	0.000377131
400	0.00035026
401	0.000342489
402	0.000374646
403	0.000410741
404	0.000550324
405	0.00074626
406	0.000840248
407	0.000854524
408	0.000812994
409	0.000793185
410	0.000833359
411	0.000894127
412	0.000938946
413	0.000959609
414	0.000967102
415	0.000968702
416	0.000955213
417	0.000895434
418	0.000764836
419	0.000657509
420	0.000717212
421	0.000891002
422	0.000971958
423	0.000999215
424	0.00100599
425	0.00100468
426	0.00100522
427	0.00100524
428	0.00100524
429	0.00100524
430	0.00100036
431	0.000977757
432	0.000985031
433	0.000988566
434	0.000976168
435	0.000959049
436	0.000935222
437	0.000923044
438	0.000916976
439	0.000913772
440	0.000899729
441	0.000886333
442	0.000873047
443	0.000863376
444	0.000848906
445	0.00080122
446	0.000764993
447	0.000768581
448	0.000784048
449	0.000796192
450	0.000815018
451	0.000821918
452	0.00081931
453	0.000794394
454	0.000774252
455	0.000799778
456	0.00082066
457	0.000814462
458	0.000794238
459	0.000787448
460	0.000793157
461	0.000813447
462	0.00082604
463	0.000827524
464	0.000829459
465	0.0008303
466	0.000830773
467	0.000830515
468	0.000829658
469	0.000831944
470	0.000834245
471	0.000836731
472	0.000837809
473	0.000838571
474	0.000839565
475	0.000840261
476	0.000840441
477	0.000798157
478	0.000700911
479	0.000590243
480	0.000562698
481	0.000611249
482	0.000668571
483	0.000696772
484	0.000714041
485	0.000742481
486	0.000767035
487	0.000775047
488	0.000747709
489	0.000735231
490	0.000759539
491	0.000765376
492	0.000760505
493	0.00075374
494	0.000748159
495	0.00074389
496	0.00074073
497	0.000737951
498	0.000735697
499	0.000736383
500	0.000736696
501	0.000736517
502	0.000731091
503	0.000665103
504	0.000595643
505	0.000609833
506	0.000709362
507	0.000732444
508	0.000737849
509	0.000754271
510	0.000759492
511	0.00075862
512	0.000755983
513	0.00074944
514	0.000710067
515	0.000644333
516	0.000652001
517	0.000672338
518	0.000661167
519	0.000638082
520	0.00063611
521	0.000639808
522	0.000648429
523	0.000650023
524	0.000656836
525	0.000662232
526	0.000666902
527	0.000672741
528	0.000679423
529	0.000685975
530	0.000694129
531	0.000702247
532	0.000710853
533	0.000714351
534	0.000713629
535	0.000711485
536	0.000706974
537	0.000704343
538	0.000699647
539	0.000697523
540	0.00069768
541	0.000700497
542	0.00070627
543	0.000717584
544	0.000736052
545	0.000759669
546	0.000783504
547	0.000800688
548	0.000810854
549	0.0008151
550	0.000815223
551	0.000815223
552	0.000815223
553	0.000811796
554	0.000778316
555	0.000764033
556	0.000770233
557	0.000772608
558	0.000701424
559	0.00067115
560	0.000713627
561	0.000764404
562	0.000840404
563	0.000848991
564	0.000846635
565	0.000814494
566	0.000779695
567	0.000816732
568	0.000824471
569	0.000817499
570	0.000812533
571	0.000808936
572	0.000800569
573	0.000796
574	0.000795846
575	0.000796979
576	0.000797413
577	0.000797817
578	0.000801176
579	0.000810178
580	0.000810565
581	0.000804967
582	0.000799076
583	0.000794548
584	0.000790911
585	0.000788936
586	0.000787554
587	0.000784826
588	0.000782216
589	0.000782197
590	0.000776104
591	0.000758381
592	0.000765088
593	0.000711689
594	0.000698805
595	0.000699484
596	0.000702829
597	0.000730475
598	0.000740563
599	0.000739576
600	0.000726771
601	0.000712497
602	0.000724109
603	0.000742749
604	0.000748588
605	0.000743125
606	0.000733406
607	0.000720724
608	0.000706751
609	0.000692538
610	0.000678443
611	0.000655855
612	0.000633845
613	0.000610341
614	0.000558148
615	0.000522229
616	0.00050882
617	0.000507371
618	0.000518907
619	0.000527866
620	0.000524627
621	0.000517924
622	0.000495023
623	0.00045995
624	0.000426087
625	0.000416081
626	0.000435775
627	0.00045942
628	0.000472175
629	0.000477639
630	0.000474915
631	0.000472174
632	0.000468559
633	0.000464784
634	0.000452489
635	0.000429977
636	0.000435142
637	0.000481591
638	0.00052475
639	0.000547783
640	0.000562187
641	0.000574908
642	0.000592222
643	0.000610218
644	0.000626763
645	0.000641136
646	0.000655392
647	0.00066884
648	0.000678177
649	0.000687298
650	0.000687789
651	0.000675689
652	0.000658431
653	0.000654886
654	0.000685685
655	0.000733074
656	0.00076153
657	0.000777231
658	0.000778658
659	0.000776886
660	0.000768037
661	0.000750608
662	0.000730158
663	0.000697862
664	0.000717645
665	0.000768457
666	0.000774057
667	0.000764398
668	0.000757362
669	0.000754197
670	0.000762282
671	0.000765146
672	0.000730047
673	0.000685569
674	0.000661683
675	0.000646138
676	0.000654255
677	0.000683766
678	0.000693492
679	0.000693311
680	0.000688505
681	0.000690119
682	0.000695283
683	0.000698348
684	0.000698339
685	0.000698103
686	0.000697851
687	0.000697682
688	0.000696212
689	0.000693805
690	0.000684914
691	0.000664589
692	0.000650098
693	0.00064851
694	0.000650383
695	0.000650847
696	0.000651765
697	0.00065277
698	0.000653056
699	0.00065045
700	0.000638264
701	0.000636642
702	0.000633326
703	0.000626783
704	0.000630374
705	0.000638764
706	0.000639004
707	0.000639004
708	0.000639004
709	0.000638878
710	0.000638737
711	0.000630033
712	0.000624348
713	0.000607497
714	0.000542851
715	0.000481267
716	0.000471301
717	0.000493892
718	0.000509482
719	0.00050813
720	0.000506604
721	0.00050598
722	0.000510193
723	0.000508592
724	0.000494362
725	0.000482347
726	0.000483889
727	0.000478825
728	0.000470348
729	0.000457571
730	0.000447514
731	0.00044476
732	0.00044718
733	0.000451075
734	0.000454804
735	0.000465271
736	0.000489192
737	0.000493673
738	0.000494745
739	0.000497022
740	0.000503005
741	0.000511499
742	0.000517913
743	0.000520665
744	0.000522673
745	0.000524317
746	0.000524278
747	0.000525124
748	0.000526737
749	0.000531965
750	0.000534965
751	0.000537725
752	0.000538881
753	0.000536397
754	0.000519048
755	0.000506923
756	0.000527533
757	0.000536178
758	0.000542962
759	0.00054917
760	0.000554125
761	0.000558526
762	0.000563113
763	0.000566554
764	0.00056366
765	0.00055754
766	0.000559095
767	0.000555151
768	0.00054859
769	0.000546705
770	0.000544654
771	0.000545914
772	0.000563605
773	0.00057962
774	0.000581004
775	0.000583837
776	0.000589666
777	0.000593012
778	0.00059141
779	0.000588339
780	0.000583759
781	0.000584775
782	0.000588352
783	0.000591787
784	0.000599719
785	0.000608911
786	0.000614433
787	0.00061862
788	0.000622517
789	0.000622531
790	0.000620534
791	0.000620564
792	0.000620554
793	0.000620663
794	0.000622299
795	0.000625879
796	0.000629244
797	0.000630202
798	0.000628844
799	0.000618494
800	0.000623143
801	0.000632324
802	0.000635312
803	0.000635273
804	0.000635213
805	0.000635291
806	0.000634669
807	0.000633247
808	0.000629807
809	0.000621125
810	0.000624648
811	0.000631324
812	0.000633123
813	0.000634129
814	0.000636567
815	0.000636445
816	0.000635083
817	0.000629131
818	0.000624751
819	0.000612669
820	0.000589735
821	0.000583711
822	0.000575975
823	0.000557627
824	0.000563572
825	0.000570322
826	0.000581434
827	0.000592283
828	0.000590957
829	0.000585362
830	0.000579759
831	0.000573777
832	0.000568731
833	0.000564443
834	0.000560511
835	0.000558335
836	0.000557097
837	0.000555974
838	0.000554476
839	0.000551139
840	0.000542019
841	0.00053099
842	0.000522333
843	0.000521818
844	0.000520891
845	0.00051295
846	0.000505626
847	0.00049369
848	0.000475852
849	0.000465539
850	0.00046914
851	0.000469662
852	0.000463256
853	0.000457973
854	0.000452528
855	0.000441831
856	0.000423308
857	0.000417255
858	0.000415668
859	0.000415289
860	0.000414216
861	0.000420432
862	0.000422159
863	0.000423954
864	0.000422932
865	0.000426522
866	0.000435262
867	0.000443925
868	0.000451416
869	0.000457002
870	0.000460805
871	0.000461949
872	0.000459469
873	0.000455605
874	0.000459293
875	0.000465547
876	0.000470534
877	0.000473237
878	0.000473148
879	0.000473085
880	0.000472096
881	0.000468651
882	0.000468785
883	0.000469446
884	0.000464784
885	0.000466762
886	0.000495243
887	0.000501414
888	0.00050433
889	0.000499635
890	0.00046567
891	0.000505805
892	0.000526544
893	0.000531332
894	0.000536703
895	0.000537913
896	0.000543422
897	0.000545127
898	0.000545394
899	0.000542072
900	0.000534826
901	0.000527414
902	0.000507253
903	0.000507017
904	0.000509558
905	0.000515627
906	0.000522269
907	0.000533933
908	0.000547495
909	0.000553664
910	0.000556945
911	0.000540519
912	0.000518157
913	0.00052135
914	0.00048918
915	0.000388932
916	0.000310258
917	0.000388209
918	0.00049225
919	0.000501516
920	0.000495343
921	0.000499443
922	0.000486259
923	0.000459141
924	0.000468048
925	0.000485903
926	0.000468481
927	0.000466644
928	0.000477009
929	0.000474193
930	0.000471126
931	0.000472252
932	0.000474432
933	0.000474991
934	0.000475757
935	0.000462972
936	0.00045462
937	0.000455949
938	0.000460324
939	0.000481702
940	0.000496304
941	0.000500295
942	0.000495748
943	0.000489455
944	0.000481763
945	0.000464942
946	0.00044415
947	0.000432952
948	0.000433624
949	0.000430985
950	0.000449983
951	0.000509613
952	0.000533747
953	0.000535108
954	0.000527636
955	0.000507606
956	0.000478013
957	0.000440763
958	0.000413097
959	0.00040216
960	0.000392163
961	0.000405226
962	0.000461364
963	0.000503271
964	0.000506457
965	0.000495805
966	0.000481765
967	0.000456255
968	0.000447532
969	0.000452589
970	0.000445771
971	0.000435518
972	0.000428363
973	0.000422456
974	0.000420385
975	0.000421133
976	0.000420693
977	0.000417191
978	0.000408971
979	0.000414552
980	0.000422445
981	0.00042003
982	0.000416078
983	0.000411545
984	0.000406628
985	0.000390897
986	0.00037078
987	0.00037013
988	0.000370973
989	0.000370493
990	0.000370284
991	0.000367932
992	0.000362395
993	0.000353734
994	0.000343586
995	0.000335464
996	0.000330632
997	0.000328974
998	0.000331441
999	0.000331441
1000	0.000331288
1001	0.000328525
1002	0.000323708
1003	0.000322701
1004	0.00032959
1005	0.000338123
1006	0.00034437
1007	0.000348111
1008	0.000349596
1009	0.000347158
1010	0.000345238
1011	0.000344461
1012	0.000346292
1013	0.000346309
1014	0.000348016
1015	0.000350847
1016	0.000354141
1017	0.000359443
1018	0.000367266
1019	0.000369371
1020	0.000369415
1021	0.000370293
1022	0.000370273
1023	0.00036903
1024	0.000371159
1025	0.000378052
1026	0.000385117
1027	0.000390868
1028	0.000394003
1029	0.000398856
1030	0.000402526
1031	0.000401151
1032	0.000401497
1033	0.000404527
1034	0.000424184
1035	0.000445463
1036	0.000454723
1037	0.000456821
1038	0.000455087
1039	0.000449442
1040	0.000445457
1041	0.000436245
1042	0.000437952
1043	0.000428703
1044	0.000426218
1045	0.000440863
1046	0.000476488
1047	0.000499142
1048	0.000501234
1049	0.00049762
1050	0.000482789
1051	0.000472674
1052	0.000457907
1053	0.000423281
1054	0.000404222
1055	0.000413961
1056	0.000432632
1057	0.000452548
1058	0.000464621
1059	0.000466316
1060	0.000456213
1061	0.000432594
1062	0.000432106
1063	0.000458025
1064	0.000452268
1065	0.000438168
1066	0.000426403
1067	0.000418465
1068	0.000411249
1069	0.00040025
1070	0.000385267
1071	0.000389553
1072	0.000389453
1073	0.000388436
1074	0.000388078
1075	0.000385844
1076	0.000382196
1077	0.000378773
1078	0.000376196
1079	0.000363409
1080	0.000359771
1081	0.000362979
1082	0.000361859
1083	0.000361706
1084	0.000361153
1085	0.00036084
1086	0.000359234
1087	0.000355744
1088	0.00035983
1089	0.000359063
1090	0.000354234
1091	0.000349584
1092	0.000345841
1093	0.000336733
1094	0.000324499
1095	0.000322761
1096	0.000332225
1097	0.000337347
1098	0.000341067
1099	0.000344004
1100	0.000344585
1101	0.000344406
1102	0.000345468
1103	0.00035267
1104	0.000361092
1105	0.000369955
1106	0.000370589
1107	0.000354524
1108	0.000334267
1109	0.000341294
1110	0.000356135
1111	0.000354844
1112	0.000354138
1113	0.000355162
1114	0.000354929
1115	0.000352579
1116	0.000348668
1117	0.000342141
1118	0.000340222
1119	0.000333444
1120	0.000318829
1121	0.000317323
1122	0.000323733
1123	0.000333771
1124	0.000342641
1125	0.000345094
1126	0.000345726
1127	0.000348232
1128	0.000350928
1129	0.000354059
1130	0.000356923
1131	0.000358076
1132	0.000358957
1133	0.000359646
1134	0.000354134
1135	0.000347258
1136	0.00034641
1137	0.000346471
1138	0.000348137
1139	0.000350033
1140	0.000353687
1141	0.000356519
1142	0.000356227
1143	0.000353457
1144	0.00036272
1145	0.000380122
1146	0.000390384
1147	0.000387946
1148	0.000371261
1149	0.000351638
1150	0.00035967
1151	0.000358671
1152	0.000353004
1153	0.00034677
1154	0.000350772
1155	0.000357981
1156	0.000363297
1157	0.000364014
1158	0.000361283
1159	0.000358714
1160	0.000356566
1161	0.000349683
1162	0.000341117
1163	0.000323906
1164	0.000313801
1165	0.000314564
1166	0.000309372
1167	0.000305191
1168	0.000304002
1169	0.000299963
1170	0.00028826
1171	0.000269459
1172	0.000262968
1173	0.000274559
1174	0.000292847
1175	0.000320225
1176	0.000339246
1177	0.000347418
1178	0.000351154
1179	0.000353439
1180	0.000355055
1181	0.000356692
1182	0.00035773
1183	0.000357682
1184	0.000357514
1185	0.000357963
1186	0.000359923
1187	0.000361711
1188	0.000362075
1189	0.000360787
1190	0.000359928
1191	0.000359829
1192	0.000359813
1193	0.000361371
1194	0.00036474
1195	0.000369419
1196	0.000370517
1197	0.000370517
1198	0.000370495
1199	0.000370683
1200	0.00037223
1201	0.000373377
1202	0.000373377
1203	0.000372806
1204	0.000364779
1205	0.000360701
1206	0.000359638
1207	0.000358849
1208	0.000359276
1209	0.000359796
1210	0.000359255
1211	0.000357579
1212	0.000348243
1213	0.000336963
1214	0.000334743
1215	0.000340596
1216	0.000344491
1217	0.000346094
1218	0.000346638
1219	0.000346741
1220	0.000346642
1221	0.000344161
1222	0.000337184
1223	0.000324303
1224	0.000314748
1225	0.000319876
1226	0.000326543
1227	0.000326005
1228	0.000323762
1229	0.000320964
1230	0.000310848
1231	0.000297227
1232	0.00028998
1233	0.000282434
1234	0.000269645
1235	0.000272798
1236	0.0002596
1237	0.000220657
1238	0.000183332
1239	0.000163847
1240	0.000167055
1241	0.000162924
1242	0.000161056
1243	0.000172022
1244	0.000199566
1245	0.000200278
1246	0.000217626
1247	0.00025491
1248	0.000255249
1249	0.000258244
1250	0.0002618
1251	0.000245528
1252	0.000240157
1253	0.000256632
1254	0.000274412
1255	0.000275237
1256	0.000274507
1257	0.000269029
1258	0.000258747
1259	0.000255717
1260	0.000253358
1261	0.00023604
1262	0.000219949
1263	0.000208286
1264	0.000207699
1265	0.00021796
1266	0.000234478
1267	0.000242356
1268	0.000260829
1269	0.000279829
1270	0.000289329
1271	0.000293555
1272	0.000298176
1273	0.000298706
1274	0.000300199
1275	0.000301173
1276	0.000302235
1277	0.000305077
1278	0.000306602
1279	0.00030492
1280	0.000300675
1281	0.000299721
1282	0.000302099
1283	0.00030578
1284	0.00031258
1285	0.000316845
1286	0.000316889
1287	0.000316824
1288	0.000309671
1289	0.000307378
1290	0.000313823
1291	0.000315573
1292	0.0003171
1293	0.000317703
1294	0.00031796
1295	0.000318046
1296	0.000318144
1297	0.000318349
1298	0.000318332
1299	0.000305962
1300	0.000291603
1301	0.000281286
1302	0.000284908
1303	0.000290389
1304	0.000291591
1305	0.000297471
1306	0.00030474
1307	0.000307889
1308	0.000308938
1309	0.000307889
1310	0.00030423
1311	0.000300682
1312	0.000297909
1313	0.000296084
1314	0.000292914
1315	0.000289185
1316	0.000287799
1317	0.000289773
1318	0.000292753
1319	0.000294677
1320	0.000295428
1321	0.000294964
1322	0.000293684
1323	0.000292312
1324	0.000291356
1325	0.000290433
1326	0.000289607
1327	0.000288868
1328	0.000288224
1329	0.000287643
1330	0.000286861
1331	0.000285435
1332	0.000283977
1333	0.000281728
1334	0.000277713
1335	0.000277292
1336	0.000279122
1337	0.000279698
1338	0.000279221
1339	0.000276988
1340	0.000264932
1341	0.000267274
1342	0.000273901
1343	0.000275212
1344	0.000275499
1345	0.00027518
1346	0.000274094
1347	0.000273871
1348	0.000272283
1349	0.000266862
1350	0.000266763
1351	0.000266641
1352	0.000267421
1353	0.000268351
1354	0.000268642
1355	0.000268639
1356	0.000267778
1357	0.000253731
1358	0.00025177
1359	0.000255407
1360	0.000257433
1361	0.000265534
1362	0.000267385
1363	0.000267187
1364	0.000266554
1365	0.00026651
1366	0.000266462
1367	0.000265694
1368	0.000267501
1369	0.000269129
1370	0.000267802
1371	0.000268594
1372	0.000269134
1373	0.000268778
1374	0.000269139
1375	0.00026965
1376	0.000269513
1377	0.000269298
1378	0.00026766
1379	0.000261063
1380	0.000264259
1381	0.000270684
1382	0.000271579
1383	0.000271957
1384	0.000272368
1385	0.000273881
1386	0.000273196
1387	0.000274043
1388	0.000275398
1389	0.000275624
1390	0.000274833
1391	0.000273128
1392	0.000271475
1393	0.000267117
1394	0.000257131
1395	0.000251825
1396	0.000257615
1397	0.000243405
1398	0.000226439
1399	0.000244609
1400	0.000266314
1401	0.000270668
1402	0.00027632
1403	0.000275611
1404	0.000275033
1405	0.000274731
1406	0.000274339
1407	0.000273936
1408	0.000253809
1409	0.000245657
1410	0.000257534
1411	0.000259332
1412	0.000259956
1413	0.000260771
1414	0.000261472
1415	0.000262109
1416	0.000262807
1417	0.00026203
1418	0.000254607
1419	0.000254883
1420	0.00025626
1421	0.000258747
1422	0.000258578
1423	0.000258485
1424	0.000258232
1425	0.00025785
1426	0.000256944
1427	0.000255766
1428	0.000252883
1429	0.000252788
1430	0.000253886
1431	0.00025309
1432	0.000252871
1433	0.000252022
1434	0.00025197
1435	0.000253322
1436	0.000254298
1437	0.000255255
1438	0.000255905
1439	0.00025535
1440	0.000254719
1441	0.000255547
1442	0.000255471
1443	0.00025569
1444	0.00025628
1445	0.000257054
1446	0.000257609
1447	0.000257652
1448	0.000257426
1449	0.000257183
1450	0.000256812
1451	0.000256308
1452	0.000255919
1453	0.000255807
1454	0.000255507
1455	0.000253219
1456	0.00024952
1457	0.000246326
1458	0.000245888
1459	0.000248954
1460	0.000251179
1461	0.000252843
1462	0.00025351
1463	0.000253701
1464	0.000253621
1465	0.0002538
1466	0.000253969
1467	0.000253934
1468	0.000253373
1469	0.00025305
1470	0.00025437
1471	0.000254988
1472	0.000255012
1473	0.000255007
1474	0.000254906
1475	0.000254656
1476	0.000254373
1477	0.000253834
1478	0.000252929
1479	0.000251979
1480	0.000251004
1481	0.000249326
1482	0.000246787
1483	0.00024546
1484	0.000244831
1485	0.000243642
1486	0.000239528
1487	0.00023255
1488	0.000230299
1489	0.000231489
1490	0.000234336
1491	0.000237596
1492	0.000239079
1493	0.00023952
1494	0.000239229
1495	0.0002342
1496	0.000223279
1497	0.00021945
1498	0.000220517
1499	0.000222505
1500	0.000223958
1501	0.000226375
1502	0.000228696
1503	0.000231195
1504	0.000232324
1505	0.000231797
1506	0.000231311
1507	0.000230839
1508	0.000228998
1509	0.000228083
1510	0.00022911
1511	0.000230346
1512	0.000230072
1513	0.0002288
1514	0.000229901
1515	0.000231311
1516	0.000232319
1517	0.000234034
1518	0.00023565
1519	0.000236352
1520	0.000236852
1521	0.000236885
1522	0.000236166
1523	0.000236191
1524	0.000236033
1525	0.00023565
1526	0.000235792
1527	0.000235784
1528	0.000235784
1529	0.000235776
1530	0.000235793
1531	0.000235575
1532	0.000235133
1533	0.000235391
1534	0.000235289
1535	0.000235096
1536	0.000235137
1537	0.000235119
1538	0.000234764
1539	0.000234719
1540	0.000234812
1541	0.00023481
1542	0.000234809
1543	0.000234944
1544	0.00023526
1545	0.000235529
1546	0.000235877
1547	0.000236178
1548	0.000236344
1549	0.000236333
1550	0.000236341
1551	0.000236341
1552	0.000236341
1553	0.000236377
1554	0.000236592
1555	0.000237054
1556	0.000237678
1557	0.000238204
1558	0.000238463
1559	0.000238488
1560	0.000238488
1561	0.000238668
1562	0.000239115
1563	0.000239582
1564	0.000240079
1565	0.000239217
1566	0.000239456
1567	0.000238806
1568	0.000229262
1569	0.000217329
1570	0.000225242
1571	0.000234551
1572	0.000233898
1573	0.000230882
1574	0.000234031
1575	0.000236745
1576	0.000235465
1577	0.000228724
1578	0.000224991
1579	0.000230395
1580	0.000231279
1581	0.000233823
1582	0.00023509
1583	0.000235692
1584	0.000236475
1585	0.000231693
1586	0.00022875
1587	0.000230982
1588	0.000231759
1589	0.000233425
1590	0.000234086
1591	0.000235557
1592	0.000236663
1593	0.00023712
1594	0.00023716
1595	0.000237073
1596	0.000230884
1597	0.000227036
1598	0.000230596
1599	0.000231679
1600	0.000234034
1601	0.000234725
1602	0.000234378
1603	0.000232387
1604	0.00022995
1605	0.000228796
1606	0.000230628
1607	0.000231555
1608	0.000231057
1609	0.000230321
1610	0.000229292
1611	0.000229154
1612	0.000229543
1613	0.000229118
1614	0.000228686
1615	0.000228193
1616	0.000227573
1617	0.000226715
1618	0.000225077
1619	0.000223355
1620	0.000220749
1621	0.000216547
1622	0.000212968
1623	0.00021098
1624	0.000209824
1625	0.000208779
1626	0.000209935
1627	0.000209877
1628	0.000207977
1629	0.000209184
1630	0.000215368
1631	0.00022131
1632	0.000222059
1633	0.000222281
1634	0.000222203
1635	0.000220582
1636	0.000219342
1637	0.000221343
1638	0.000221642
1639	0.000221427
1640	0.000220293
1641	0.000215878
1642	0.000217403
1643	0.00021746
1644	0.000217334
1645	0.00021711
1646	0.000216144
1647	0.000216617
1648	0.000216557
1649	0.000215958
1650	0.000208453
1651	0.000204576
1652	0.000211365
1653	0.000213966
1654	0.000213653
1655	0.000212947
1656	0.000210772
1657	0.000211061
1658	0.000211781
1659	0.00021179
1660	0.000211598
1661	0.000210902
1662	0.000210549
1663	0.000210692
1664	0.000210762
1665	0.000210604
1666	0.000210024
1667	0.000209025
1668	0.000207935
1669	0.000205376
1670	0.00019852
1671	0.000195798
1672	0.000197817
1673	0.000199972
1674	0.000199897
1675	0.000199368
1676	0.000199871
1677	0.00019921
1678	0.000198461
1679	0.000197834
1680	0.000197132
1681	0.000195723
1682	0.000194622
1683	0.000191894
1684	0.000190773
1685	0.000190241
1686	0.000190013
1687	0.000189566
1688	0.000187936
1689	0.000183401
1690	0.000175327
1691	0.000165428
1692	0.00015362
1693	0.00014312
1694	0.000138924
1695	0.000138754
1696	0.000141456
1697	0.000137674
1698	0.000124264
1699	0.000110884
1700	0.000104059
1701	0.00010215
1702	0.00010526
1703	0.000112223
1704	0.000115685
1705	0.000120595
1706	0.00012635
1707	0.000125249
1708	0.000127853
1709	0.000132983
1710	0.000135828
1711	0.000139373
1712	0.000147162
1713	0.000149499
1714	0.00014806
1715	0.000146256
1716	0.000146661
1717	0.000147628
1718	0.000151595
1719	0.000160991
1720	0.000168621
1721	0.000174968
1722	0.000179195
1723	0.000181721
1724	0.000184055
1725	0.000186673
1726	0.000190679
1727	0.000194005
1728	0.00019641
1729	0.000197828
1730	0.000198767
1731	0.000198897
1732	0.000198442
1733	0.000197497
1734	0.00019671
1735	0.000196308
1736	0.000195989
1737	0.00019608
1738	0.000196473
1739	0.000196493
1740	0.000196028
1741	0.000195985
1742	0.000196893
1743	0.00019838
1744	0.000199885
1745	0.000200363
1746	0.000199553
1747	0.000198167
1748	0.000197726
1749	0.000198218
1750	0.000199017
1751	0.000199965
1752	0.00020078
1753	0.000201331
1754	0.000201998
1755	0.000202494
1756	0.000202692
1757	0.000202774
1758	0.000202845
1759	0.000202909
1760	0.000202944
1761	0.000202945
1762	0.000202935
1763	0.000202406
1764	0.000201382
1765	0.000200736
1766	0.000200026
1767	0.000198987
1768	0.000197486
1769	0.000195916
1770	0.000195083
1771	0.000194648
1772	0.000194114
1773	0.000194036
1774	0.000193969
1775	0.000193866
1776	0.00019366
1777	0.000193553
1778	0.000193413
1779	0.000193303
1780	0.000193254
1781	0.000193377
1782	0.000193683
1783	0.000193935
1784	0.000193304
1785	0.000193576
1786	0.000193565
1787	0.000193462
1788	0.000193222
1789	0.000190557
1790	0.000183074
1791	0.000181642
1792	0.000187422
1793	0.000191704
1794	0.000192183
1795	0.000192602
1796	0.000192587
1797	0.000192094
1798	0.000191698
1799	0.00019191
1800	0.000193194
1801	0.000194993
1802	0.000196687
1803	0.000196983
1804	0.000195838
1805	0.000195706
1806	0.000190807
1807	0.000187751
1808	0.00018755
1809	0.000188302
1810	0.000190818
1811	0.000194469
1812	0.00019432
1813	0.000195455
1814	0.000195444
1815	0.000195082
1816	0.000194521
1817	0.00019251
1818	0.000192669
1819	0.000194075
1820	0.000195709
1821	0.000196264
1822	0.000194538
1823	0.000195155
1824	0.000195331
1825	0.000195196
1826	0.000193911
1827	0.000192546
1828	0.000193173
1829	0.000194445
1830	0.000195226
1831	0.000195542
1832	0.000195469
1833	0.000195574
1834	0.000195463
1835	0.000195024
1836	0.000194829
1837	0.000194813
1838	0.000194565
1839	0.000194312
1840	0.000194088
1841	0.000194598
1842	0.000194585
1843	0.000194054
1844	0.000192128
1845	0.000188697
1846	0.000187326
1847	0.000186523
1848	0.000188223
1849	0.000192519
1850	0.000195144
1851	0.000196279
1852	0.000196167
1853	0.000194948
1854	0.000195455
1855	0.000195461
1856	0.000195657
1857	0.00019604
1858	0.000196498
1859	0.000196822
1860	0.000196868
1861	0.000196868
1862	0.000196868
1863	0.000196868
1864	0.000196673
1865	0.000196685
1866	0.000196867
1867	0.000196948
1868	0.00019675
1869	0.000196334
1870	0.000196591
1871	0.000196599
1872	0.000196599
1873	0.000196599
1874	0.000196599
1875	0.000196615
1876	0.000196738
1877	0.000196934
1878	0.000197055
1879	0.000197128
1880	0.000196926
1881	0.000195831
1882	0.000193269
1883	0.000193468
1884	0.000195365
1885	0.00019572
1886	0.000195927
1887	0.000195913
1888	0.00019576
1889	0.000195752
1890	0.000195499
1891	0.00019531
1892	0.000195299
1893	0.000194741
1894	0.000194465
1895	0.000194576
1896	0.000194958
1897	0.000195444
1898	0.000195692
1899	0.000195703
1900	0.000195638
1901	0.000195612
1902	0.000195548
1903	0.000195292
1904	0.000194014
1905	0.000193211
1906	0.000193785
1907	0.000193351
1908	0.000193209
1909	0.000193209
1910	0.000192142
1911	0.000183233
1912	0.0001759
1913	0.000172918
1914	0.000175135
1915	0.000183119
1916	0.000186788
1917	0.000187355
1918	0.000187328
1919	0.000187608
1920	0.000187276
1921	0.000184929
1922	0.000182007
1923	0.000184039
1924	0.000187627
1925	0.000187058
1926	0.000177299
1927	0.00017739
1928	0.00018432
1929	0.000184915
1930	0.000185048
1931	0.000185265
1932	0.000181306
1933	0.00017325
1934	0.000172177
1935	0.000178457
1936	0.000183132
1937	0.000183129
1938	0.000182907
1939	0.000179735
1940	0.00017739
1941	0.000178036
1942	0.000179456
1943	0.000179916
1944	0.000180065
1945	0.000179869
1946	0.000179764
1947	0.00017975
1948	0.000179641
1949	0.000178917
1950	0.00017771
1951	0.000177006
1952	0.000177283
1953	0.00017755
1954	0.000177764
1955	0.000177805
1956	0.000177805
1957	0.00017748
1958	0.000176401
1959	0.000175327
1960	0.000172955
1961	0.000168714
1962	0.000166309
1963	0.000165578
1964	0.000168826
1965	0.000173421
1966	0.000175112
1967	0.000175133
1968	0.000175081
1969	0.000175061
1970	0.000170971
1971	0.000172791
1972	0.000173168
1973	0.000173428
1974	0.000172017
1975	0.000172275
1976	0.000172309
1977	0.00017236
1978	0.000172469
1979	0.000172203
1980	0.00017228
1981	0.000172041
1982	0.000172235
1983	0.000172418
1984	0.000172418
1985	0.000172413
1986	0.000171222
1987	0.000168305
1988	0.000166031
1989	0.000167035
1990	0.000169725
1991	0.000170739
1992	0.000170889
1993	0.000167894
1994	0.000164069
1995	0.000164717
1996	0.000168125
1997	0.000169376
1998	0.000169821
[truncated: 11,177 more rows]

## Sheet: 329m Winter
Hours after model run started	Hours after injection	Tracer Concentration
0	0	0
1	1	0
2	2	0
3	3	0
4	4	0
5	5	0
6	6	0
7	7	0
8	8	0
9	9	0
10	10	0
11	11	0
12	12	0
13	13	0
14	14	0
15	15	0
16	16	0
17	17	0
18	18	7.96248e-37
19	19	2.42857e-29
20	20	6.83264e-30
21	21	3.83067e-31
22	22	1.22142e-23
23	23	3.09168e-21
24	24	2.94001e-21
25	25	1.57431e-17
26	26	1.89423e-14
27	27	1.26909e-10
28	28	5.05073e-09
29	29	3.71028e-08
30	30	7.38892e-08
31	31	6.36713e-08
32	32	6.16369e-08
33	33	6.61736e-08
34	34	7.34059e-08
35	35	8.77842e-08
36	36	1.0544e-07
37	37	1.4258e-07
38	38	2.0113e-07
39	39	3.0016e-07
40	40	5.87164e-07
41	41	1.35008e-06
42	42	2.92441e-06
43	43	5.54937e-06
44	44	9.40197e-06
45	45	1.32278e-05
46	46	1.59943e-05
47	47	1.58118e-05
48	48	1.29104e-05
49	49	1.07552e-05
50	50	8.97691e-06
51	51	7.2349e-06
52	52	5.98e-06
53	53	6.26226e-06
54	54	9.05292e-06
55	55	1.37881e-05
56	56	1.97674e-05
57	57	2.75215e-05
58	58	3.51862e-05
59	59	3.95611e-05
60	60	4.10944e-05
61	61	4.05365e-05
62	62	4.04483e-05
63	63	4.15645e-05
64	64	4.31078e-05
65	65	4.50216e-05
66	66	4.6577e-05
67	67	4.79259e-05
68	68	4.89878e-05
69	69	4.98361e-05
70	70	5.05941e-05
71	71	5.12996e-05
72	72	5.17603e-05
73	73	5.16187e-05
74	74	5.05681e-05
75	75	4.8512e-05
76	76	4.57901e-05
77	77	4.35365e-05
78	78	4.28747e-05
79	79	4.19921e-05
80	80	4.06717e-05
81	81	3.97118e-05
82	82	3.89893e-05
83	83	3.76711e-05
84	84	3.55768e-05
85	85	3.12564e-05
86	86	2.40831e-05
87	87	1.92538e-05
88	88	1.66273e-05
89	89	1.46629e-05
90	90	1.35135e-05
91	91	1.38047e-05
92	92	1.7065e-05
93	93	5.12797e-05
94	94	9.86215e-05
95	95	0.000125925
96	96	0.000137124
97	97	0.000139803
98	98	0.000145169
99	99	0.000161937
100	100	0.000167461
101	101	0.000164681
102	102	0.000157796
103	103	0.00015508
104	104	0.000155517
105	105	0.000148848
106	106	0.000132893
107	107	0.000116479
108	108	0.000103201
109	109	9.59183e-05
110	110	9.23599e-05
111	111	9.14225e-05
112	112	9.08163e-05
113	113	9.10029e-05
114	114	9.08649e-05
115	115	9.02534e-05
116	116	8.96868e-05
117	117	9.81312e-05
118	118	0.000118333
119	119	0.00013455
120	120	0.000144214
121	121	0.00015018
122	122	0.000154884
123	123	0.000154883
124	124	0.000146515
125	125	0.000133158
126	126	0.000120258
127	127	0.000109851
128	128	0.000100708
129	129	9.2904e-05
130	130	8.69445e-05
131	131	8.27088e-05
132	132	8.00565e-05
133	133	7.84899e-05
134	134	7.71152e-05
135	135	7.64535e-05
136	136	7.64533e-05
137	137	7.69046e-05
138	138	7.75853e-05
139	139	7.83817e-05
140	140	7.9292e-05
141	141	7.97039e-05
142	142	8.266e-05
143	143	9.51759e-05
144	144	0.000112143
145	145	0.00012273
146	146	0.000126707
147	147	0.000128646
148	148	0.000128259
149	149	0.000122719
150	150	0.000114485
151	151	0.000105679
152	152	9.91335e-05
153	153	9.54282e-05
154	154	9.30852e-05
155	155	9.13476e-05
156	156	8.91103e-05
157	157	8.6562e-05
158	158	8.41064e-05
159	159	8.12048e-05
160	160	7.83783e-05
161	161	7.50728e-05
162	162	7.14425e-05
163	163	6.93545e-05
164	164	7.58754e-05
165	165	8.86717e-05
166	166	0.000100075
167	167	0.000108673
168	168	0.000112205
169	169	0.000112115
170	170	0.000109827
171	171	0.000106462
172	172	0.000102658
173	173	9.87393e-05
174	174	9.62197e-05
175	175	9.41164e-05
176	176	9.14263e-05
177	177	8.83697e-05
178	178	8.59039e-05
179	179	8.53038e-05
180	180	8.69865e-05
181	181	9.08144e-05
182	182	9.81991e-05
183	183	0.000105078
184	184	0.000109936
185	185	0.000113419
186	186	0.000115127
187	187	0.000115161
188	188	0.000114002
189	189	0.000112869
190	190	0.000112361
191	191	0.00011226
192	192	0.000113622
193	193	0.000118198
194	194	0.000121423
195	195	0.000123805
196	196	0.000126429
197	197	0.000126286
198	198	0.00012786
199	199	0.000127932
200	200	0.000124907
201	201	0.000118827
202	202	0.000112832
203	203	0.00010843
204	204	0.000105264
205	205	0.000102589
206	206	9.99519e-05
207	207	9.7992e-05
208	208	9.639e-05
209	209	9.45429e-05
210	210	9.2654e-05
211	211	9.12069e-05
212	212	9.01968e-05
213	213	8.77482e-05
214	214	8.54819e-05
215	215	8.50546e-05
216	216	9.14236e-05
217	217	0.000101236
218	218	0.000108277
219	219	0.00011876
220	220	0.000152467
221	221	0.000202253
222	222	0.000222347
223	223	0.000198662
224	224	0.000158959
225	225	0.00012112
226	226	0.00010583
227	227	0.000100326
228	228	9.81746e-05
229	229	9.76846e-05
230	230	9.67392e-05
231	231	9.65209e-05
232	232	9.80288e-05
233	233	0.000102285
234	234	0.000108371
235	235	0.000114548
236	236	0.000124652
237	237	0.000134735
238	238	0.000140096
239	239	0.00014383
240	240	0.000144624
241	241	0.000142345
242	242	0.000139529
243	243	0.000136208
244	244	0.00013091
245	245	0.000121637
246	246	0.000111869
247	247	0.000109529
248	248	0.000118321
249	249	0.000129271
250	250	0.000133748
251	251	0.00013624
252	252	0.000138737
253	253	0.000141991
254	254	0.000147183
255	255	0.00015132
256	256	0.000154231
257	257	0.00015573
258	258	0.000156227
259	259	0.000155878
260	260	0.00015406
261	261	0.000153032
262	262	0.000158415
263	263	0.000166386
264	264	0.000172765
265	265	0.000177901
266	266	0.000180296
267	267	0.00018173
268	268	0.000186605
269	269	0.000193047
270	270	0.00019634
271	271	0.000200436
272	272	0.000205659
273	273	0.000209838
274	274	0.000216794
275	275	0.000222486
276	276	0.000226074
277	277	0.000229511
278	278	0.000231993
279	279	0.000232684
280	280	0.000232459
281	281	0.000232629
282	282	0.000233282
283	283	0.000232867
284	284	0.000233006
285	285	0.000236103
286	286	0.000244592
287	287	0.000275403
288	288	0.000279633
289	289	0.000276764
290	290	0.000275028
291	291	0.000273633
292	292	0.000271772
293	293	0.000269658
294	294	0.00026715
295	295	0.000264075
296	296	0.000261346
297	297	0.000259522
298	298	0.000258327
299	299	0.000257619
300	300	0.000256245
301	301	0.000254795
302	302	0.000254053
303	303	0.000253501
304	304	0.00025286
305	305	0.000252168
306	306	0.000251432
307	307	0.00025071
308	308	0.000250329
309	309	0.000250402
310	310	0.000250568
311	311	0.000249993
312	312	0.000248636
313	313	0.000246533
314	314	0.000243484
315	315	0.000239419
316	316	0.000235254
317	317	0.000231521
318	318	0.000228056
319	319	0.000224113
320	320	0.000221495
321	321	0.000219198
322	322	0.000217217
323	323	0.000215561
324	324	0.000214484
325	325	0.000213952
326	326	0.000213752
327	327	0.000213767
328	328	0.000213768
329	329	0.000213553
330	330	0.00021316
331	331	0.00021278
332	332	0.000212589
333	333	0.00021286
334	334	0.000213305
335	335	0.000211627
336	336	0.000202881
337	337	0.000196224
338	338	0.000191883
339	339	0.000188393
340	340	0.000184806
341	341	0.000180349
342	342	0.000176085
343	343	0.000174798
344	344	0.000176204
345	345	0.000177981
346	346	0.000177931
347	347	0.000176266
348	348	0.000172635
349	349	0.000166585
350	350	0.000159159
351	351	0.000152891
352	352	0.000147083
353	353	0.000142162
354	354	0.000137786
355	355	0.000133352
356	356	0.000129291
357	357	0.000125078
358	358	0.000118215
359	359	0.000105816
360	360	0.000108106
361	361	0.000120739
362	362	0.000125592
363	363	0.000123892
364	364	0.000121667
365	365	0.000120217
366	366	0.000120006
367	367	0.000120348
368	368	0.000120846
369	369	0.000121178
370	370	0.000121233
371	371	0.000121221
372	372	0.000121281
373	373	0.000121691
374	374	0.000121952
375	375	0.000122328
376	376	0.000122752
377	377	0.000123265
378	378	0.000124031
379	379	0.000125119
380	380	0.000126545
381	381	0.000128003
382	382	0.000129614
383	383	0.000131019
384	384	0.000133348
385	385	0.00013709
386	386	0.000141
387	387	0.000141605
388	388	0.000141271
389	389	0.00014024
390	390	0.000137216
391	391	0.00013378
392	392	0.0001325
393	393	0.000132061
394	394	0.000131895
395	395	0.000131903
396	396	0.000131951
397	397	0.000132033
398	398	0.000132147
399	399	0.000132343
400	400	0.000132463
401	401	0.000132475
402	402	0.000132455
403	403	0.000132439
404	404	0.000132546
405	405	0.000132646
406	406	0.00013276
407	407	0.000132963
408	408	0.000133406
409	409	0.000134063
410	410	0.000134834
411	411	0.000135648
412	412	0.000136472
413	413	0.000137254
414	414	0.000137999
415	415	0.000138484
416	416	0.000138794
417	417	0.00013897
418	418	0.000139056
419	419	0.000139091
420	420	0.000139165
421	421	0.000139243
422	422	0.000139386
423	423	0.000139668
424	424	0.000140105
425	425	0.000140612
426	426	0.0001411
427	427	0.000141528
428	428	0.000141914
429	429	0.000142277
430	430	0.000142563
431	431	0.00014275
432	432	0.000142832
433	433	0.000142835
434	434	0.000142839
435	435	0.000142906
436	436	0.000143026
437	437	0.000143323
438	438	0.000143806
439	439	0.000144313
440	440	0.00014488
441	441	0.000145461
442	442	0.000143817
443	443	0.000138002
444	444	0.000124682
445	445	0.000124976
446	446	0.000127297
447	447	0.000129401
448	448	0.000131454
449	449	0.000131909
450	450	0.000131565
451	451	0.000131858
452	452	0.00013216
453	453	0.000132272
454	454	0.000131793
455	455	0.000130621
456	456	0.000129168
457	457	0.000128092
458	458	0.000127786
459	459	0.000128794
460	460	0.000131482
461	461	0.000136051
462	462	0.000130699
463	463	0.000125629
464	464	0.000122616
465	465	0.000122582
466	466	0.000123199
467	467	0.000123973
468	468	0.000126015
469	469	0.000128306
470	470	0.00012983
471	471	0.000130653
472	472	0.000130977
473	473	0.000130921
474	474	0.000130545
475	475	0.000129919
476	476	0.000129247
477	477	0.000128511
478	478	0.000128185
479	479	0.000128068
480	480	0.000127232
481	481	0.000126303
482	482	0.000125946
483	483	0.000126187
484	484	0.000126909
485	485	0.000127925
486	486	0.000128908
487	487	0.000129674
488	488	0.000130181
489	489	0.000130391
490	490	0.000130139
491	491	0.000129291
492	492	0.000128139
493	493	0.00012717
494	494	0.000126545
495	495	0.000126128
496	496	0.000125711
497	497	0.000125134
498	498	0.000124367
499	499	0.000123572
500	500	0.000122929
501	501	0.000122501
502	502	0.00012224
503	503	0.000122089
504	504	0.000122002
505	505	0.000121912
506	506	0.000121743
507	507	0.000121458
508	508	0.000121121
509	509	0.000120851
510	510	0.000120734
511	511	0.000120854
512	512	0.000121481
513	513	0.000122569
514	514	0.000123089
515	515	0.00012325
516	516	0.000123991
517	517	0.000125476
518	518	0.000127159
519	519	0.000127064
520	520	0.000124251
521	521	0.000119941
522	522	0.000114313
523	523	0.000112015
524	524	0.000117557
525	525	0.000116824
526	526	0.000114363
527	527	0.000114421
528	528	0.000114415
529	529	0.000114331
530	530	0.000114195
531	531	0.00011403
532	532	0.000113859
533	533	0.000113713
534	534	0.000113732
535	535	0.000113768
536	536	0.000113619
537	537	0.000113288
538	538	0.000112962
539	539	0.000112743
540	540	0.000112634
541	541	0.000112609
542	542	0.000112633
543	543	0.000112792
544	544	0.000113311
545	545	0.000113819
546	546	0.000114078
547	547	0.000114332
548	548	0.000114639
549	549	0.000114687
550	550	0.0001147
551	551	0.000115047
552	552	0.00011535
553	553	0.000115688
554	554	0.000116033
555	555	0.000116615
556	556	0.000117026
557	557	0.000117108
558	558	0.000117192
559	559	0.000117161
560	560	0.000116951
561	561	0.000116836
562	562	0.000116819
563	563	0.000116777
564	564	0.000116714
565	565	0.000116617
566	566	0.000116503
567	567	0.000116184
568	568	0.000115798
569	569	0.000115356
570	570	0.000114961
571	571	0.000114747
572	572	0.000114795
573	573	0.00011522
574	574	0.000115566
575	575	0.000115292
576	576	0.000114546
577	577	0.00011398
578	578	0.000113961
579	579	0.000114658
580	580	0.000115146
581	581	0.000115276
582	582	0.00011516
583	583	0.000114913
584	584	0.000114569
585	585	0.000114197
586	586	0.000113889
587	587	0.000113727
588	588	0.000113706
589	589	0.000113903
590	590	0.000114355
591	591	0.000114995
592	592	0.000115609
593	593	0.000116077
594	594	0.000116331
595	595	0.000116255
596	596	0.000115986
597	597	0.000115452
598	598	0.000115551
599	599	0.000119438
600	600	0.0001218
601	601	0.000122061
602	602	0.000121643
603	603	0.000120014
604	604	0.000118866
605	605	0.000118932
606	606	0.000118575
607	607	0.000118126
608	608	0.000117636
609	609	0.000117105
610	610	0.000116648
611	611	0.000116487
612	612	0.000116419
613	613	0.000116061
614	614	0.000115523
615	615	0.000115108
616	616	0.000114784
617	617	0.000114466
618	618	0.000114276
619	619	0.000114157
620	620	0.000114104
621	621	0.000114103
622	622	0.000114079
623	623	0.000113729
624	624	0.000113277
625	625	0.000112834
626	626	0.000112407
627	627	0.000111638
628	628	0.0001106
629	629	0.000108619
630	630	0.000106241
631	631	0.000104336
632	632	0.000102934
633	633	0.000101907
634	634	0.000101125
635	635	0.000100367
636	636	0.000100261
637	637	0.000100884
638	638	0.000101511
639	639	0.000102074
640	640	0.00010291
641	641	0.000104017
642	642	0.000104964
643	643	0.00010553
644	644	0.000105679
645	645	0.000105673
646	646	0.000105868
647	647	0.000106753
648	648	0.000108366
649	649	0.000109875
650	650	0.000110462
651	651	0.00011075
652	652	0.000112524
653	653	0.000114239
654	654	0.00011539
655	655	0.000116087
656	656	0.000116566
657	657	0.00011694
658	658	0.000117257
659	659	0.000117552
660	660	0.000117843
661	661	0.000118122
662	662	0.000118385
663	663	0.000118613
664	664	0.000118809
665	665	0.000118954
666	666	0.000119042
667	667	0.000119078
668	668	0.000119091
669	669	0.000118814
670	670	0.000117832
671	671	0.000116319
672	672	0.000115526
673	673	0.000115237
674	674	0.000115061
675	675	0.000115017
676	676	0.000115043
677	677	0.00011532
678	678	0.000115617
679	679	0.000115982
680	680	0.000116466
681	681	0.000117059
682	682	0.000117713
683	683	0.000118409
684	684	0.000119244
685	685	0.000119838
686	686	0.000120268
687	687	0.000120609
688	688	0.000120976
689	689	0.00012133
690	690	0.000121636
691	691	0.000121911
692	692	0.000122147
693	693	0.000122323
694	694	0.000122492
695	695	0.000122802
696	696	0.000123511
697	697	0.000124579
698	698	0.000125654
699	699	0.000126459
700	700	0.000127001
701	701	0.000127429
702	702	0.000127775
703	703	0.000128076
704	704	0.000128392
705	705	0.000128794
706	706	0.000129104
707	707	0.000129378
708	708	0.000129656
709	709	0.000129927
710	710	0.000130174
711	711	0.000130267
712	712	0.000129637
713	713	0.000128027
714	714	0.000126826
715	715	0.000125783
716	716	0.000125501
717	717	0.000125032
718	718	0.000124744
719	719	0.000124261
720	720	0.000123495
721	721	0.0001234
722	722	0.000123988
723	723	0.00012506
724	724	0.000126411
725	725	0.000127177
726	726	0.000127607
727	727	0.000127837
728	728	0.000127531
729	729	0.000126711
730	730	0.000126753
731	731	0.000127069
732	732	0.00012718
733	733	0.000127171
734	734	0.000126648
735	735	0.000124934
736	736	0.000123036
737	737	0.000121561
738	738	0.0001206
739	739	0.000120416
740	740	0.000121615
741	741	0.000122732
742	742	0.000123163
743	743	0.000123556
744	744	0.000123408
745	745	0.000122942
746	746	0.000123506
747	747	0.00012456
748	748	0.000123701
749	749	0.000123209
750	750	0.000123635
751	751	0.00012353
752	752	0.00012147
753	753	0.000120473
754	754	0.000120896
755	755	0.000122067
756	756	0.000123559
757	757	0.000123953
758	758	0.000123975
759	759	0.000123857
760	760	0.000123888
761	761	0.000124173
762	762	0.000124599
763	763	0.000124993
764	764	0.000125052
765	765	0.000125009
766	766	0.000124929
767	767	0.000124445
768	768	0.000123582
769	769	0.000123025
770	770	0.0001231
771	771	0.0001234
772	772	0.000123371
773	773	0.000123202
774	774	0.00012351
775	775	0.000123793
776	776	0.000124089
777	777	0.000124312
778	778	0.000124561
779	779	0.000124957
780	780	0.000125532
781	781	0.000126218
782	782	0.00012682
783	783	0.000127539
784	784	0.000127767
785	785	0.000126933
786	786	0.000126677
787	787	0.000126765
788	788	0.00012708
789	789	0.000127227
790	790	0.000127631
791	791	0.000128402
792	792	0.000128613
793	793	0.000128366
794	794	0.000127858
795	795	0.000127494
796	796	0.000127378
797	797	0.000127247
798	798	0.000127135
799	799	0.00012709
800	800	0.000127253
801	801	0.000127305
802	802	0.00012714
803	803	0.0001269
804	804	0.000126744
805	805	0.000126792
806	806	0.00012692
807	807	0.000127042
808	808	0.000127156
809	809	0.000127295
810	810	0.000127412
811	811	0.000127569
812	812	0.00012771
813	813	0.000127795
814	814	0.000127807
815	815	0.000127754
816	816	0.000127522
817	817	0.000127209
818	818	0.000127843
819	819	0.000128292
820	820	0.000128304
821	821	0.000128296
822	822	0.000128343
823	823	0.000128344
824	824	0.000128044
825	825	0.000127378
826	826	0.000126595
827	827	0.000126032
828	828	0.000125799
829	829	0.000125712
830	830	0.000125601
831	831	0.000125452
832	832	0.000125273
833	833	0.000125092
834	834	0.000124918
835	835	0.000124754
836	836	0.000124625
837	837	0.000124552
838	838	0.000124508
839	839	0.000124468
840	840	0.000124434
841	841	0.00012437
842	842	0.000124158
843	843	0.000123488
844	844	0.000122443
845	845	0.000121889
846	846	0.000121662
847	847	0.000121663
848	848	0.000121827
849	849	0.000122012
850	850	0.000122165
851	851	0.000122264
852	852	0.000122207
853	853	0.000122011
854	854	0.000121876
855	855	0.000121849
856	856	0.000121811
857	857	0.000122099
858	858	0.000124051
859	859	0.000125358
860	860	0.000124791
861	861	0.000123318
862	862	0.000122008
863	863	0.000121899
864	864	0.000121939
865	865	0.000121971
866	866	0.000121946
867	867	0.000121876
868	868	0.000121808
869	869	0.000121781
870	870	0.000121776
871	871	0.000121808
872	872	0.000121899
873	873	0.000122038
874	874	0.000122154
875	875	0.000122209
876	876	0.000122185
877	877	0.00012211
878	878	0.000122034
879	879	0.000121984
880	880	0.000121976
881	881	0.000122042
882	882	0.000122238
883	883	0.000122627
884	884	0.000123391
885	885	0.000124922
886	886	0.00012431
887	887	0.000122765
888	888	0.00012276
889	889	0.000123122
890	890	0.000123198
891	891	0.000123174
892	892	0.00012315
893	893	0.000123149
894	894	0.000123022
895	895	0.000122716
896	896	0.000122321
897	897	0.000122029
898	898	0.00012197
899	899	0.000122114
900	900	0.000122542
901	901	0.000122883
902	902	0.000123012
903	903	0.00012301
904	904	0.000122893
905	905	0.000122572
906	906	0.000122436
907	907	0.000122451
908	908	0.000122458
909	909	0.00012248
910	910	0.000122489
911	911	0.000122513
912	912	0.00012256
913	913	0.000122688
914	914	0.000123151
915	915	0.000122221
916	916	0.000122086
917	917	0.000122053
918	918	0.000121953
919	919	0.000121838
920	920	0.000121699
921	921	0.000122066
922	922	0.000122635
923	923	0.000122751
924	924	0.000122632
925	925	0.000122505
926	926	0.000122442
927	927	0.000121681
928	928	0.000119915
929	929	0.00011908
930	930	0.00011858
931	931	0.000118616
932	932	0.000117107
933	933	0.000116979
934	934	0.000117157
935	935	0.000117446
936	936	0.000117666
937	937	0.000117948
938	938	0.000118019
939	939	0.00011807
940	940	0.000118099
941	941	0.000118072
942	942	0.000118011
943	943	0.000117937
944	944	0.000117849
945	945	0.000117733
946	946	0.000117605
947	947	0.000117507
948	948	0.000117438
949	949	0.000117399
950	950	0.000117375
951	951	0.00011736
952	952	0.000117359
953	953	0.000117367
954	954	0.000117378
955	955	0.000117384
956	956	0.000117391
957	957	0.000117398
958	958	0.000117417
959	959	0.000117463
960	960	0.000117538
961	961	0.000117615
962	962	0.000117708
963	963	0.000117773
964	964	0.000117827
965	965	0.000117875
966	966	0.000117886
967	967	0.000117846
968	968	0.000117884
969	969	0.000118438
970	970	0.00011942
971	971	0.000120121
972	972	0.000120439
973	973	0.000120626
974	974	0.000120788
975	975	0.000120922
976	976	0.00012101
977	977	0.000120991
978	978	0.00012079
979	979	0.000120527
980	980	0.000120352
981	981	0.000120245
982	982	0.000120158
983	983	0.000120133
984	984	0.000120028
985	985	0.000119455
986	986	0.000119256
987	987	0.000119375
988	988	0.000119479
989	989	0.000119515
990	990	0.000119553
991	991	0.00011959
992	992	0.000119754
993	993	0.000119859
994	994	0.000119973
995	995	0.00012011
996	996	0.000120254
997	997	0.000120422
998	998	0.000120573
999	999	0.000120681
1000	1000	0.000120754
1001	1001	0.000120805
1002	1002	0.000120851
1003	1003	0.000120903
1004	1004	0.000120926
1005	1005	0.000120923
1006	1006	0.000120894
1007	1007	0.00012088
1008	1008	0.000120904
1009	1009	0.000120942
1010	1010	0.000121006
1011	1011	0.000121116
1012	1012	0.000121251
1013	1013	0.000121383
1014	1014	0.000121495
1015	1015	0.000121578
1016	1016	0.000121668
1017	1017	0.000121776
1018	1018	0.000121927
1019	1019	0.000122135
1020	1020	0.000122365
1021	1021	0.000122583
1022	1022	0.0001228
1023	1023	0.000123077
1024	1024	0.000123375
1025	1025	0.000123582
1026	1026	0.000123628
1027	1027	0.00012362
1028	1028	0.000123567
1029	1029	0.000123243
1030	1030	0.000122749
1031	1031	0.000122515
1032	1032	0.000122519
1033	1033	0.00012258
1034	1034	0.000122633
1035	1035	0.000122676
1036	1036	0.000122715
1037	1037	0.000122746
1038	1038	0.000122764
1039	1039	0.000122769
1040	1040	0.000122765
1041	1041	0.000122755
1042	1042	0.000122746
1043	1043	0.000122739
1044	1044	0.000122737
1045	1045	0.000122733
1046	1046	0.000122719
1047	1047	0.000122697
1048	1048	0.000122676
1049	1049	0.000122665
1050	1050	0.000122676
1051	1051	0.000122708
1052	1052	0.000122755
1053	1053	0.000122806
1054	1054	0.000122866
1055	1055	0.00012294
1056	1056	0.000123013
1057	1057	0.000123079
1058	1058	0.000123187
1059	1059	0.000123372
1060	1060	0.000123522
1061	1061	0.000123602
1062	1062	0.000123637
1063	1063	0.000123678
1064	1064	0.000123871
1065	1065	0.000124198
1066	1066	0.00012444
1067	1067	0.000124585
1068	1068	0.000124698
1069	1069	0.000124866
1070	1070	0.000125104
1071	1071	0.000125276
1072	1072	0.000125275
1073	1073	0.000125148
1074	1074	0.00012487
1075	1075	0.000124561
1076	1076	0.000124299
1077	1077	0.000124156
1078	1078	0.000124162
1079	1079	0.000124275
1080	1080	0.000124444
1081	1081	0.000124627
1082	1082	0.000124769
1083	1083	0.000124729
1084	1084	0.000124379
1085	1085	0.00012372
1086	1086	0.000123289
1087	1087	0.000122933
1088	1088	0.000122826
1089	1089	0.000122967
1090	1090	0.000123203
1091	1091	0.000123373
1092	1092	0.000123557
1093	1093	0.000123722
1094	1094	0.000123813
1095	1095	0.000123763
1096	1096	0.000123574
1097	1097	0.000123284
1098	1098	0.000123009
1099	1099	0.000122827
1100	1100	0.00012275
1101	1101	0.000122778
1102	1102	0.000122837
1103	1103	0.000122992
1104	1104	0.0001232
1105	1105	0.000123281
1106	1106	0.00012319
1107	1107	0.000123355
1108	1108	0.000123827
1109	1109	0.00012507
1110	1110	0.000125984
1111	1111	0.000125437
1112	1112	0.000124498
1113	1113	0.000124054
1114	1114	0.000124236
1115	1115	0.000124487
1116	1116	0.0001245
1117	1117	0.000124563
1118	1118	0.000124436
1119	1119	0.00012484
1120	1120	0.000125082
1121	1121	0.000125674
1122	1122	0.000126515
1123	1123	0.000127028
1124	1124	0.000126695
1125	1125	0.000125431
1126	1126	0.000123765
1127	1127	0.000122044
1128	1128	0.000120145
1129	1129	0.000117699
1130	1130	0.000116731
1131	1131	0.000117493
1132	1132	0.000118778
1133	1133	0.000119804
1134	1134	0.000119867
1135	1135	0.00011941
1136	1136	0.000118806
1137	1137	0.000118271
1138	1138	0.000117378
1139	1139	0.000115959
1140	1140	0.0001142
1141	1141	0.000112378
1142	1142	0.000110452
1143	1143	0.000108821
1144	1144	0.000107401
1145	1145	0.00010634
1146	1146	0.000105762
1147	1147	0.000105618
1148	1148	0.000105692
1149	1149	0.000105749
1150	1150	0.000105823
1151	1151	0.000105992
1152	1152	0.000106661
1153	1153	0.00010766
1154	1154	0.000108809
1155	1155	0.000109982
1156	1156	0.000110782
1157	1157	0.000111272
1158	1158	0.000111353
1159	1159	0.000111041
1160	1160	0.000111049
1161	1161	0.000111433
1162	1162	0.000111875
1163	1163	0.000112147
1164	1164	0.000112289
1165	1165	0.000112253
1166	1166	0.000112304
1167	1167	0.000112546
1168	1168	0.000112811
1169	1169	0.00011294
1170	1170	0.000112798
1171	1171	0.0001125
1172	1172	0.000112343
1173	1173	0.000112312
1174	1174	0.00011246
1175	1175	0.000112673
1176	1176	0.00011286
1177	1177	0.000112898
1178	1178	0.000112245
1179	1179	0.000112233
1180	1180	0.000113816
1181	1181	0.000114276
1182	1182	0.000113999
1183	1183	0.000113955
1184	1184	0.000113873
1185	1185	0.000113669
1186	1186	0.000113518
1187	1187	0.000113493
1188	1188	0.00011352
1189	1189	0.000113575
1190	1190	0.000113466
1191	1191	0.000112878
1192	1192	0.000111911
1193	1193	0.000110696
1194	1194	0.000109495
1195	1195	0.000108346
1196	1196	0.000107625
1197	1197	0.000107503
1198	1198	0.000107542
1199	1199	0.000107657
1200	1200	0.000107935
1201	1201	0.00010833
1202	1202	0.000108735
1203	1203	0.000109093
1204	1204	0.000109359
1205	1205	0.000109482
1206	1206	0.00010951
1207	1207	0.000109378
1208	1208	0.000108947
1209	1209	0.000108951
1210	1210	0.000110565
1211	1211	0.000111463
1212	1212	0.000111348
1213	1213	0.000111081
1214	1214	0.000111168
1215	1215	0.000111615
1216	1216	0.000112396
1217	1217	0.000113234
1218	1218	0.000113988
1219	1219	0.000114692
1220	1220	0.000115421
1221	1221	0.000116113
1222	1222	0.000116733
1223	1223	0.000117293
1224	1224	0.000117821
1225	1225	0.000118106
1226	1226	0.00011825
1227	1227	0.00011832
1228	1228	0.000118344
1229	1229	0.000118376
1230	1230	0.000118392
1231	1231	0.000118285
1232	1232	0.000117937
1233	1233	0.000117577
1234	1234	0.000117379
1235	1235	0.000117425
1236	1236	0.000117743
1237	1237	0.000118215
1238	1238	0.000118586
1239	1239	0.000118762
1240	1240	0.000118839
1241	1241	0.000118866
1242	1242	0.000118842
1243	1243	0.000118741
1244	1244	0.000118528
1245	1245	0.000118118
1246	1246	0.000117466
1247	1247	0.0001167
1248	1248	0.000116119
1249	1249	0.000115639
1250	1250	0.000115289
1251	1251	0.000115177
1252	1252	0.000115349
1253	1253	0.000115741
1254	1254	0.00011593
1255	1255	0.000116075
1256	1256	0.000116106
1257	1257	0.000116088
1258	1258	0.000116064
1259	1259	0.000116029
1260	1260	0.000116016
1261	1261	0.000115987
1262	1262	0.000116033
1263	1263	0.000116175
1264	1264	0.000116285
1265	1265	0.00011634
1266	1266	0.000116362
1267	1267	0.000116305
1268	1268	0.000116215
1269	1269	0.00011612
1270	1270	0.000116036
1271	1271	0.000115968
1272	1272	0.000115914
1273	1273	0.000115867
1274	1274	0.000115821
1275	1275	0.000115801
1276	1276	0.000115808
1277	1277	0.000115815
1278	1278	0.00011581
1279	1279	0.00011577
1280	1280	0.000115692
1281	1281	0.000115708
1282	1282	0.000115761
1283	1283	0.000115635
1284	1284	0.000115404
1285	1285	0.000115049
1286	1286	0.000114692
1287	1287	0.000114428
1288	1288	0.000114279
1289	1289	0.000114167
1290	1290	0.000114086
1291	1291	0.000113951
1292	1292	0.00011371
1293	1293	0.000113322
1294	1294	0.000112869
1295	1295	0.000112468
1296	1296	0.000112146
1297	1297	0.00011195
1298	1298	0.000111836
1299	1299	0.000111681
1300	1300	0.000111498
1301	1301	0.00011117
1302	1302	0.000110788
1303	1303	0.000110628
1304	1304	0.000110556
1305	1305	0.000110602
1306	1306	0.000110809
1307	1307	0.000111095
1308	1308	0.000111364
1309	1309	0.000111624
1310	1310	0.00011185
1311	1311	0.000112114
1312	1312	0.000112487
1313	1313	0.000112958
1314	1314	0.000113622
1315	1315	0.000113933
1316	1316	0.000113946
1317	1317	0.000113815
1318	1318	0.000113614
1319	1319	0.000113196
1320	1320	0.000112519
1321	1321	0.000111408
1322	1322	0.000109755
1323	1323	0.00010798
1324	1324	0.000106363
1325	1325	0.000104982
1326	1326	0.000103717
1327	1327	0.000102503
1328	1328	0.000101426
1329	1329	0.000100454
1330	1330	9.95584e-05
1331	1331	9.8568e-05
1332	1332	9.79056e-05
1333	1333	9.72812e-05
1334	1334	9.6147e-05
1335	1335	9.48168e-05
1336	1336	9.35177e-05
1337	1337	9.3023e-05
1338	1338	9.40944e-05
1339	1339	9.64492e-05
1340	1340	9.97342e-05
1341	1341	0.000102121
1342	1342	0.000103491
1343	1343	0.00010416
1344	1344	0.000104367
1345	1345	0.000104391
1346	1346	0.000104392
1347	1347	0.00010446
1348	1348	0.00010453
1349	1349	0.000104559
1350	1350	0.000104541
1351	1351	0.000104497
1352	1352	0.000104479
1353	1353	0.000104473
1354	1354	0.000104624
1355	1355	0.000104959
1356	1356	0.000105347
1357	1357	0.000105734
1358	1358	0.000106078
1359	1359	0.000106313
1360	1360	0.000106502
1361	1361	0.000106675
1362	1362	0.000106812
1363	1363	0.000106977
1364	1364	0.000107125
1365	1365	0.000107174
1366	1366	0.000107185
1367	1367	0.00010714
1368	1368	0.000106836
1369	1369	0.000106988
1370	1370	0.000106885
1371	1371	0.000105714
1372	1372	0.000105258
1373	1373	0.000104741
1374	1374	0.000104272
1375	1375	0.000103818
1376	1376	0.00010354
1377	1377	0.000103572
1378	1378	0.000103771
1379	1379	0.000103886
1380	1380	0.000103972
1381	1381	0.000104095
1382	1382	0.000104185
1383	1383	0.000104261
1384	1384	0.000104274
1385	1385	0.000104248
1386	1386	0.000104183
1387	1387	0.000104139
1388	1388	0.000103937
1389	1389	0.000103449
1390	1390	0.000103069
1391	1391	0.000103056
1392	1392	0.000103175
1393	1393	0.000103443
1394	1394	0.000103707
1395	1395	0.00010399
1396	1396	0.000104321
1397	1397	0.000104718
1398	1398	0.000105136
1399	1399	0.000105459
1400	1400	0.000105702
1401	1401	0.000105898
1402	1402	0.000106086
1403	1403	0.000106281
1404	1404	0.000106503
1405	1405	0.000106717
1406	1406	0.000106905
1407	1407	0.000107077
1408	1408	0.000107249
1409	1409	0.000107412
1410	1410	0.000107587
1411	1411	0.000107746
1412	1412	0.000107893
1413	1413	0.000108035
1414	1414	0.000108177
1415	1415	0.000108327
1416	1416	0.00010847
1417	1417	0.000108598
1418	1418	0.000108704
1419	1419	0.000108781
1420	1420	0.000108805
1421	1421	0.000108809
1422	1422	0.000108792
1423	1423	0.000108748
1424	1424	0.000108672
1425	1425	0.000108523
1426	1426	0.00010827
1427	1427	0.000107935
1428	1428	0.000107553
1429	1429	0.000107161
1430	1430	0.000106818
1431	1431	0.000106518
1432	1432	0.000106278
1433	1433	0.00010611
1434	1434	0.000106002
1435	1435	0.000105934
1436	1436	0.000105915
1437	1437	0.000105932
1438	1438	0.000106032
1439	1439	0.000106203
1440	1440	0.000106385
1441	1441	0.000106551
1442	1442	0.000106711
1443	1443	0.000106877
1444	1444	0.000107038
1445	1445	0.000107179
1446	1446	0.00010728
1447	1447	0.000107336
1448	1448	0.000107303
1449	1449	0.000107114
1450	1450	0.000106796
1451	1451	0.000106361
1452	1452	0.000105813
1453	1453	0.000105115
1454	1454	0.000104344
1455	1455	0.000103473
1456	1456	0.000102535
1457	1457	0.000101618
1458	1458	0.000100698
1459	1459	9.97378e-05
1460	1460	9.87404e-05
1461	1461	9.77799e-05
1462	1462	9.69506e-05
1463	1463	9.62322e-05
1464	1464	9.56969e-05
1465	1465	9.54592e-05
1466	1466	9.55329e-05
1467	1467	9.56492e-05
1468	1468	9.55455e-05
1469	1469	9.45389e-05
1470	1470	9.3031e-05
1471	1471	9.27429e-05
1472	1472	9.28727e-05
1473	1473	9.25863e-05
1474	1474	9.25077e-05
1475	1475	9.26181e-05
1476	1476	9.2778e-05
1477	1477	9.31056e-05
1478	1478	9.36564e-05
1479	1479	9.44433e-05
1480	1480	9.50763e-05
1481	1481	9.51934e-05
1482	1482	9.52947e-05
1483	1483	9.52423e-05
1484	1484	9.49967e-05
1485	1485	9.47428e-05
1486	1486	9.45721e-05
1487	1487	9.43581e-05
1488	1488	9.39605e-05
1489	1489	9.34034e-05
1490	1490	9.25647e-05
1491	1491	9.17478e-05
1492	1492	9.12536e-05
1493	1493	9.12263e-05
1494	1494	9.16143e-05
1495	1495	9.23053e-05
1496	1496	9.34064e-05
1497	1497	9.52203e-05
1498	1498	9.77097e-05
1499	1499	9.875e-05
1500	1500	9.88561e-05
1501	1501	9.92275e-05
1502	1502	9.90157e-05
1503	1503	9.81478e-05
1504	1504	9.56171e-05
1505	1505	9.26561e-05
1506	1506	9.09493e-05
1507	1507	9.0167e-05
1508	1508	9.00662e-05
1509	1509	9.04745e-05
1510	1510	9.15353e-05
1511	1511	9.33239e-05
1512	1512	9.54103e-05
1513	1513	9.63165e-05
1514	1514	9.69792e-05
1515	1515	9.77544e-05
1516	1516	9.85748e-05
1517	1517	9.94664e-05
1518	1518	0.000100302
1519	1519	0.000101
1520	1520	0.000101444
1521	1521	0.000101353
1522	1522	0.000100398
1523	1523	9.85732e-05
1524	1524	9.7098e-05
1525	1525	9.66179e-05
1526	1526	9.67826e-05
1527	1527	9.72214e-05
1528	1528	9.80497e-05
1529	1529	9.97696e-05
1530	1530	0.000101586
1531	1531	0.000102769
1532	1532	0.000103319
1533	1533	0.000103554
1534	1534	0.000103549
1535	1535	0.000103511
1536	1536	0.000103593
1537	1537	0.000104203
1538	1538	0.000105193
1539	1539	0.000106031
1540	1540	0.000106624
1541	1541	0.000106979
1542	1542	0.000107051
1543	1543	0.000106953
1544	1544	0.000106764
1545	1545	0.000106416
1546	1546	0.000105908
1547	1547	0.000105401
1548	1548	0.000105011
1549	1549	0.000104766
1550	1550	0.00010469
1551	1551	0.000104744
1552	1552	0.000104884
1553	1553	0.000105047
1554	1554	0.000105124
1555	1555	0.000105071
1556	1556	0.000104907
1557	1557	0.000104703
1558	1558	0.000104623
1559	1559	0.000104652
1560	1560	0.00010461
1561	1561	0.000104537
1562	1562	0.000104471
1563	1563	0.00010438
1564	1564	0.000104239
1565	1565	0.0001041
1566	1566	0.000103998
1567	1567	0.000103951
1568	1568	0.00010396
1569	1569	0.000103944
1570	1570	0.00010379
1571	1571	0.000103444
1572	1572	0.000102993
1573	1573	0.000102531
1574	1574	0.000102181
1575	1575	0.000102078
1576	1576	0.000102231
1577	1577	0.00010245
1578	1578	0.00010265
1579	1579	0.000102837
1580	1580	0.000103067
1581	1581	0.000103338
1582	1582	0.000103547
1583	1583	0.000103568
1584	1584	0.000103374
1585	1585	0.000103196
1586	1586	0.000103217
1587	1587	0.000103246
1588	1588	0.000103252
1589	1589	0.000103405
1590	1590	0.000104175
1591	1591	0.000104786
1592	1592	0.000104822
1593	1593	0.000104466
1594	1594	0.000103905
1595	1595	0.00010322
1596	1596	0.000102629
1597	1597	0.000102331
1598	1598	0.000102219
1599	1599	0.000102183
1600	1600	0.00010206
1601	1601	0.000101816
1602	1602	0.000101672
1603	1603	0.000101913
1604	1604	0.000102265
1605	1605	0.000102728
1606	1606	0.000103234
1607	1607	0.000103613
1608	1608	0.000103808
1609	1609	0.000103872
1610	1610	0.000103917
1611	1611	0.000104061
1612	1612	0.000104346
1613	1613	0.000104651
1614	1614	0.000104839
1615	1615	0.00010505
1616	1616	0.000105164
1617	1617	0.000105057
1618	1618	0.00010466
1619	1619	0.000104297
1620	1620	0.000104033
1621	1621	0.000103842
1622	1622	0.00010366
1623	1623	0.000103502
1624	1624	0.000103376
1625	1625	0.000103249
1626	1626	0.000103119
1627	1627	0.000102976
1628	1628	0.00010285
1629	1629	0.000102788
1630	1630	0.000102782
1631	1631	0.000102868
1632	1632	0.000102971
1633	1633	0.00010331
1634	1634	0.000104113
1635	1635	0.000104874
1636	1636	0.000105315
1637	1637	0.000105512
1638	1638	0.000105592
1639	1639	0.000105624
1640	1640	0.0001057
1641	1641	0.000105737
1642	1642	0.0001056
1643	1643	0.000105133
1644	1644	0.000104754
1645	1645	0.000104597
1646	1646	0.000104566
1647	1647	0.000104624
1648	1648	0.000104745
1649	1649	0.000104916
1650	1650	0.000105075
1651	1651	0.000105129
1652	1652	0.000104746
1653	1653	0.000104083
1654	1654	0.000104227
1655	1655	0.000105217
1656	1656	0.000105055
1657	1657	0.00010414
1658	1658	0.000105003
1659	1659	0.000105128
1660	1660	0.000105096
1661	1661	0.000105056
1662	1662	0.000105041
1663	1663	0.000105035
1664	1664	0.00010507
1665	1665	0.000104618
1666	1666	0.000103404
1667	1667	0.000102474
1668	1668	0.000102912
1669	1669	0.000104114
1670	1670	0.000104949
1671	1671	0.000105166
1672	1672	0.000105037
1673	1673	0.000104857
1674	1674	0.000104589
1675	1675	0.000104175
1676	1676	0.000103732
1677	1677	0.000103614
1678	1678	0.000104035
1679	1679	0.00010464
1680	1680	0.000104972
1681	1681	0.000104979
1682	1682	0.000104413
1683	1683	0.000102749
1684	1684	0.00010147
1685	1685	0.000102372
1686	1686	0.000103958
1687	1687	0.000104711
1688	1688	0.000105002
1689	1689	0.000105005
1690	1690	0.000104887
1691	1691	0.00010465
1692	1692	0.00010422
1693	1693	0.000103751
1694	1694	0.000103419
1695	1695	0.000103178
1696	1696	0.000103134
1697	1697	0.000103533
1698	1698	0.000104159
1699	1699	0.000104773
1700	1700	0.00010528
1701	1701	0.000105551
1702	1702	0.000105672
1703	1703	0.000105701
1704	1704	0.000105668
1705	1705	0.000105745
1706	1706	0.000105548
1707	1707	0.000105138
1708	1708	0.00010478
1709	1709	0.000105001
1710	1710	0.000104864
1711	1711	0.000104741
1712	1712	0.00010464
1713	1713	0.000104796
1714	1714	0.00010524
1715	1715	0.000105775
1716	1716	0.000105982
1717	1717	0.00010572
1718	1718	0.000105565
1719	1719	0.000105784
1720	1720	0.000103955
1721	1721	9.99665e-05
1722	1722	9.83376e-05
1723	1723	9.95773e-05
1724	1724	0.000102065
1725	1725	0.000103728
1726	1726	0.000104859
1727	1727	0.000105538
1728	1728	0.000105602
1729	1729	0.000105538
1730	1730	0.000105445
1731	1731	0.000105443
1732	1732	0.000105531
1733	1733	0.000105663
1734	1734	0.00010573
1735	1735	0.000105695
1736	1736	0.000105205
1737	1737	0.000100529
1738	1738	9.67161e-05
1739	1739	9.86415e-05
1740	1740	0.000102191
1741	1741	0.00010384
1742	1742	0.000104571
1743	1743	0.000104986
1744	1744	0.000105289
1745	1745	0.000105364
1746	1746	0.000105274
1747	1747	0.000105169
1748	1748	0.000105144
1749	1749	0.00010518
1750	1750	0.000105213
1751	1751	0.000105237
1752	1752	0.000105216
1753	1753	0.000105096
1754	1754	0.000104943
1755	1755	0.000104975
1756	1756	0.000105106
1757	1757	0.000105108
1758	1758	0.000105145
1759	1759	0.000105331
1760	1760	0.000105588
1761	1761	0.000105814
1762	1762	0.000105847
1763	1763	0.000105634
1764	1764	0.000105425
1765	1765	0.000105528
1766	1766	0.000105848
1767	1767	0.000106161
1768	1768	0.00010635
1769	1769	0.000106446
1770	1770	0.00010649
1771	1771	0.000106522
1772	1772	0.000106557
1773	1773	0.000106603
1774	1774	0.000106667
1775	1775	0.000106667
1776	1776	0.000106661
1777	1777	0.000106358
1778	1778	0.000101398
1779	1779	9.08536e-05
1780	1780	8.40356e-05
1781	1781	8.50711e-05
1782	1782	9.29132e-05
1783	1783	0.000100499
1784	1784	0.000104084
1785	1785	0.000105349
1786	1786	0.000105865
1787	1787	0.000106017
1788	1788	0.000106029
1789	1789	0.000106037
1790	1790	0.000106046
1791	1791	0.00010605
1792	1792	0.000106037
1793	1793	0.000106033
1794	1794	0.000105559
1795	1795	0.000101398
1796	1796	9.63105e-05
1797	1797	9.68424e-05
1798	1798	0.000102003
1799	1799	0.000105251
1800	1800	0.000105876
1801	1801	0.00010582
1802	1802	0.000105702
1803	1803	0.000105455
1804	1804	0.00010526
1805	1805	0.000105156
1806	1806	0.000105171
1807	1807	0.00010521
1808	1808	0.000105253
1809	1809	0.000105287
1810	1810	0.000105307
1811	1811	0.000105317
1812	1812	0.000105317
1813	1813	0.000105276
1814	1814	0.000105271
1815	1815	0.000105277
1816	1816	0.000105283
1817	1817	0.000105332
1818	1818	0.000105422
1819	1819	0.000105549
1820	1820	0.000105664
1821	1821	0.000105747
1822	1822	0.000105806
1823	1823	0.000105834
1824	1824	0.000105856
1825	1825	0.000105883
1826	1826	0.000105916
1827	1827	0.000105978
1828	1828	0.000106042
1829	1829	0.000106075
1830	1830	0.000106096
1831	1831	0.000106142
1832	1832	0.000106165
1833	1833	0.000106219
1834	1834	0.000106261
1835	1835	0.000106219
1836	1836	0.000105975
1837	1837	0.000105781
1838	1838	0.000105801
1839	1839	0.000105971
1840	1840	0.000105964
1841	1841	0.000105307
1842	1842	0.000104345
1843	1843	0.00010445
1844	1844	0.000105203
1845	1845	0.00010563
1846	1846	0.000105548
1847	1847	0.000105847
1848	1848	0.000105959
1849	1849	0.000105545
1850	1850	0.000105341
1851	1851	0.000105791
1852	1852	0.000105859
1853	1853	9.69751e-05
1854	1854	8.37696e-05
1855	1855	7.67271e-05
1856	1856	7.98443e-05
1857	1857	9.09453e-05
1858	1858	9.96109e-05
1859	1859	0.000102669
1860	1860	0.000103487
1861	1861	0.000103879
1862	1862	0.000104348
1863	1863	0.000104589
1864	1864	0.000104881
1865	1865	0.000104811
1866	1866	0.000104416
1867	1867	0.000101662
1868	1868	8.21302e-05
1869	1869	6.60182e-05
1870	1870	6.15607e-05
1871	1871	6.63631e-05
1872	1872	7.92165e-05
1873	1873	9.34146e-05
1874	1874	9.95506e-05
1875	1875	0.000100265
1876	1876	0.000100641
1877	1877	0.000101183
1878	1878	0.000101477
1879	1879	0.000101867
1880	1880	0.000103262
1881	1881	0.000104078
1882	1882	0.00010243
1883	1883	9.04774e-05
1884	1884	6.59346e-05
1885	1885	5.49553e-05
1886	1886	5.56862e-05
1887	1887	6.9721e-05
1888	1888	8.93106e-05
1889	1889	9.91031e-05
1890	1890	0.000100836
1891	1891	0.000100211
1892	1892	0.000100084
1893	1893	0.000100848
1894	1894	0.000101791
1895	1895	0.000101332
1896	1896	9.93629e-05
1897	1897	8.023e-05
1898	1898	6.299e-05
1899	1899	5.74942e-05
1900	1900	5.9714e-05
1901	1901	6.89272e-05
1902	1902	8.26765e-05
1903	1903	9.26661e-05
1904	1904	9.52076e-05
1905	1905	9.59091e-05
1906	1906	9.75921e-05
1907	1907	9.96462e-05
1908	1908	0.000100886
1909	1909	0.000100914
1910	1910	9.92457e-05
1911	1911	9.58397e-05
1912	1912	8.74098e-05
1913	1913	7.88161e-05
1914	1914	7.48735e-05
1915	1915	7.55516e-05
1916	1916	7.94139e-05
1917	1917	8.45511e-05
1918	1918	8.95197e-05
1919	1919	9.32918e-05
1920	1920	9.54408e-05
1921	1921	9.64156e-05
1922	1922	9.68594e-05
1923	1923	9.71399e-05
1924	1924	9.74518e-05
1925	1925	9.77901e-05
1926	1926	9.78706e-05
1927	1927	9.73875e-05
1928	1928	9.64596e-05
1929	1929	9.5373e-05
1930	1930	9.52327e-05
1931	1931	9.60695e-05
1932	1932	9.76886e-05
1933	1933	9.94829e-05
1934	1934	0.000100717
1935	1935	0.000101259
1936	1936	0.000101276
1937	1937	0.000101275
1938	1938	0.00010139
1939	1939	0.000102189
1940	1940	0.000102989
1941	1941	0.000102416
1942	1942	0.000101151
1943	1943	9.84885e-05
1944	1944	9.33156e-05
1945	1945	9.03749e-05
1946	1946	9.20382e-05
1947	1947	9.5119e-05
1948	1948	9.97464e-05
1949	1949	0.000102705
1950	1950	0.000103339
1951	1951	0.000103452
1952	1952	0.000103485
1953	1953	0.000103457
1954	1954	0.000102398
1955	1955	9.8518e-05
1956	1956	9.18218e-05
1957	1957	8.69912e-05
1958	1958	8.67004e-05
1959	1959	9.01026e-05
1960	1960	9.51611e-05
1961	1961	9.93274e-05
1962	1962	0.000101424
1963	1963	0.000101709
1964	1964	0.000100175
1965	1965	9.51457e-05
1966	1966	8.57868e-05
1967	1967	7.67899e-05
1968	1968	7.08068e-05
1969	1969	6.89058e-05
1970	1970	7.17082e-05
1971	1971	7.94589e-05
1972	1972	8.59936e-05
1973	1973	8.55553e-05
1974	1974	7.99106e-05
1975	1975	7.48429e-05
1976	1976	7.53369e-05
1977	1977	8.12087e-05
1978	1978	8.66557e-05
1979	1979	8.86135e-05
1980	1980	8.62035e-05
1981	1981	7.58526e-05
1982	1982	6.73257e-05
1983	1983	7.32688e-05
1984	1984	8.6655e-05
1985	1985	9.49259e-05
1986	1986	9.76111e-05
1987	1987	9.62998e-05
1988	1988	9.31629e-05
1989	1989	8.79634e-05
1990	1990	8.0742e-05
1991	1991	7.97289e-05
1992	1992	8.06532e-05
1993	1993	8.14682e-05
1994	1994	8.47226e-05
1995	1995	9.33952e-05
1996	1996	9.91607e-05
1997	1997	9.91992e-05
1998	1998	9.79207e-05
[truncated: 15,521 more rows]

## Sheet: 329m Spring
Hours after model run started	Hours after injection	Tracer Concentration
0		0
1		0
2		0
3		0
4		0
5		0
6		0
7		0
8		0
9		0
10		0
11		0
12		0
13		0
14		0
15		0
16		0
17		0
18		0
19		0
20		0
21		0
22		0
23		0
24		0
25		0
26		0
27		0
28		0
29		0
30		0
31		0
32		0
33		0
34		0
35		0
36		0
37		0
38		0
39		0
40		0
41		0
42		0
43		0
44		0
45		0
46		0
47		0
48		0
49		0
50		0
51		0
52		0
53		0
54		0
55		0
56		0
57		0
58		0
59		0
60		0
61		0
62		0
63		0
64		0
65		0
66		0
67		0
68		0
69		0
70		0
71		0
72		0
73		0
74		0
75		0
76		0
77		0
78		0
79		0
80		0
81		0
82		0
83		0
84		0
85		0
86		0
87		0
88		0
89		0
90		0
91		0
92		0
93		0
94		0
95		0
96		0
97		0
98		0
99		0
100		0
101		0
102		0
103		0
104		0
105		0
106		0
107		0
108		0
109		0
110		0
111		0
112		0
113		0
114		0
115		0
116		0
117		0
118		0
119		0
120		0
121		0
122		0
123		0
124		0
125		0
126		0
127		0
128		0
129		0
130		0
131		0
132		0
133		0
134		0
135		0
136		0
137		0
138		0
139		0
140		0
141		0
142		0
143		0
144		0
145		0
146		0
147		0
148		0
149		0
150		0
151		0
152		0
153		0
154		0
155		0
156		0
157		0
158		0
159		0
160		0
161		0
162		0
163		0
164		0
165		0
166		0
167		0
168		0
169		0
170		0
171		0
172		0
173		0
174		0
175		0
176		0
177		0
178		0
179		0
180		0
181		0
182		0
183		0
184		0
185		0
186		0
187		0
188		0
189		0
190		0
191		0
192		0
193		0
194		0
195		0
196		0
197		0
198		0
199		0
200		0
201		0
202		0
203		0
204		0
205		0
206		0
207		0
208		0
209		0
210		0
211		0
212		0
213		0
214		0
215		0
216		0
217		0
218		0
219		0
220		0
221		0
222		0
223		0
224		0
225		0
226		0
227		0
228		0
229		0
230		0
231		0
232		0
233		0
234		0
235		0
236		0
237		0
238		0
239		0
240		0
241		0
242		0
243		0
244		0
245		0
246		0
247		0
248		0
249		0
250		0
251		0
252		0
253		0
254		0
255		0
256		0
257		0
258		0
259		0
260		0
261		0
262		0
263		0
264		0
265		0
266		0
267		0
268		0
269		0
270		0
271		0
272		0
273		0
274		0
275		0
276		0
277		0
278		0
279		0
280		0
281		0
282		0
283		0
284		0
285		0
286		0
287		0
288		0
289		0
290		0
291		0
292		0
293		0
294		0
295		0
296		0
297		0
298		0
299		0
300		0
301		0
302		0
303		0
304		0
305		0
306		0
307		0
308		0
309		0
310		0
311		0
312		0
313		0
314		0
315		0
316		0
317		0
318		0
319		0
320		0
321		0
322		0
323		0
324		0
325		0
326		0
327		0
328		0
329		0
330		0
331		0
332		0
333		0
334		0
335		0
336		0
337		0
338		0
339		0
340		0
341		0
342		0
343		0
344		0
345		0
346		0
347		0
348		0
349		0
350		0
351		0
352		0
353		0
354		0
355		0
356		0
357		0
358		0
359		0
360		0
361		0
362		0
363		0
364		0
365		0
366		0
367		0
368		0
369		0
370		0
371		0
372		0
373		0
374		0
375		0
376		0
377		0
378		0
379		0
380		0
381		0
382		0
383		0
384		0
385		0
386		0
387		0
388		0
389		0
390		0
391		0
392		0
393		0
394		0
395		0
396		0
397		0
398		0
399		0
400		0
401		0
402		0
403		0
404		0
405		0
406		0
407		0
408		0
409		0
410		0
411		0
412		0
413		0
414		0
415		0
416		0
417		0
418		0
419		0
420		0
421		0
422		0
423		0
424		0
425		0
426		0
427		0
428		0
429		0
430		0
431		0
432		0
433		0
434		0
435		0
436		0
437		0
438		0
439		0
440		0
441		0
442		0
443		0
444		0
445		0
446		0
447		0
448		0
449		0
450		0
451		0
452		0
453		0
454		0
455		0
456		0
457		0
458		0
459		0
460		0
461		0
462		0
463		0
464		0
465		0
466		0
467		0
468		0
469		0
470		0
471		0
472		0
473		0
474		0
475		0
476		0
477		0
478		0
479		0
480		0
481		0
482		0
483		0
484		0
485		0
486		0
487		0
488		0
489		0
490		0
491		0
492		0
493		0
494		0
495		0
496		0
497		0
498		0
499		0
500		0
501		0
502		0
503		0
504		0
505		0
506		0
507		0
508		0
509		0
510		0
511		0
512		0
513		0
514		0
515		0
516		0
517		0
518		0
519		0
520		0
521		0
522		0
523		0
524		0
525		0
526		0
527		0
528		0
529		0
530		0
531		0
532		0
533		0
534		0
535		0
536		0
537		0
538		0
539		0
540		0
541		0
542		0
543		0
544		0
545		0
546		0
547		0
548		0
549		0
550		0
551		0
552		0
553		0
554		0
555		0
556		0
557		0
558		0
559		0
560		0
561		0
562		0
563		0
564		0
565		0
566		0
567		0
568		0
569		0
570		0
571		0
572		0
573		0
574		0
575		0
576		0
577		0
578		0
579		0
580		0
581		0
582		0
583		0
584		0
585		0
586		0
587		0
588		0
589		0
590		0
591		0
592		0
593		0
594		0
595		0
596		0
597		0
598		0
599		0
600		0
601		0
602		0
603		0
604		0
605		0
606		0
607		0
608		0
609		0
610		0
611		0
612		0
613		0
614		0
615		0
616		0
617		0
618		0
619		0
620		0
621		0
622		0
623		0
624		0
625		0
626		0
627		0
628		0
629		0
630		0
631		0
632		0
633		0
634		0
635		0
636		0
637		0
638		0
639		0
640		0
641		0
642		0
643		0
644		0
645		0
646		0
647		0
648		0
649		0
650		0
651		0
652		0
653		0
654		0
655		0
656		0
657		0
658		0
659		0
660		0
661		0
662		0
663		0
664		0
665		0
666		0
667		0
668		0
669		0
670		0
671		0
672		0
673		0
674		0
675		0
676		0
677		0
678		0
679		0
680		0
681		0
682		0
683		0
684		0
685		0
686		0
687		0
688		0
689		0
690		0
691		0
692		0
693		0
694		0
695		0
696		0
697		0
698		0
699		0
700		0
701		0
702		0
703		0
704		0
705		0
706		0
707		0
708		0
709		0
710		0
711		0
712		0
713		0
714		0
715		0
716		0
717		0
718		0
719		0
720		0
721		0
722		0
723		0
724		0
725		0
726		0
727		0
728		0
729		0
730		0
731		0
732		0
733		0
734		0
735		0
736		0
737		0
738		0
739		0
740		0
741		0
742		0
743		0
744		0
745		0
746		0
747		0
748		0
749		0
750		0
751		0
752		0
753		0
754		0
755		0
756		0
757		0
758		0
759		0
760		0
761		0
762		0
763		0
764		0
765		0
766		0
767		0
768		0
769		0
770		0
771		0
772		0
773		0
774		0
775		0
776		0
777		0
778		0
779		0
780		0
781		0
782		0
783		0
784		0
785		0
786		0
787		0
788		0
789		0
790		0
791		0
792		0
793		0
794		0
795		0
796		0
797		0
798		0
799		0
800		0
801		0
802		0
803		0
804		0
805		0
806		0
807		0
808		0
809		0
810		0
811		0
812		0
813		0
814		0
815		0
816		0
817		0
818		0
819		0
820		0
821		0
822		0
823		0
824		0
825		0
826		0
827		0
828		0
829		0
830		0
831		0
832		0
833		0
834		0
835		0
836		0
837		0
838		0
839		0
840		0
841		0
842		0
843		0
844		0
845		0
846		0
847		0
848		0
849		0
850		0
851		0
852		0
853		0
854		0
855		0
856		0
857		0
858		0
859		0
860		0
861		0
862		0
863		0
864		0
865		0
866		0
867		0
868		0
869		0
870		0
871		0
872		0
873		0
874		0
875		0
876		0
877		0
878		0
879		0
880		0
881		0
882		0
883		0
884		0
885		0
886		0
887		0
888		0
889		0
890		0
891		0
892		0
893		0
894		0
895		0
896		0
897		0
898		0
899		0
900		0
901		0
902		0
903		0
904		0
905		0
906		0
907		0
908		0
909		0
910		0
911		0
912		0
913		0
914		0
915		0
916		0
917		0
918		0
919		0
920		0
921		0
922		0
923		0
924		0
925		0
926		0
927		0
928		0
929		0
930		0
931		0
932		0
933		0
934		0
935		0
936		0
937		0
938		0
939		0
940		0
941		0
942		0
943		0
944		0
945		0
946		0
947		0
948		0
949		0
950		0
951		0
952		0
953		0
954		0
955		0
956		0
957		0
958		0
959		0
960		0
961		0
962		0
963		0
964		0
965		0
966		0
967		0
968		0
969		0
970		0
971		0
972		0
973		0
974		0
975		0
976		0
977		0
978		0
979		0
980		0
981		0
982		0
983		0
984		0
985		0
986		0
987		0
988		0
989		0
990		0
991		0
992		0
993		0
994		0
995		0
996		0
997		0
998		0
999		0
1000		0
1001		0
1002		0
1003		0
1004		0
1005		0
1006		0
1007		0
1008		0
1009		0
1010		0
1011		0
1012		0
1013		0
1014		0
1015		0
1016		0
1017		0
1018		0
1019		0
1020		0
1021		0
1022		0
1023		0
1024		0
1025		0
1026		0
1027		0
1028		0
1029		0
1030		0
1031		0
1032		0
1033		0
1034		0
1035		0
1036		0
1037		0
1038		0
1039		0
1040		0
1041		0
1042		0
1043		0
1044		0
1045		0
1046		0
1047		0
1048		0
1049		0
1050		0
1051		0
1052		0
1053		0
1054		0
1055		0
1056		0
1057		0
1058		0
1059		0
1060		0
1061		0
1062		0
1063		0
1064		0
1065		0
1066		0
1067		0
1068		0
1069		0
1070		0
1071		0
1072		0
1073		0
1074		0
1075		0
1076		0
1077		0
1078		0
1079		0
1080		0
1081		0
1082		0
1083		0
1084		0
1085		0
1086		0
1087		0
1088		0
1089		0
1090		0
1091		0
1092		0
1093		0
1094		0
1095		0
1096		0
1097		0
1098		0
1099		0
1100		0
1101		0
1102		0
1103		0
1104		0
1105		0
1106		0
1107		0
1108		0
1109		0
1110		0
1111		0
1112		0
1113		0
1114		0
1115		0
1116		0
1117		0
1118		0
1119		0
1120		0
1121		0
1122		0
1123		0
1124		0
1125		0
1126		0
1127		0
1128		0
1129		0
1130		0
1131		0
1132		0
1133		0
1134		0
1135		0
1136		0
1137		0
1138		0
1139		0
1140		0
1141		0
1142		0
1143		0
1144		0
1145		0
1146		0
1147		0
1148		0
1149		0
1150		0
1151		0
1152		0
1153		0
1154		0
1155		0
1156		0
1157		0
1158		0
1159		0
1160		0
1161		0
1162		0
1163		0
1164		0
1165		0
1166		0
1167		0
1168		0
1169		0
1170		0
1171		0
1172		0
1173		0
1174		0
1175		0
1176		0
1177		0
1178		0
1179		0
1180		0
1181		0
1182		0
1183		0
1184		0
1185		0
1186		0
1187		0
1188		0
1189		0
1190		0
1191		0
1192		0
1193		0
1194		0
1195		0
1196		0
1197		0
1198		0
1199		0
1200		0
1201		0
1202		0
1203		0
1204		0
1205		0
1206		0
1207		0
1208		0
1209		0
1210		0
1211		0
1212		0
1213		0
1214		0
1215		0
1216		0
1217		0
1218		0
1219		0
1220		0
1221		0
1222		0
1223		0
1224		0
1225		0
1226		0
1227		0
1228		0
1229		0
1230		0
1231		0
1232		0
1233		0
1234		0
1235		0
1236		0
1237		0
1238		0
1239		0
1240		0
1241		0
1242		0
1243		0
1244		0
1245		0
1246		0
1247		0
1248		0
1249		0
1250		0
1251		0
1252		0
1253		0
1254		0
1255		0
1256		0
1257		0
1258		0
1259		0
1260		0
1261		0
1262		0
1263		0
1264		0
1265		0
1266		0
1267		0
1268		0
1269		0
1270		0
1271		0
1272		0
1273		0
1274		0
1275		0
1276		0
1277		0
1278		0
1279		0
1280		0
1281		0
1282		0
1283		0
1284		0
1285		0
1286		0
1287		0
1288		0
1289		0
1290		0
1291		0
1292		0
1293		0
1294		0
1295		0
1296		0
1297		0
1298		0
1299		0
1300		0
1301		0
1302		0
1303		0
1304		0
1305		0
1306		0
1307		0
1308		0
1309		0
1310		0
1311		0
1312		0
1313		0
1314		0
1315		0
1316		0
1317		0
1318		0
1319		0
1320		0
1321		0
1322		0
1323		0
1324		0
1325		0
1326		0
1327		0
1328		0
1329		0
1330		0
1331		0
1332		0
1333		0
1334		0
1335		0
1336		0
1337		0
1338		0
1339		0
1340		0
1341		0
1342		0
1343		0
1344		0
1345		0
1346		0
1347		0
1348		0
1349		0
1350		0
1351		0
1352		0
1353		0
1354		0
1355		0
1356		0
1357		0
1358		0
1359		0
1360		0
1361		0
1362		0
1363		0
1364		0
1365		0
1366		0
1367		0
1368		0
1369		0
1370		0
1371		0
1372		0
1373		0
1374		0
1375		0
1376		0
1377		0
1378		0
1379		0
1380		0
1381		0
1382		0
1383		0
1384		0
1385		0
1386		0
1387		0
1388		0
1389		0
1390		0
1391		0
1392		0
1393		0
1394		0
1395		0
1396		0
1397		0
1398		0
1399		0
1400		0
1401		0
1402		0
1403		0
1404		0
1405		0
1406		0
1407		0
1408		0
1409		0
1410		0
1411		0
1412		0
1413		0
1414		0
1415		0
1416		0
1417		0
1418		0
1419		0
1420		0
1421		0
1422		0
1423		0
1424		0
1425		0
1426		0
1427		0
1428		0
1429		0
1430		0
1431		0
1432		0
1433		0
1434		0
1435		0
1436		0
1437		0
1438		0
1439		0
1440		0
1441		0
1442		0
1443		0
1444		0
1445		0
1446		0
1447		0
1448		0
1449		0
1450		0
1451		0
1452		0
1453		0
1454		0
1455		0
1456		0
1457		0
1458		0
1459		0
1460		0
1461		0
1462		0
1463		0
1464		0
1465		0
1466		0
1467		0
1468		0
1469		0
1470		0
1471		0
1472		0
1473		0
1474		0
1475		0
1476		0
1477		0
1478		0
1479		0
1480		0
1481		0
1482		0
1483		0
1484		0
1485		0
1486		0
1487		0
1488		0
1489		0
1490		0
1491		0
1492		0
1493		0
1494		0
1495		0
1496		0
1497		0
1498		0
1499		0
1500		0
1501		0
1502		0
1503		0
1504		0
1505		0
1506		0
1507		0
1508		0
1509		0
1510		0
1511		0
1512		0
1513		0
1514		0
1515		0
1516		0
1517		0
1518		0
1519		0
1520		0
1521		0
1522		0
1523		0
1524		0
1525		0
1526		0
1527		0
1528		0
1529		0
1530		0
1531		0
1532		0
1533		0
1534		0
1535		0
1536		0
1537		0
1538		0
1539		0
1540		0
1541		0
1542		0
1543		0
1544		0
1545		0
1546		0
1547		0
1548		0
1549		0
1550		0
1551		0
1552		0
1553		0
1554		0
1555		0
1556		0
1557		0
1558		0
1559		0
1560		0
1561		0
1562		0
1563		0
1564		0
1565		0
1566		0
1567		0
1568		0
1569		0
1570		0
1571		0
1572		0
1573		0
1574		0
1575		0
1576		0
1577		0
1578		0
1579		0
1580		0
1581		0
1582		0
1583		0
1584		0
1585		0
1586		0
1587		0
1588		0
1589		0
1590		0
1591		0
1592		0
1593		0
1594		0
1595		0
1596		0
1597		0
1598		0
1599		0
1600		0
1601		0
1602		0
1603		0
1604		0
1605		0
1606		0
1607		0
1608		0
1609		0
1610		0
1611		0
1612		0
1613		0
1614		0
1615		0
1616		0
1617		0
1618		0
1619		0
1620		0
1621		0
1622		0
1623		0
1624		0
1625		0
1626		0
1627		0
1628		0
1629		0
1630		0
1631		0
1632		0
1633		0
1634		0
1635		0
1636		0
1637		0
1638		0
1639		0
1640		0
1641		0
1642		0
1643		0
1644		0
1645		0
1646		0
1647		0
1648		0
1649		0
1650		0
1651		0
1652		0
1653		0
1654		0
1655		0
1656		0
1657		0
1658		0
1659		0
1660		0
1661		0
1662		0
1663		0
1664		0
1665		0
1666		0
1667		0
1668		0
1669		0
1670		0
1671		0
1672		0
1673		0
1674		0
1675		0
1676		0
1677		0
1678		0
1679		0
1680		0
1681		0
1682		0
1683		0
1684		0
1685		0
1686		0
1687		0
1688		0
1689		0
1690		0
1691		0
1692		0
1693		0
1694		0
1695		0
1696		0
1697		0
1698		0
1699		0
1700		0
1701		0
1702		0
1703		0
1704		0
1705		0
1706		0
1707		0
1708		0
1709		0
1710		0
1711		0
1712		0
1713		0
1714		0
1715		0
1716		0
1717		0
1718		0
1719		0
1720		0
1721		0
1722		0
1723		0
1724		0
1725		0
1726		0
1727		0
1728		0
1729		0
1730		0
1731		0
1732		0
1733		0
1734		0
1735		0
1736		0
1737		0
1738		0
1739		0
1740		0
1741		0
1742		0
1743		0
1744		0
1745		0
1746		0
1747		0
1748		0
1749		0
1750		0
1751		0
1752		0
1753		0
1754		0
1755		0
1756		0
1757		0
1758		0
1759		0
1760		0
1761		0
1762		0
1763		0
1764		0
1765		0
1766		0
1767		0
1768		0
1769		0
1770		0
1771		0
1772		0
1773		0
1774		0
1775		0
1776		0
1777		0
1778		0
1779		0
1780		0
1781		0
1782		0
1783		0
1784		0
1785		0
1786		0
1787		0
1788		0
1789		0
1790		0
1791		0
1792		0
1793		0
1794		0
1795		0
1796		0
1797		0
1798		0
1799		0
1800		0
1801		0
1802		0
1803		0
1804		0
1805		0
1806		0
1807		0
1808		0
1809		0
1810		0
1811		0
1812		0
1813		0
1814		0
1815		0
1816		0
1817		0
1818		0
1819		0
1820		0
1821		0
1822		0
1823		0
1824		0
1825		0
1826		0
1827		0
1828		0
1829		0
1830		0
1831		0
1832		0
1833		0
1834		0
1835		0
1836		0
1837		0
1838		0
1839		0
1840		0
1841		0
1842		0
1843		0
1844		0
1845		0
1846		0
1847		0
1848		0
1849		0
1850		0
1851		0
1852		0
1853		0
1854		0
1855		0
1856		0
1857		0
1858		0
1859		0
1860		0
1861		0
1862		0
1863		0
1864		0
1865		0
1866		0
1867		0
1868		0
1869		0
1870		0
1871		0
1872		0
1873		0
1874		0
1875		0
1876		0
1877		0
1878		0
1879		0
1880		0
1881		0
1882		0
1883		0
1884		0
1885		0
1886		0
1887		0
1888		0
1889		0
1890		0
1891		0
1892		0
1893		0
1894		0
1895		0
1896		0
1897		0
1898		0
1899		0
1900		0
1901		0
1902		0
1903		0
1904		0
1905		0
1906		0
1907		0
1908		0
1909		0
1910		0
1911		0
1912		0
1913		0
1914		0
1915		0
1916		0
1917		0
1918		0
1919		0
1920		0
1921		0
1922		0
1923		0
1924		0
1925		0
1926		0
1927		0
1928		0
1929		0
1930		0
1931		0
1932		0
1933		0
1934		0
1935		0
1936		0
1937		0
1938		0
1939		0
1940		0
1941		0
1942		0
1943		0
1944		0
1945		0
1946		0
1947		0
1948		0
1949		0
1950		0
1951		0
1952		0
1953		0
1954		0
1955		0
1956		0
1957		0
1958		0
1959		0
1960		0
1961		0
1962		0
1963		0
1964		0
1965		0
1966		0
1967		0
1968		0
1969		0
1970		0
1971		0
1972		0
1973		0
1974		0
1975		0
1976		0
1977		0
1978		0
1979		0
1980		0
1981		0
1982		0
1983		0
1984		0
1985		0
1986		0
1987		0
1988		0
1989		0
1990		0
1991		0
1992		0
1993		0
1994		0
1995		0
1996		0
1997		0
1998		0
[truncated: 15,521 more rows]

## Sheet: 329m Summer
Hours after model run started	Hours after injection	Tracer Concentration
0		0
1		0
2		0
3		0
4		0
5		0
6		0
7		0
8		0
9		0
10		0
11		0
12		0
13		0
14		0
15		0
16		0
17		0
18		0
19		0
20		0
21		0
22		0
23		0
24		0
25		0
26		0
27		0
28		0
29		0
30		0
31		0
32		0
33		0
34		0
35		0
36		0
37		0
38		0
39		0
40		0
41		0
42		0
43		0
44		0
45		0
46		0
47		0
48		0
49		0
50		0
51		0
52		0
53		0
54		0
55		0
56		0
57		0
58		0
59		0
60		0
61		0
62		0
63		0
64		0
65		0
66		0
67		0
68		0
69		0
70		0
71		0
72		0
73		0
74		0
75		0
76		0
77		0
78		0
79		0
80		0
81		0
82		0
83		0
84		0
85		0
86		0
87		0
88		0
89		0
90		0
91		0
92		0
93		0
94		0
95		0
96		0
97		0
98		0
99		0
100		0
101		0
102		0
103		0
104		0
105		0
106		0
107		0
108		0
109		0
110		0
111		0
112		0
113		0
114		0
115		0
116		0
117		0
118		0
119		0
120		0
121		0
122		0
123		0
124		0
125		0
126		0
127		0
128		0
129		0
130		0
131		0
132		0
133		0
134		0
135		0
136		0
137		0
138		0
139		0
140		0
141		0
142		0
143		0
144		0
145		0
146		0
147		0
148		0
149		0
150		0
151		0
152		0
153		0
154		0
155		0
156		0
157		0
158		0
159		0
160		0
161		0
162		0
163		0
164		0
165		0
166		0
167		0
168		0
169		0
170		0
171		0
172		0
173		0
174		0
175		0
176		0
177		0
178		0
179		0
180		0
181		0
182		0
183		0
184		0
185		0
186		0
187		0
188		0
189		0
190		0
191		0
192		0
193		0
194		0
195		0
196		0
197		0
198		0
199		0
200		0
201		0
202		0
203		0
204		0
205		0
206		0
207		0
208		0
209		0
210		0
211		0
212		0
213		0
214		0
215		0
216		0
217		0
218		0
219		0
220		0
221		0
222		0
223		0
224		0
225		0
226		0
227		0
228		0
229		0
230		0
231		0
232		0
233		0
234		0
235		0
236		0
237		0
238		0
239		0
240		0
241		0
242		0
243		0
244		0
245		0
246		0
247		0
248		0
249		0
250		0
251		0
252		0
253		0
254		0
255		0
256		0
257		0
258		0
259		0
260		0
261		0
262		0
263		0
264		0
265		0
266		0
267		0
268		0
269		0
270		0
271		0
272		0
273		0
274		0
275		0
276		0
277		0
278		0
279		0
280		0
281		0
282		0
283		0
284		0
285		0
286		0
287		0
288		0
289		0
290		0
291		0
292		0
293		0
294		0
295		0
296		0
297		0
298		0
299		0
300		0
301		0
302		0
303		0
304		0
305		0
306		0
307		0
308		0
309		0
310		0
311		0
312		0
313		0
314		0
315		0
316		0
317		0
318		0
319		0
320		0
321		0
322		0
323		0
324		0
325		0
326		0
327		0
328		0
329		0
330		0
331		0
332		0
333		0
334		0
335		0
336		0
337		0
338		0
339		0
340		0
341		0
342		0
343		0
344		0
345		0
346		0
347		0
348		0
349		0
350		0
351		0
352		0
353		0
354		0
355		0
356		0
357		0
358		0
359		0
360		0
361		0
362		0
363		0
364		0
365		0
366		0
367		0
368		0
369		0
370		0
371		0
372		0
373		0
374		0
375		0
376		0
377		0
378		0
379		0
380		0
381		0
382		0
383		0
384		0
385		0
386		0
387		0
388		0
389		0
390		0
391		0
392		0
393		0
394		0
395		0
396		0
397		0
398		0
399		0
400		0
401		0
402		0
403		0
404		0
405		0
406		0
407		0
408		0
409		0
410		0
411		0
412		0
413		0
414		0
415		0
416		0
417		0
418		0
419		0
420		0
421		0
422		0
423		0
424		0
425		0
426		0
427		0
428		0
429		0
430		0
431		0
432		0
433		0
434		0
435		0
436		0
437		0
438		0
439		0
440		0
441		0
442		0
443		0
444		0
445		0
446		0
447		0
448		0
449		0
450		0
451		0
452		0
453		0
454		0
455		0
456		0
457		0
458		0
459		0
460		0
461		0
462		0
463		0
464		0
465		0
466		0
467		0
468		0
469		0
470		0
471		0
472		0
473		0
474		0
475		0
476		0
477		0
478		0
479		0
480		0
481		0
482		0
483		0
484		0
485		0
486		0
487		0
488		0
489		0
490		0
491		0
492		0
493		0
494		0
495		0
496		0
497		0
498		0
499		0
500		0
501		0
502		0
503		0
504		0
505		0
506		0
507		0
508		0
509		0
510		0
511		0
512		0
513		0
514		0
515		0
516		0
517		0
518		0
519		0
520		0
521		0
522		0
523		0
524		0
525		0
526		0
527		0
528		0
529		0
530		0
531		0
532		0
533		0
534		0
535		0
536		0
537		0
538		0
539		0
540		0
541		0
542		0
543		0
544		0
545		0
546		0
547		0
548		0
549		0
550		0
551		0
552		0
553		0
554		0
555		0
556		0
557		0
558		0
559		0
560		0
561		0
562		0
563		0
564		0
565		0
566		0
567		0
568		0
569		0
570		0
571		0
572		0
573		0
574		0
575		0
576		0
577		0
578		0
579		0
580		0
581		0
582		0
583		0
584		0
585		0
586		0
587		0
588		0
589		0
590		0
591		0
592		0
593		0
594		0
595		0
596		0
597		0
598		0
599		0
600		0
601		0
602		0
603		0
604		0
605		0
606		0
607		0
608		0
609		0
610		0
611		0
612		0
613		0
614		0
615		0
616		0
617		0
618		0
619		0
620		0
621		0
622		0
623		0
624		0
625		0
626		0
627		0
628		0
629		0
630		0
631		0
632		0
633		0
634		0
635		0
636		0
637		0
638		0
639		0
640		0
641		0
642		0
643		0
644		0
645		0
646		0
647		0
648		0
649		0
650		0
651		0
652		0
653		0
654		0
655		0
656		0
657		0
658		0
659		0
660		0
661		0
662		0
663		0
664		0
665		0
666		0
667		0
668		0
669		0
670		0
671		0
672		0
673		0
674		0
675		0
676		0
677		0
678		0
679		0
680		0
681		0
682		0
683		0
684		0
685		0
686		0
687		0
688		0
689		0
690		0
691		0
692		0
693		0
694		0
695		0
696		0
697		0
698		0
699		0
700		0
701		0
702		0
703		0
704		0
705		0
706		0
707		0
708		0
709		0
710		0
711		0
712		0
713		0
714		0
715		0
716		0
717		0
718		0
719		0
720		0
721		0
722		0
723		0
724		0
725		0
726		0
727		0
728		0
729		0
730		0
731		0
732		0
733		0
734		0
735		0
736		0
737		0
738		0
739		0
740		0
741		0
742		0
743		0
744		0
745		0
746		0
747		0
748		0
749		0
750		0
751		0
752		0
753		0
754		0
755		0
756		0
757		0
758		0
759		0
760		0
761		0
762		0
763		0
764		0
765		0
766		0
767		0
768		0
769		0
770		0
771		0
772		0
773		0
774		0
775		0
776		0
777		0
778		0
779		0
780		0
781		0
782		0
783		0
784		0
785		0
786		0
787		0
788		0
789		0
790		0
791		0
792		0
793		0
794		0
795		0
796		0
797		0
798		0
799		0
800		0
801		0
802		0
803		0
804		0
805		0
806		0
807		0
808		0
809		0
810		0
811		0
812		0
813		0
814		0
815		0
816		0
817		0
818		0
819		0
820		0
821		0
822		0
823		0
824		0
825		0
826		0
827		0
828		0
829		0
830		0
831		0
832		0
833		0
834		0
835		0
836		0
837		0
838		0
839		0
840		0
841		0
842		0
843		0
844		0
845		0
846		0
847		0
848		0
849		0
850		0
851		0
852		0
853		0
854		0
855		0
856		0
857		0
858		0
859		0
860		0
861		0
862		0
863		0
864		0
865		0
866		0
867		0
868		0
869		0
870		0
871		0
872		0
873		0
874		0
875		0
876		0
877		0
878		0
879		0
880		0
881		0
882		0
883		0
884		0
885		0
886		0
887		0
888		0
889		0
890		0
891		0
892		0
893		0
894		0
895		0
896		0
897		0
898		0
899		0
900		0
901		0
902		0
903		0
904		0
905		0
906		0
907		0
908		0
909		0
910		0
911		0
912		0
913		0
914		0
915		0
916		0
917		0
918		0
919		0
920		0
921		0
922		0
923		0
924		0
925		0
926		0
927		0
928		0
929		0
930		0
931		0
932		0
933		0
934		0
935		0
936		0
937		0
938		0
939		0
940		0
941		0
942		0
943		0
944		0
945		0
946		0
947		0
948		0
949		0
950		0
951		0
952		0
953		0
954		0
955		0
956		0
957		0
958		0
959		0
960		0
961		0
962		0
963		0
964		0
965		0
966		0
967		0
968		0
969		0
970		0
971		0
972		0
973		0
974		0
975		0
976		0
977		0
978		0
979		0
980		0
981		0
982		0
983		0
984		0
985		0
986		0
987		0
988		0
989		0
990		0
991		0
992		0
993		0
994		0
995		0
996		0
997		0
998		0
999		0
1000		0
1001		0
1002		0
1003		0
1004		0
1005		0
1006		0
1007		0
1008		0
1009		0
1010		0
1011		0
1012		0
1013		0
1014		0
1015		0
1016		0
1017		0
1018		0
1019		0
1020		0
1021		0
1022		0
1023		0
1024		0
1025		0
1026		0
1027		0
1028		0
1029		0
1030		0
1031		0
1032		0
1033		0
1034		0
1035		0
1036		0
1037		0
1038		0
1039		0
1040		0
1041		0
1042		0
1043		0
1044		0
1045		0
1046		0
1047		0
1048		0
1049		0
1050		0
1051		0
1052		0
1053		0
1054		0
1055		0
1056		0
1057		0
1058		0
1059		0
1060		0
1061		0
1062		0
1063		0
1064		0
1065		0
1066		0
1067		0
1068		0
1069		0
1070		0
1071		0
1072		0
1073		0
1074		0
1075		0
1076		0
1077		0
1078		0
1079		0
1080		0
1081		0
1082		0
1083		0
1084		0
1085		0
1086		0
1087		0
1088		0
1089		0
1090		0
1091		0
1092		0
1093		0
1094		0
1095		0
1096		0
1097		0
1098		0
1099		0
1100		0
1101		0
1102		0
1103		0
1104		0
1105		0
1106		0
1107		0
1108		0
1109		0
1110		0
1111		0
1112		0
1113		0
1114		0
1115		0
1116		0
1117		0
1118		0
1119		0
1120		0
1121		0
1122		0
1123		0
1124		0
1125		0
1126		0
1127		0
1128		0
1129		0
1130		0
1131		0
1132		0
1133		0
1134		0
1135		0
1136		0
1137		0
1138		0
1139		0
1140		0
1141		0
1142		0
1143		0
1144		0
1145		0
1146		0
1147		0
1148		0
1149		0
1150		0
1151		0
1152		0
1153		0
1154		0
1155		0
1156		0
1157		0
1158		0
1159		0
1160		0
1161		0
1162		0
1163		0
1164		0
1165		0
1166		0
1167		0
1168		0
1169		0
1170		0
1171		0
1172		0
1173		0
1174		0
1175		0
1176		0
1177		0
1178		0
1179		0
1180		0
1181		0
1182		0
1183		0
1184		0
1185		0
1186		0
1187		0
1188		0
1189		0
1190		0
1191		0
1192		0
1193		0
1194		0
1195		0
1196		0
1197		0
1198		0
1199		0
1200		0
1201		0
1202		0
1203		0
1204		0
1205		0
1206		0
1207		0
1208		0
1209		0
1210		0
1211		0
1212		0
1213		0
1214		0
1215		0
1216		0
1217		0
1218		0
1219		0
1220		0
1221		0
1222		0
1223		0
1224		0
1225		0
1226		0
1227		0
1228		0
1229		0
1230		0
1231		0
1232		0
1233		0
1234		0
1235		0
1236		0
1237		0
1238		0
1239		0
1240		0
1241		0
1242		0
1243		0
1244		0
1245		0
1246		0
1247		0
1248		0
1249		0
1250		0
1251		0
1252		0
1253		0
1254		0
1255		0
1256		0
1257		0
1258		0
1259		0
1260		0
1261		0
1262		0
1263		0
1264		0
1265		0
1266		0
1267		0
1268		0
1269		0
1270		0
1271		0
1272		0
1273		0
1274		0
1275		0
1276		0
1277		0
1278		0
1279		0
1280		0
1281		0
1282		0
1283		0
1284		0
1285		0
1286		0
1287		0
1288		0
1289		0
1290		0
1291		0
1292		0
1293		0
1294		0
1295		0
1296		0
1297		0
1298		0
1299		0
1300		0
1301		0
1302		0
1303		0
1304		0
1305		0
1306		0
1307		0
1308		0
1309		0
1310		0
1311		0
1312		0
1313		0
1314		0
1315		0
1316		0
1317		0
1318		0
1319		0
1320		0
1321		0
1322		0
1323		0
1324		0
1325		0
1326		0
1327		0
1328		0
1329		0
1330		0
1331		0
1332		0
1333		0
1334		0
1335		0
1336		0
1337		0
1338		0
1339		0
1340		0
1341		0
1342		0
1343		0
1344		0
1345		0
1346		0
1347		0
1348		0
1349		0
1350		0
1351		0
1352		0
1353		0
1354		0
1355		0
1356		0
1357		0
1358		0
1359		0
1360		0
1361		0
1362		0
1363		0
1364		0
1365		0
1366		0
1367		0
1368		0
1369		0
1370		0
1371		0
1372		0
1373		0
1374		0
1375		0
1376		0
1377		0
1378		0
1379		0
1380		0
1381		0
1382		0
1383		0
1384		0
1385		0
1386		0
1387		0
1388		0
1389		0
1390		0
1391		0
1392		0
1393		0
1394		0
1395		0
1396		0
1397		0
1398		0
1399		0
1400		0
1401		0
1402		0
1403		0
1404		0
1405		0
1406		0
1407		0
1408		0
1409		0
1410		0
1411		0
1412		0
1413		0
1414		0
1415		0
1416		0
1417		0
1418		0
1419		0
1420		0
1421		0
1422		0
1423		0
1424		0
1425		0
1426		0
1427		0
1428		0
1429		0
1430		0
1431		0
1432		0
1433		0
1434		0
1435		0
1436		0
1437		0
1438		0
1439		0
1440		0
1441		0
1442		0
1443		0
1444		0
1445		0
1446		0
1447		0
1448		0
1449		0
1450		0
1451		0
1452		0
1453		0
1454		0
1455		0
1456		0
1457		0
1458		0
1459		0
1460		0
1461		0
1462		0
1463		0
1464		0
1465		0
1466		0
1467		0
1468		0
1469		0
1470		0
1471		0
1472		0
1473		0
1474		0
1475		0
1476		0
1477		0
1478		0
1479		0
1480		0
1481		0
1482		0
1483		0
1484		0
1485		0
1486		0
1487		0
1488		0
1489		0
1490		0
1491		0
1492		0
1493		0
1494		0
1495		0
1496		0
1497		0
1498		0
1499		0
1500		0
1501		0
1502		0
1503		0
1504		0
1505		0
1506		0
1507		0
1508		0
1509		0
1510		0
1511		0
1512		0
1513		0
1514		0
1515		0
1516		0
1517		0
1518		0
1519		0
1520		0
1521		0
1522		0
1523		0
1524		0
1525		0
1526		0
1527		0
1528		0
1529		0
1530		0
1531		0
1532		0
1533		0
1534		0
1535		0
1536		0
1537		0
1538		0
1539		0
1540		0
1541		0
1542		0
1543		0
1544		0
1545		0
1546		0
1547		0
1548		0
1549		0
1550		0
1551		0
1552		0
1553		0
1554		0
1555		0
1556		0
1557		0
1558		0
1559		0
1560		0
1561		0
1562		0
1563		0
1564		0
1565		0
1566		0
1567		0
1568		0
1569		0
1570		0
1571		0
1572		0
1573		0
1574		0
1575		0
1576		0
1577		0
1578		0
1579		0
1580		0
1581		0
1582		0
1583		0
1584		0
1585		0
1586		0
1587		0
1588		0
1589		0
1590		0
1591		0
1592		0
1593		0
1594		0
1595		0
1596		0
1597		0
1598		0
1599		0
1600		0
1601		0
1602		0
1603		0
1604		0
1605		0
1606		0
1607		0
1608		0
1609		0
1610		0
1611		0
1612		0
1613		0
1614		0
1615		0
1616		0
1617		0
1618		0
1619		0
1620		0
1621		0
1622		0
1623		0
1624		0
1625		0
1626		0
1627		0
1628		0
1629		0
1630		0
1631		0
1632		0
1633		0
1634		0
1635		0
1636		0
1637		0
1638		0
1639		0
1640		0
1641		0
1642		0
1643		0
1644		0
1645		0
1646		0
1647		0
1648		0
1649		0
1650		0
1651		0
1652		0
1653		0
1654		0
1655		0
1656		0
1657		0
1658		0
1659		0
1660		0
1661		0
1662		0
1663		0
1664		0
1665		0
1666		0
1667		0
1668		0
1669		0
1670		0
1671		0
1672		0
1673		0
1674		0
1675		0
1676		0
1677		0
1678		0
1679		0
1680		0
1681		0
1682		0
1683		0
1684		0
1685		0
1686		0
1687		0
1688		0
1689		0
1690		0
1691		0
1692		0
1693		0
1694		0
1695		0
1696		0
1697		0
1698		0
1699		0
1700		0
1701		0
1702		0
1703		0
1704		0
1705		0
1706		0
1707		0
1708		0
1709		0
1710		0
1711		0
1712		0
1713		0
1714		0
1715		0
1716		0
1717		0
1718		0
1719		0
1720		0
1721		0
1722		0
1723		0
1724		0
1725		0
1726		0
1727		0
1728		0
1729		0
1730		0
1731		0
1732		0
1733		0
1734		0
1735		0
1736		0
1737		0
1738		0
1739		0
1740		0
1741		0
1742		0
1743		0
1744		0
1745		0
1746		0
1747		0
1748		0
1749		0
1750		0
1751		0
1752		0
1753		0
1754		0
1755		0
1756		0
1757		0
1758		0
1759		0
1760		0
1761		0
1762		0
1763		0
1764		0
1765		0
1766		0
1767		0
1768		0
1769		0
1770		0
1771		0
1772		0
1773		0
1774		0
1775		0
1776		0
1777		0
1778		0
1779		0
1780		0
1781		0
1782		0
1783		0
1784		0
1785		0
1786		0
1787		0
1788		0
1789		0
1790		0
1791		0
1792		0
1793		0
1794		0
1795		0
1796		0
1797		0
1798		0
1799		0
1800		0
1801		0
1802		0
1803		0
1804		0
1805		0
1806		0
1807		0
1808		0
1809		0
1810		0
1811		0
1812		0
1813		0
1814		0
1815		0
1816		0
1817		0
1818		0
1819		0
1820		0
1821		0
1822		0
1823		0
1824		0
1825		0
1826		0
1827		0
1828		0
1829		0
1830		0
1831		0
1832		0
1833		0
1834		0
1835		0
1836		0
1837		0
1838		0
1839		0
1840		0
1841		0
1842		0
1843		0
1844		0
1845		0
1846		0
1847		0
1848		0
1849		0
1850		0
1851		0
1852		0
1853		0
1854		0
1855		0
1856		0
1857		0
1858		0
1859		0
1860		0
1861		0
1862		0
1863		0
1864		0
1865		0
1866		0
1867		0
1868		0
1869		0
1870		0
1871		0
1872		0
1873		0
1874		0
1875		0
1876		0
1877		0
1878		0
1879		0
1880		0
1881		0
1882		0
1883		0
1884		0
1885		0
1886		0
1887		0
1888		0
1889		0
1890		0
1891		0
1892		0
1893		0
1894		0
1895		0
1896		0
1897		0
1898		0
1899		0
1900		0
1901		0
1902		0
1903		0
1904		0
1905		0
1906		0
1907		0
1908		0
1909		0
1910		0
1911		0
1912		0
1913		0
1914		0
1915		0
1916		0
1917		0
1918		0
1919		0
1920		0
1921		0
1922		0
1923		0
1924		0
1925		0
1926		0
1927		0
1928		0
1929		0
1930		0
1931		0
1932		0
1933		0
1934		0
1935		0
1936		0
1937		0
1938		0
1939		0
1940		0
1941		0
1942		0
1943		0
1944		0
1945		0
1946		0
1947		0
1948		0
1949		0
1950		0
1951		0
1952		0
1953		0
1954		0
1955		0
1956		0
1957		0
1958		0
1959		0
1960		0
1961		0
1962		0
1963		0
1964		0
1965		0
1966		0
1967		0
1968		0
1969		0
1970		0
1971		0
1972		0
1973		0
1974		0
1975		0
1976		0
1977		0
1978		0
1979		0
1980		0
1981		0
1982		0
1983		0
1984		0
1985		0
1986		0
1987		0
1988		0
1989		0
1990		0
1991		0
1992		0
1993		0
1994		0
1995		0
1996		0
1997		0
1998		0
[truncated: 15,521 more rows]

[truncated: 9 more sheets: 329m Fall, 312m Winter, 312m Spring, 312m Summer, 312m Fall, 297m Winter, 297m Spring, 297m Summer, 297m Fall]
